# Supplementary material for: Metal-free cascade synthesis of unsymmetrical 2-aminopyrimidines from imidazolate enaminones
Source: Royal Society of Chemistry journal article supplement (doi:10.1039/d1ra04319f), 2021-01-01

## Metal-Free Cascade Synthesis of Unsymmetrical 2-Aminopyrimidines from Imidazolate Enaminones†

Xue Cui,<sup>‡</sup> Jianting Ma,<sup>‡</sup> Tingting Zeng, Junyu Xu, Youbin Li\* and Xuesong Wang\*

Key Laboratory of Tropical Translational Medicine of Ministry of Education, Hainan Provincial Key Laboratory for Research and Development of Tropical Herbs, Haikou Key Laboratory of Li Nationality Medicine, School of Pharmacy, Hainan Medical University, Haikou 571199, P. R. China

<sup>‡</sup> X. Chen and J. Ma contributed equally to this work

Corresponding Author: Youbin Li and Xuesong Wang

E-mail: liyoubinli@sohu.com and wxuesong18@163.com

### Context

|                                                                                                     |        |
|-----------------------------------------------------------------------------------------------------|--------|
| The preparation of <b>1a–1s</b> & <b>A–G</b> .....                                                  | S2-7   |
| HRMS spectra of compounds <b>A–G</b> .....                                                          | S8-11  |
| <sup>1</sup> H NMR and <sup>13</sup> C NMR spectra of compounds <b>1a–1s</b> & <b>A–G</b> .....     | S12-42 |
| <sup>1</sup> H NMR and <sup>13</sup> C NMR spectra of compounds <b>3a–3u</b> & <b>3ab–3ed</b> ..... | S43-67 |

## General information

Unless otherwise stated, all reagents were used directly without further purification. Silica gel was purchased from Qing Dao Hai Yang Chemical Industry Co. All melting points were determined on a Beijing Science Instrument Dianguang Instrument Factory XT4B melting point apparatus and uncorrected.  $^1\text{H}$  and  $^{13}\text{C}$  NMR spectra were measured on a 400 MHz Bruker spectrometer ( $^1\text{H}$  400 MHz,  $^{13}\text{C}$  100 MHz), using  $\text{CDCl}_3$  as the solvent with tetramethylsilane (TMS) as the internal standard at room temperature. HRMS-ESI spectra were equipped with an ESI source and a TOF detector. PE is petroleum ether (60–90 °C).

### Typical procedure for the preparation of (Z/E)-3-(1H-imidazol-1-yl)-1,3-diphenylprop-2-en-1-one (**1a**)<sup>1</sup>

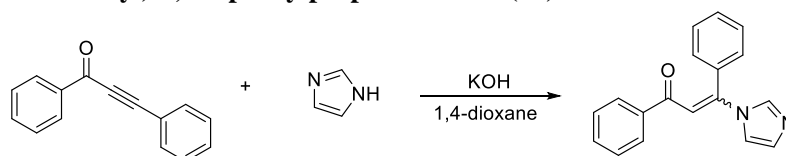

A suspension of 1,3-diphenylprop-2-yn-1-one (1.0 mmol, 206 mg), 1H-imidazole (2.0 mmol, 136 mg) and KOH (2.0 mmol, 112 mg) in 1,4-dioxane (5 mL) was stirred at rt for 5 h. After the ynone was exhausted completely (monitored by TLC), it was cooled down to room temperature and saturated aqueous brine (10 mL) was added. The mixture was stirred for 10 min and then was extracted by EtOAc (3 × 10 mL). The combined organic layers were dried over  $\text{Na}_2\text{SO}_4$ . After filtration, removal of the solvent gave a residue, which was purified by a column chromatography (silica gel, PE/EtOAc = 6/1) to afford **1a** as yellow liquid; 247 mg, 90% yield;  $^1\text{H}$  NMR (400 MHz,  $\text{CDCl}_3$ )  $\delta$  7.90 (d,  $J = 4.0$  Hz, 1H), 7.88 (d,  $J = 4.0$  Hz, 1H), 7.62–7.29 (m, 9H), 7.17–6.89 (m, 3H);  $^{13}\text{C}$  NMR (100 MHz,  $\text{CDCl}_3$ )  $\delta$  190.3, 147.6, 144.9, 138.6, 137.9, 137.5, 137.3, 135.8, 133.5, 133.3, 133.2, 131.4, 130.8, 130.7, 129.8, 129.7, 129.2, 128.8, 128.7, 128.6, 128.5, 127.9, 120.5, 118.7, 117.7, 114.5.

A similar procedure was used for the preparation of products **1b–1s** & **A–G**.

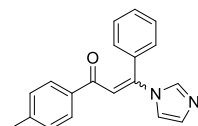

(Z/E)-3-(1H-imidazol-1-yl)-3-phenyl-1-(p-tolyl)prop-2-en-1-one (**1b**). 265 mg, 92% yield; yellow liquid.  $^1\text{H}$  NMR (400 MHz,  $\text{CDCl}_3$ )  $\delta$  7.81 (d,  $J = 4.0$  Hz, 1H), 7.79 (d,  $J = 4.0$  Hz, 1H), 7.61–7.28 (m, 6H), 7.22–6.88 (m, 5H), 7.38 (s, 1.5H), 7.37 (s, 1.5H);  $^{13}\text{C}$  NMR (100 MHz,  $\text{CDCl}_3$ )  $\delta$  189.74, 189.69, 146.9, 144.4, 144.2, 144.1, 138.4, 137.3, 135.7, 135.2, 134.6, 133.2, 131.1, 130.54, 130.48, 129.6, 129.5, 129.3, 129.2, 129.0, 128.6, 128.54, 128.50, 127.7, 120.3, 118.6, 117.8, 114.6, 21.61, 21.58.

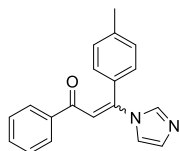

(Z/E)-3-(1H-imidazol-1-yl)-1-phenyl-3-(p-tolyl)prop-2-en-1-one (**1b'**). 262 mg, 91% yield; yellow solid.  $^1\text{H}$  NMR (400 MHz,  $\text{CDCl}_3$ )  $\delta$  7.88 (d,  $J = 8.0$  Hz, 1H), 7.85 (d,  $J = 8.0$  Hz, 1H), 7.60–7.36 (m, 4H), 7.24–7.12 (m, 5H), 6.99–6.86 (m, 2H), 2.39 (s, 1.5H), 2.33 (s, 1.5H);  $^{13}\text{C}$  NMR (100 MHz,  $\text{CDCl}_3$ )  $\delta$  190.1, 190.0, 147.5, 144.9, 140.9, 138.3, 137.7, 137.3, 137.2, 133.1, 133.0, 132.7, 130.4, 130.0, 129.60, 129.56, 129.4, 129.2, 128.44, 128.39, 128.34, 128.2, 127.7, 120.3, 118.6, 116.4, 113.8, 21.28, 21.24.

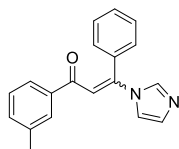

(Z/E)-3-(1H-imidazol-1-yl)-3-phenyl-1-(m-tolyl)prop-2-en-1-one (**1c**). 277 mg, 96% yield; yellow liquid.  $^1\text{H}$  NMR (400 MHz,  $\text{CDCl}_3$ )  $\delta$  7.67–7.28 (m, 10H), 7.13–6.86 (m, 3H), 2.33 (s,

3H);  $^{13}\text{C}$  NMR (100 MHz,  $\text{CDCl}_3$ )  $\delta$  190.18, 190.12, 147.0, 144.3, 138.3, 138.2, 137.6, 137.2, 137.0, 135.5, 134.1, 133.8, 133.0, 131.1, 130.44, 130.39, 129.5, 129.4, 128.9, 128.7, 128.4, 128.34, 128.29, 127.6, 125.6, 125.5, 120.2, 118.5, 117.7, 114.5, 21.1.

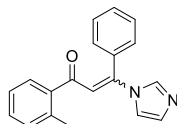

**(Z/E)-3-(1H-imidazol-1-yl)-3-phenyl-1-(o-tolyl)prop-2-en-1-one (1d).** 230 mg, 80% yield; yellow liquid.  $^1\text{H}$  NMR (400 MHz,  $\text{CDCl}_3$ )  $\delta$  7.57–7.27 (m, 7H), 7.25–7.10 (m, 4H), 6.95–6.74 (m, 2H), 2.49 (s, 1.4H), 2.43 (s, 1.6H);  $^{13}\text{C}$  NMR (100 MHz,  $\text{CDCl}_3$ )  $\delta$  194.0, 193.4, 147.0, 144.3, 138.5, 138.3, 138.2, 138.1, 137.3, 137.2, 135.4, 132.9, 131.8, 131.7, 131.5, 131.3, 131.2, 130.7, 130.6, 129.7, 129.6, 129.1, 129.0, 128.5, 127.6, 125.4, 120.8, 120.1, 118.5, 117.5, 20.9, 20.7.

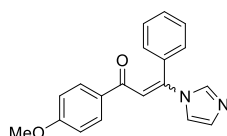

**(Z/E)-3-(1H-imidazol-1-yl)-1-(4-methoxyphenyl)-3-phenylprop-2-en-1-one (1e).** 280 mg, 92% yield; yellow liquid.  $^1\text{H}$  NMR (400 MHz,  $\text{CDCl}_3$ )  $\delta$  7.90 (d,  $J = 4.0$  Hz, 1H), 7.88 (d,  $J = 4.0$  Hz, 1H), 7.62–7.28 (m, 6H), 7.16–6.87 (m, 5H), 3.84 (s, 3H);  $^{13}\text{C}$  NMR (100 MHz,  $\text{CDCl}_3$ )  $\delta$  188.8, 188.7, 163.8, 163.6, 146.4, 143.7, 138.4, 137.3, 135.8, 133.3, 131.0, 130.9, 130.8, 130.7, 130.5, 130.4, 130.1, 129.6, 129.5, 129.0, 128.6, 127.7, 120.3, 118.6, 118.0, 114.8, 113.9, 113.7, 55.4.

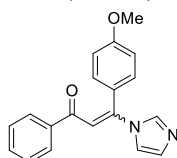

**(Z/E)-3-(1H-imidazol-1-yl)-3-(4-methoxyphenyl)-1-phenylprop-2-en-1-one (1e').** 286 mg, 94% yield; yellow liquid.  $^1\text{H}$  NMR (400 MHz,  $\text{CDCl}_3$ )  $\delta$  7.86 (t,  $J = 8.0$  Hz, 2H), 7.63–7.28 (m, 5H), 7.23–6.82 (m, 6H), 3.83 (s, 1.5H), 3.78 (s, 1.5H);  $^{13}\text{C}$  NMR (100 MHz,  $\text{CDCl}_3$ )  $\delta$  190.3, 189.8, 162.1, 161.4, 147.4, 145.0, 138.4, 137.8, 137.5, 137.4, 133.1, 133.0, 131.5, 130.4, 129.5, 129.4, 128.5, 128.45, 128.38, 128.2, 127.8, 125.0, 120.3, 118.8, 115.3, 114.4, 113.9, 113.6, 55.4, 55.2.

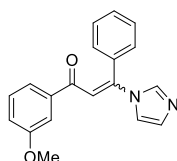

**(Z/E)-3-(1H-imidazol-1-yl)-1-(3-methoxyphenyl)-3-phenylprop-2-en-1-one (1f).** 268 mg, 88% yield; yellow liquid.  $^1\text{H}$  NMR (400 MHz,  $\text{CDCl}_3$ )  $\delta$  7.59–7.27 (m, 9H), 7.14–6.88 (m, 4H), 3.79 (s, 1.6H), 3.77 (m, 1.4H);  $^{13}\text{C}$  NMR (100 MHz,  $\text{CDCl}_3$ )  $\delta$  189.7, 189.6, 159.7, 159.6, 147.4, 144.7, 139.0, 138.5, 138.4, 137.2, 135.5, 133.0, 131.2, 130.6, 130.5, 129.6, 129.5, 129.4, 128.9, 128.5, 127.7, 121.0, 120.9, 120.3, 119.9, 119.7, 118.5, 117.4, 114.1, 112.4, 112.3, 55.27, 55.25.

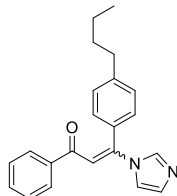

**(Z/E)-3-(4-butylphenyl)-3-(1H-imidazol-1-yl)-1-phenylprop-2-en-1-one (1g).** 297 mg, 90% yield; yellow liquid.  $^1\text{H}$  NMR (400 MHz,  $\text{CDCl}_3$ )  $\delta$  7.87 (q,  $J = 4.0$  Hz, 1H), 7.85 (q,  $J = 4.0$  Hz, 1H), 7.61–7.34 (m, 4H), 7.23–6.86 (m, 7H), 2.64 (t,  $J = 8.0$  Hz, 1H), 5.58 (t,  $J = 8.0$  Hz, 1H), 1.60 (t,  $J = 8.0$  Hz, 1H), 1.55 (t,  $J = 8.0$  Hz, 1H), 1.36 (q,  $J = 8.0$  Hz, 1H), 1.28 (q,  $J = 8.0$  Hz, 1H), 0.92 (t,  $J = 4.0$  Hz, 1.5H), 0.89 (t,  $J = 4.0$  Hz, 1.5H);  $^{13}\text{C}$  NMR (100 MHz,  $\text{CDCl}_3$ )  $\delta$  190.5, 189.9, 147.5, 146.8, 145.9, 144.9, 138.4, 137.7, 137.34, 137.29, 133.1, 132.9, 132.8, 130.4, 130.2, 129.7,

129.4, 129.0, 138.5, 128.45, 128.39, 128.3, 128.2, 127.7, 120.3, 118.6, 116.5, 114.1, 35.3, 33.1, 33.0, 22.13, 22.09, 13.75.

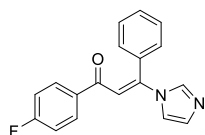

**(E)-1-(4-fluorophenyl)-3-(1H-imidazol-1-yl)-3-phenylprop-2-en-1-one (1h).** 237 mg, 81% yield; yellow liquid.  $^1\text{H}$  NMR (400 MHz,  $\text{CDCl}_3$ )  $\delta$  7.92 (d,  $J = 4.0$  Hz, 1H), 7.90 (d,  $J = 8.0$  Hz, 1H), 7.61–7.28 (m, 6H), 7.17–6.90 (m, 5H);  $^{13}\text{C}$  NMR (100 MHz,  $\text{CDCl}_3$ )  $\delta$  188.8, 165.6 (d,  $J = 254$  Hz), 147.6, 137.4, 134.2 (d,  $J = 3$  Hz), 133.0, 131.2 (d,  $J = 10$  Hz), 130.8 (d,  $J = 3$  Hz), 129.7, 128.7, 118.5, 115.7 (d,  $J = 22$  Hz), 114.0

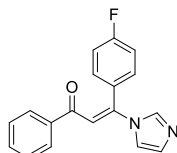

**(E)-3-(4-fluorophenyl)-3-(1H-imidazol-1-yl)-1-phenylprop-2-en-1-one (1h').** 219 mg, 75% yield; yellow liquid.  $^1\text{H}$  NMR (400 MHz,  $\text{CDCl}_3$ )  $\delta$  7.90 (d,  $J = 8.0$  Hz, 2H), 7.62–7.29 (m, 6H), 7.18–7.67 (m, 5H);  $^{13}\text{C}$  NMR (100 MHz,  $\text{CDCl}_3$ )  $\delta$  189.9, 163.9 (d,  $J = 251$  Hz), 146.4, 137.7, 137.3, 133.3, 131.9 (d,  $J = 9$  Hz), 130.8, 129.1 (d,  $J = 4$  Hz), 128.5 (d,  $J = 20$  Hz), 118.6, 115.9 (d,  $J = 22$  Hz), 114.4.

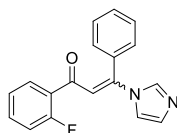

**(Z/E)-1-(2-fluorophenyl)-3-(1H-imidazol-1-yl)-3-phenylprop-2-en-1-one (1i).** 210 mg, 72% yield; yellow liquid.  $^1\text{H}$  NMR (400 MHz,  $\text{CDCl}_3$ )  $\delta$  7.71–7.60 (m, 2H), 7.49–7.28 (m, 8H), 7.17–6.89 (m, 6H);  $^{13}\text{C}$  NMR (100 MHz,  $\text{CDCl}_3$ )  $\delta$  187.6, 187.0, 162.1, 126.0, 159.6, 159.5, 147.7, 145.0, 135.5, 134.5, 134.4, 134.2, 134.1, 132.8, 131.3, 130.7, 130.6, 130.5, 129.8, 128.9, 128.4, 127.8, 124.5, 124.4, 124.3, 124.2, 120.1, 120.0, 116.6, 116.5, 116.4, 116.3, 116.2, 116.1,

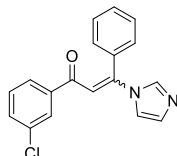

**(Z/E)-1-(3-chlorophenyl)-3-(1H-imidazol-1-yl)-3-phenylprop-2-en-1-one (1j).** 243 mg, 79% yield; yellow liquid.  $^1\text{H}$  NMR (400 MHz,  $\text{CDCl}_3$ )  $\delta$  7.81 (d,  $J = 4.0$  Hz, 1H), 7.74 (d,  $J = 8.0$  Hz, 1H), 7.60–7.27 (m, 8H), 7.15–6.86 (m, 3H);  $^{13}\text{C}$  NMR (100 MHz,  $\text{CDCl}_3$ )  $\delta$  188.9, 188.7, 148.3, 145.7, 139.3, 138.7, 135.3, 134.8, 134.7, 133.1, 132.9, 132.8, 131.5, 130.8, 130.7, 129.9, 129.8, 129.6, 129.0, 128.6, 128.5, 128.2, 127.9, 126.5, 126.3, 116.7, 113.5.

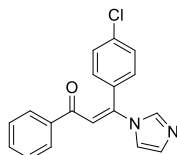

**(E)-3-(4-chlorophenyl)-3-(1H-imidazol-1-yl)-1-phenylprop-2-en-1-one (1k).** 231 mg, 75% yield; yellow solid, mp 119.6–1124.6 °C.  $^1\text{H}$  NMR (400 MHz,  $\text{CDCl}_3$ )  $\delta$  7.90 (d,  $J = 4.0$  Hz, 2H), 7.26–7.34 (m, 7H), 7.24–7.00 (m, 4H);  $^{13}\text{C}$  NMR (100 MHz,  $\text{CDCl}_3$ )  $\delta$  189.7, 146.3, 137.6, 137.2, 136.8, 133.3, 131.5, 131.0 (2C), 130.9, 128.9 (2C), 128.6 (2C), 128.4 (2C), 118.5, 114.5.

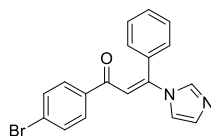

**(E)-1-(3-bromophenyl)-3-(1H-imidazol-1-yl)-3-phenylprop-2-en-1-one (1l).** 272 mg, 77% yield; yellow solid, mp 134.5–139.3 °C. <sup>1</sup>H NMR (400 MHz, CDCl<sub>3</sub>) δ 7.74 (d, *J* = 8.0 Hz, 2H), 7.61–7.27 (m, 8H), 7.17–6.89 (m, 3H); <sup>13</sup>C NMR (100 MHz, CDCl<sub>3</sub>) δ 189.1, 147.9, 137.4, 136.5, 132.9, 131.8 (2C), 130.8 (2C), 129.9 (2C), 129.8 (2C), 129.8 (2C), 128.2, 118.5, 113.6,

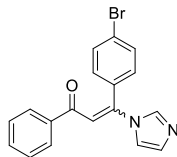

**(Z/E)-3-(4-bromophenyl)-3-(1H-imidazol-1-yl)-1-phenylprop-2-en-1-one (1l').** 247 mg, 70% yield; yellow liquid. <sup>1</sup>H NMR (400 MHz, CDCl<sub>3</sub>) δ 7.89–7.83 (m, 2H), 7.59–7.36 (m, 6H), 7.22–6.83 (m, 5H); <sup>13</sup>C NMR (100 MHz, CDCl<sub>3</sub>) δ 189.7, 189.5, 146.2, 143.4, 138.2, 137.5, 137.1, 136.8, 134.4, 133.4, 133.2, 132.2, 131.9, 131.8, 131.1, 130.7, 129.7, 129.1, 128.5, 128.3, 128.2, 125.7, 125.1, 120.0, 118.4, 117.9, 114.4.

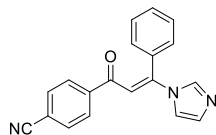

**(E)-4-(3-(1H-imidazol-1-yl)-3-phenylacryloyl)benzonitrile (1m).** 206 mg, 69% yield; yellow solid. <sup>1</sup>H NMR (400 MHz, CDCl<sub>3</sub>) δ 7.91 (d, *J* = 8.0 Hz, 2H), 7.67–7.28 (m, 8H), 7.18–6.88 (m, 3H); <sup>13</sup>C NMR (100 MHz, CDCl<sub>3</sub>) δ 189.0, 149.1, 141.0, 137.4, 132.6, 132.2 (2C), 131.11, 131.07, 129.8 (2C), 128.7 (2C), 118.4, 117.8, 115.9, 112.9.

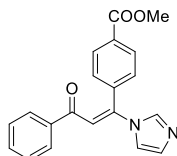

**(E)-methyl 4-(1-(1H-imidazol-1-yl)-3-oxo-3-phenylprop-1-en-1-yl)benzoate (1n).** 216 mg, 65% yield; yellow liquid. <sup>1</sup>H NMR (400 MHz, CDCl<sub>3</sub>) δ 8.11 (d, *J* = 8.0 Hz, 2H), 7.89 (d, *J* = 8.0 Hz, 2H), 7.58–7.41 (m, 6H), 7.04–6.87 (m, 3H), 3.95 (s, 3H); <sup>13</sup>C NMR (100 MHz, CDCl<sub>3</sub>) δ 190.1, 166.0, 139.7, 138.4, 136.8, 133.7, 132.5, 130.2 (2C), 130.0, 128.7 (2C), 128.4 (2C), 127.7 (2C), 120.2, 119.5, 52.5.

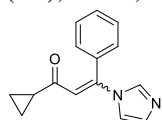

**(Z/E)-1-cyclopropyl-3-(1H-imidazol-1-yl)-3-phenylprop-2-en-1-one. yellow liquid (1o).** 198 mg, 83% yield; yellow liquid. <sup>1</sup>H NMR (400 MHz, CDCl<sub>3</sub>) δ 7.61–7.34 (m, 5H), 7.30–7.27 (m, 1H), 7.18 (s, 0.5H), 7.13 (s, 0.5H), 7.06 (s, 0.5H), 6.95 (s, 0.5H), 6.49 (s, 0.5H), 6.43 (s, 0.5H), 1.67–1.53 (m, 1H), 1.10–1.00 (m, 2H), 0.84–0.69 (m, 2H); <sup>13</sup>C NMR (100 MHz, CDCl<sub>3</sub>) δ 200.0, 199.6, 146.1, 143.6, 138.9, 137.3, 135.4, 133.1, 131.2, 130.9, 130.7, 130.0, 129.0, 128.7, 127.6, 121.5, 120.4, 118.4, 117.9, 22.1, 21.0, 12.51, 12.48.

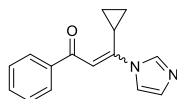

**(Z/E)-1-cyclopropyl-3-(1H-imidazol-1-yl)-3-phenylprop-2-en-1-one (1o').** 157 mg, 66% yield; yellow liquid. <sup>1</sup>H NMR (400 MHz, CDCl<sub>3</sub>) δ 7.94–7.36 (m, 6H), 7.19–6.34 (m, 3H), 2.57–2.50 (m, 0.7H), 1.81–1.74 (m, 0.3H), 1.12–1.03 (m, 2H), 0.94–0.60 (m, 2H); <sup>13</sup>C NMR (100 MHz, CDCl<sub>3</sub>) δ 190.7, 190.4, 151.7, 148.0, 138.2, 137.2, 137.0, 136.4, 133.23, 133.20, 130.0, 129.5, 128.7, 128.5, 128.3, 128.2, 118.8, 118.4, 117.5, 114.1, 17.2, 13.6, 8.8, 8.0.

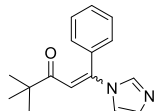

**(Z/E)-1-(1H-imidazol-1-yl)-4,4-dimethyl-1-phenylpent-1-en-3-one (1p).** 193 mg, 76% yield; yellow liquid. <sup>1</sup>H NMR (400 MHz, CDCl<sub>3</sub>) δ 7.54–7.38 (m, 4H), 7.27 (s, 1H), 7.25 (d, *J* = 4.0 Hz, 1H), 7.12 (d, *J* = 8.0 Hz, 1H), 7.04 (s, 0.5H), 6.87 (s, 0.5H), 6.73 (s, 0.5H), 6.67 (s, 0.5H), 1.20 (s, 4.3H), 1.19 (s, 4.7); <sup>13</sup>C NMR (100 MHz, CDCl<sub>3</sub>) δ 203.6, 203.1, 147.2, 144.4, 138.6, 137.2, 136.3, 133.3, 131.1, 130.5, 130.3, 129.2, 128.9, 128.5, 127.7, 120.3, 118.3, 115.6, 111.7, 44.4, 44.1, 26.4, 26.3.

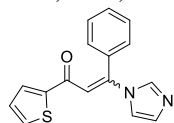

**(Z/E)-3-(1H-imidazol-1-yl)-3-phenyl-1-(thiophen-2-yl)prop-2-en-1-one (1q).** 204 mg, 73% yield; yellow liquid. <sup>1</sup>H NMR (400 MHz, CDCl<sub>3</sub>) δ 7.71–7.58 (m, 3H), 7.49–7.31 (m, 5H), 7.13–6.90 (m, 4H); <sup>13</sup>C NMR (100 MHz, CDCl<sub>3</sub>) δ 181.3, 180.9, 147.6, 145.4, 144.9, 138.5, 137.2, 135.7, 134.6, 134.2, 134.8, 132.1, 132.0, 131.3, 130.6, 130.5, 129.5, 129.4, 128.9, 128.4, 128.1, 128.1, 127.9, 120.4, 118.4, 116.0, 112.8.

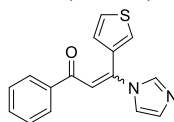

**(Z/E)-3-(1H-imidazol-1-yl)-1-phenyl-3-(thiophen-2-yl)prop-2-en-1-one (1r).** 190 mg, 68% yield; yellow liquid. <sup>1</sup>H NMR (400 MHz, CDCl<sub>3</sub>) δ 7.87–7.82 (m, 2H), 7.67–7.32 (m, 6H), 7.23–6.82 (m, 4H); <sup>13</sup>C NMR (100 MHz, CDCl<sub>3</sub>) δ 190.3, 189.7, 141.3, 139.6, 138.0, 137.8, 137.5, 137.2, 137.1, 133.4, 133.1, 133.0, 130.4, 129.7, 129.3, 128.4, 128.3, 128.1, 127.9, 127.5, 126.2, 125.7, 120.1, 118.7, 116.3, 114.7.

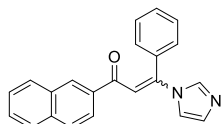

**(Z/E)-3-(1H-imidazol-1-yl)-1-(naphthalen-2-yl)-3-phenylprop-2-en-1-one (1s).** 285 mg, 88% yield; yellow solid. <sup>1</sup>H NMR (400 MHz, CDCl<sub>3</sub>) δ 8.44 (d, *J* = 8.0 Hz, 1H), 7.98–7.83 (m, 4H), 7.76–7.33 (m, 8H), 7.20–6.92 (m, 3H); <sup>13</sup>C NMR (100 MHz, CDCl<sub>3</sub>) δ 190.0, 189.8, 147.3, 144.7, 138.4, 137.4, 135.7, 135.6, 135.5, 135.1, 134.6, 133.2, 132.3, 132.2, 131.3, 130.7, 130.6, 130.4, 130.3, 129.7, 129.6, 129.5, 129.4, 129.0, 128.7, 128.6, 128.5, 127.9, 127.8, 127.7, 126.9, 126.8, 123.9, 123.7, 120.3, 118.6, 117.6, 114.5.

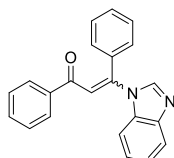

**(Z/E)-3-(1H-benzo[d]imidazol-1-yl)-1,3-diphenylprop-2-en-1-one (A).** 308 mg, 95% yield; yellow solid. <sup>1</sup>H NMR (400 MHz, CDCl<sub>3</sub>) δ 7.94–7.72 (m, 4H), 7.51–7.27 (m, 8H), 7.24–6.81 (m, 4H); <sup>13</sup>C NMR (100 MHz, CDCl<sub>3</sub>) δ 190.6, 189.5, 146.8, 144.4, 143.7, 143.5, 142.8, 137.5, 137.2, 134.8, 133.3, 133.2, 133.1, 133.0, 131.3, 130.7, 129.6, 129.0, 128.6, 128.5, 128.4, 128.3, 128.0, 127.6, 124.0, 123.4, 122.7, 120.7, 120.2, 118.2, 116.9, 112.1, 111.6.

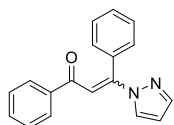

**(Z/E)-1,3-diphenyl-3-(1H-pyrazol-1-yl)prop-2-en-1-one (B).** 225 mg, 82% yield; yellow liquid. <sup>1</sup>H NMR (400 MHz, CDCl<sub>3</sub>) δ 7.99–7.80 (m, 3H), 7.53–7.34 (m, 9H), 7.23–6.22 (m, 2H); <sup>13</sup>C NMR (100 MHz, CDCl<sub>3</sub>) δ 191.8, 189.8, 149.5, 146.7, 142.7, 141.4, 138.6, 137.4, 135.4, 133.1, 132.7, 132.6, 131.8, 130.7, 130.7, 129.8, 127.8, 127.5, 128.4, 128.38, 128.35, 128.30, 117.3, 111.3, 108.2, 107.3.

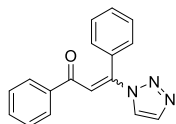

**(Z/E)-1,3-diphenyl-3-(1H-1,2,3-triazol-1-yl)prop-2-en-1-one (C).** 223 mg, 81% yield; yellow solid.  $^1\text{H}$  NMR (400 MHz,  $\text{CDCl}_3$ )  $\delta$  7.96 (d,  $J = 8.0$  Hz, 1H), 7.88 (d,  $J = 8.0$  Hz, 1H), 7.84–7.69 (m, 2H), 7.56–7.32 (m, 9H);  $^{13}\text{C}$  NMR (100 MHz,  $\text{CDCl}_3$ )  $\delta$  190.1, 189.9, 144.9, 143.2, 137.4, 136.8, 134.3, 134.1, 133.6, 133.5, 133.4, 132.0, 131.3, 130.6, 129.5, 129.1, 128.68, 128.6, 128.57, 128.54, 127.4, 125.7, 124.3, 121.0, 116.9.

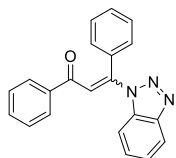

**(Z/E)-3-(1H-benzo[d][1,2,3]triazol-1-yl)-1,3-diphenylprop-2-en-1-one (D).** 280 mg, 86% yield; yellow solid.  $^1\text{H}$  NMR (400 MHz,  $\text{CDCl}_3$ )  $\delta$  8.11–7.76 (m, 3H), 7.62–7.30 (m, 9H), 7.23–6.48 (m, 3H);  $^{13}\text{C}$  NMR (100 MHz,  $\text{CDCl}_3$ )  $\delta$  190.3, 146.6, 145.7, 143.2, 137.5, 136.9, 133.8, 133.3, 133.2, 132.9, 132.5, 132.0, 131.3, 130.7, 129.6, 129.1, 128.7, 128.6, 128.5, 128.3, 128.2, 128.1, 128.0, 127.5, 124.6, 124.2, 121.0, 120.3, 120.0, 118.2, 111.7, 110.7.

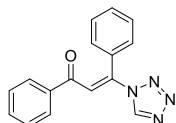

**(E)-1,3-diphenyl-3-(1H-tetrazol-1-yl)prop-2-en-1-one (E).** 207 mg, 75% yield; yellow solid.  $^1\text{H}$  NMR (400 MHz,  $\text{CDCl}_3$ )  $\delta$  8.43 (s, 1H), 7.95 (d,  $J = 4.0$  Hz, 2H), 7.78 (s, 1H), 7.57 (t,  $J = 8.0$  Hz, 1H), 7.51–7.41 (m, 5H), 7.35 (d,  $J = 8.0$  Hz, 2H);  $^{13}\text{C}$  NMR (100 MHz,  $\text{CDCl}_3$ )  $\delta$  189.3, 142.3, 141.5, 136.8, 133.8, 131.2, 130.8, 129.3 (2C), 129.1 (2C), 128.77 (2C), 128.73 (2C), 119.2.

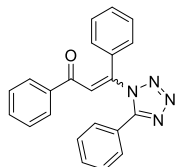

**(Z/E)-1,3-diphenyl-3-(5-phenyl-1H-tetrazol-1-yl)prop-2-en-1-one (F).** 289 mg, 82% yield; yellow solid.  $^1\text{H}$  NMR (400 MHz,  $\text{CDCl}_3$ )  $\delta$  8.24–8.21 (m, 1H), 8.06–7.85 (m, 3H), 7.58–7.36 (m, 12H);  $^{13}\text{C}$  NMR (100 MHz,  $\text{CDCl}_3$ )  $\delta$  190.2, 165.2, 145.0, 137.1, 133.6, 133.5, 131.4, 130.9, 130.65, 130.59, 130.54, 130.1, 129.1, 129.0, 128.8, 128.79, 128.7, 128.6, 128.4, 128.3, 127.6, 127.2, 127.1, 126.6, 122.3, 119.3.

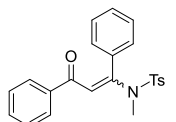

**(Z/E)-N,4-dimethyl-N-(3-oxo-1,3-diphenylprop-1-en-1-yl)benzenesulfonamide (G).** 332 mg, 85% yield; yellow solid.  $^1\text{H}$  NMR (400 MHz,  $\text{CDCl}_3$ )  $\delta$  7.87 (d,  $J = 4.0$  Hz, 1H), 7.79 (d,  $J = 8.0$  Hz, 1H), 7.73 (d,  $J = 8.0$  Hz, 1H), 7.61 (d,  $J = 8.0$  Hz, 1H), 7.55–7.52 (m, 1H), 7.46–7.36 (m, 4H), 7.29 (t,  $J = 8.0$  Hz, 1H), 7.24–7.11 (m, 4H), 6.97 (s, 0.5H), 6.58 (s, 0.5H), 3.19 (s, 1.5H), 3.06 (s, 1.5H), 2.48 (s, 1.5H), 2.37 (s, 1.5H);  $^{13}\text{C}$  NMR (100 MHz,  $\text{CDCl}_3$ )  $\delta$  192.7, 189.2, 151.4, 150.3, 144.3, 143.5, 138.1, 137.6, 137.4, 136.0, 135.3, 134.8, 132.8, 132.7, 130.3, 129.8, 129.7, 129.3, 129.2, 128.8, 128.7, 128.5, 128.4, 128.24, 128.22, 127.98, 127.93, 127.77, 127.7, 120.9, 119.9, 38.5, 37.3, 21.6, 21.5.

#### References

[1] (a) Q. H. Teng, X. J. Peng, Z. Y. Mo, Y. L. Xu, H. T. Tang, H. S. Wang, H. B. Sun, Y. M. Pan, *Green Chem.*, 2018, **20**, 2007–2012; (b) R. Shankar, A. K. Jha, U. S. Singh, K. Hajela, *Tetrahedron lett.*, 2006, **47**, 3077–3079.

# HRMS spectra of compounds B-H.

Sample Name: CA-HB-7 Ion Source: UHOSpray DA / AFU1 Mass Spectrometer: tripleTOF 6000 (AB SCIEX)  
 Acq. File: CuiXue2021-04-20.wiff Period/Expt.: Period 1, Experiment 1 INSTRUMENTS  
 Acq. Time: 10:21 Scan Mode: Zero Width Operator:  
 Acq. Date: Wednesday, May 19, 2021 Polarity/Scan Type: Positive

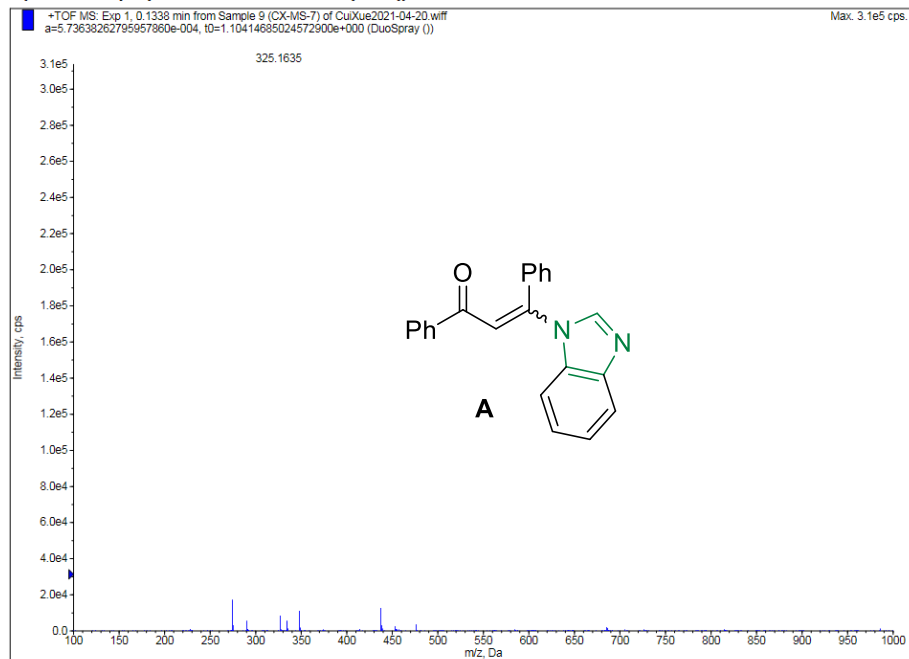

Analyst Version: 1.7.1

Page 1 of 1

Acq. File: CuiXue2021-04-20.wiff Period/Expt.: Period 1, Experiment 1 INSTRUMENTS  
 Acq. Time: 10:21 Scan Mode: Zero Width Operator:  
 Acq. Date: Wednesday, May 19, 2021 Polarity/Scan Type: Positive

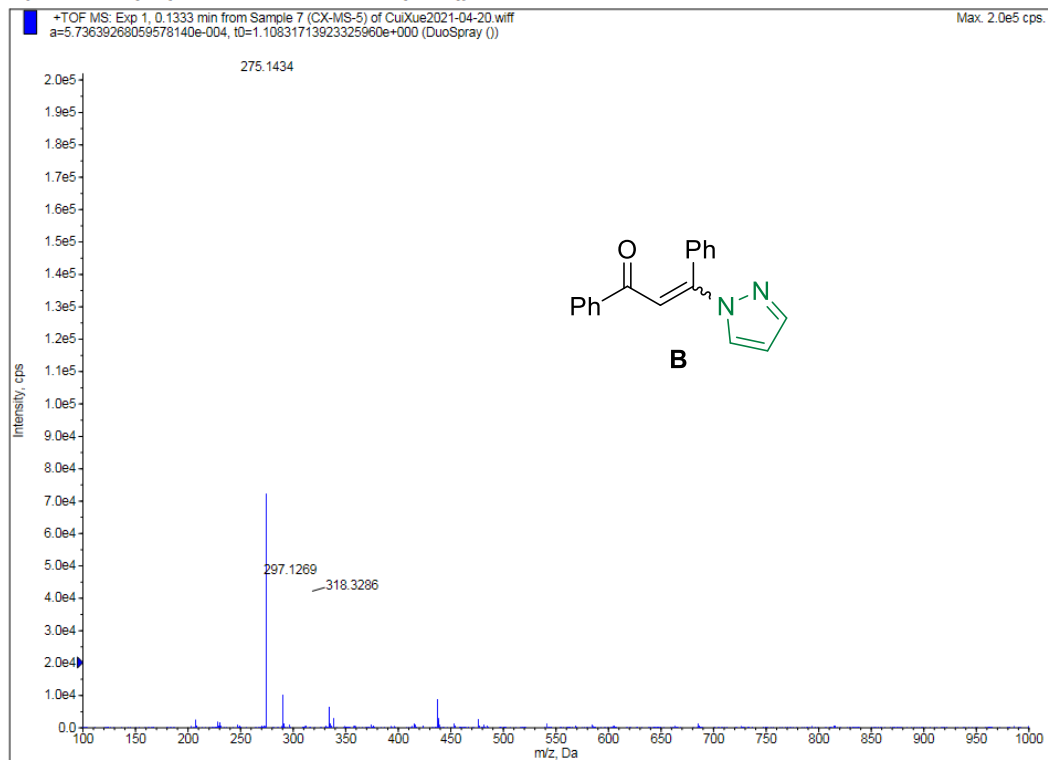

Analyst Version: 1.7.1

Page 1 of 1



+TOF MS: Exp 1, 0.1104 to 0.1442 min from Sample 4 (CuXue-MS-4) of CuXue2021-04-20.wiff  
a=5.73658571632971320e-004, tD=1.56959764544417670e+000 (DuoSpray (j))

Max. 2.5e5 cps.

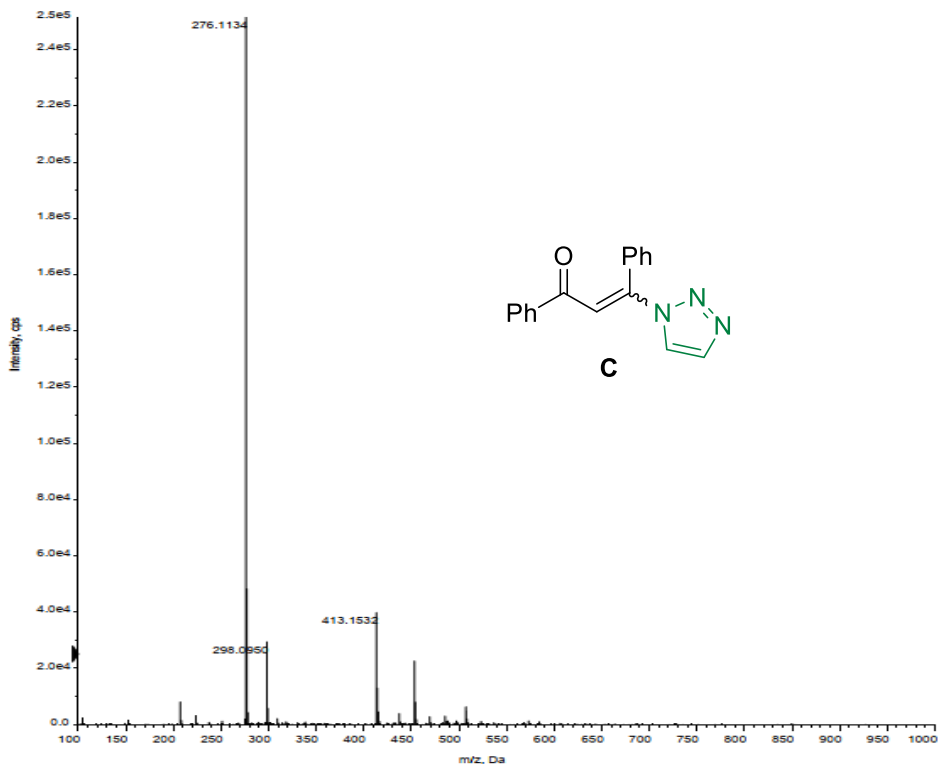

Acq. File: CuXue2021-04-20.wiff Period/Expt.: Period 1, Experiment 1 INSTRUMENTS)  
Acq. Time: 10:25 Scan Mode: Zero Width Operator:  
Acq. Date: Wednesday, May 19, 2021 Polarity/Scan Type: Positive

TIC of +TOF MS: Exp 1, from Sample 10 (CX-MS-8) of CuXue2021-04-20.wiff (DuoSpray (j)) Max. 4.9e6 cps.

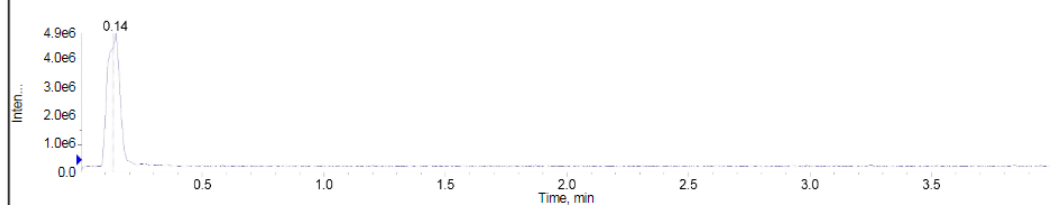

+TOF MS: Exp 1, 0.1331 min from Sample 10 (CX-MS-8) of CuXue2021-04-20.wiff  
a=5.73638432055969680e-004, tD=1.10402426408211160e+000 (DuoSpray (j)) Max. 1.4e5 cps.

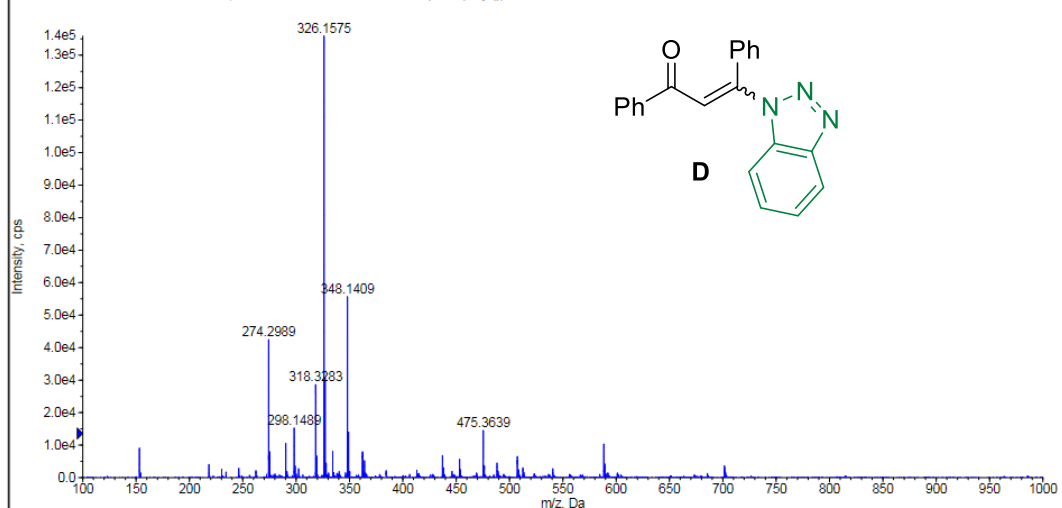

+TOF MS: Exp 1, 0.1217 min from Sample 3 (CuXue-MS-3) of CuXue2021-04-20.wiff  
a=5.73659149803123370e-004, t0=1.57243241750433140e+000 (DuoSpray (J))

Max. 1.1e5 cps.

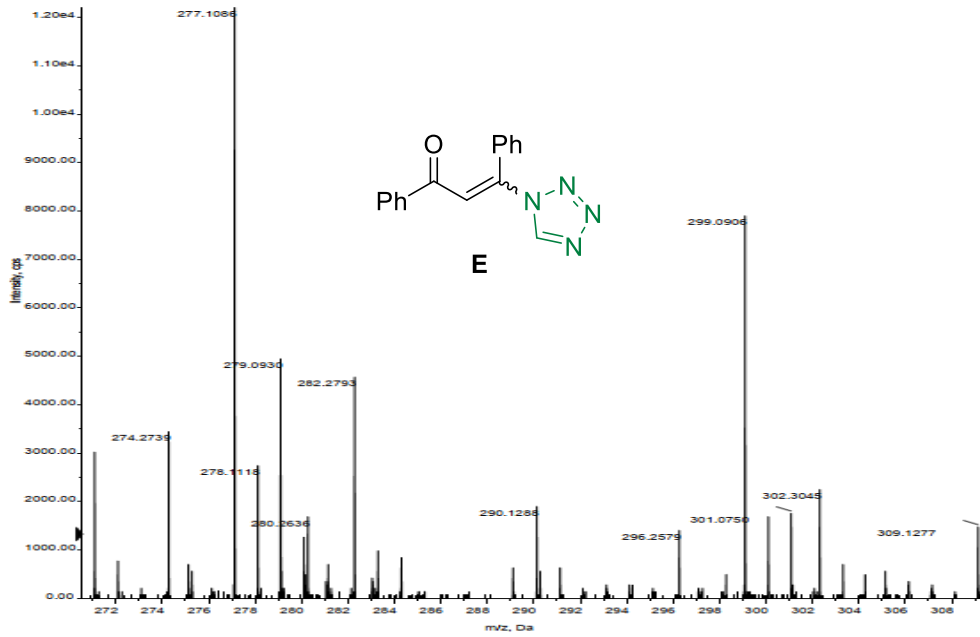

+TOF MS: Exp 1, 0.1219 to 0.1446 min from Sample 1 (CuXue-MS-1) of CuXue2021-04-20.wiff  
a=5.73662368118204280e-004, t0=1.58601174291754200e+000 (DuoSpray (J))

Max. 1.1e5 cps.

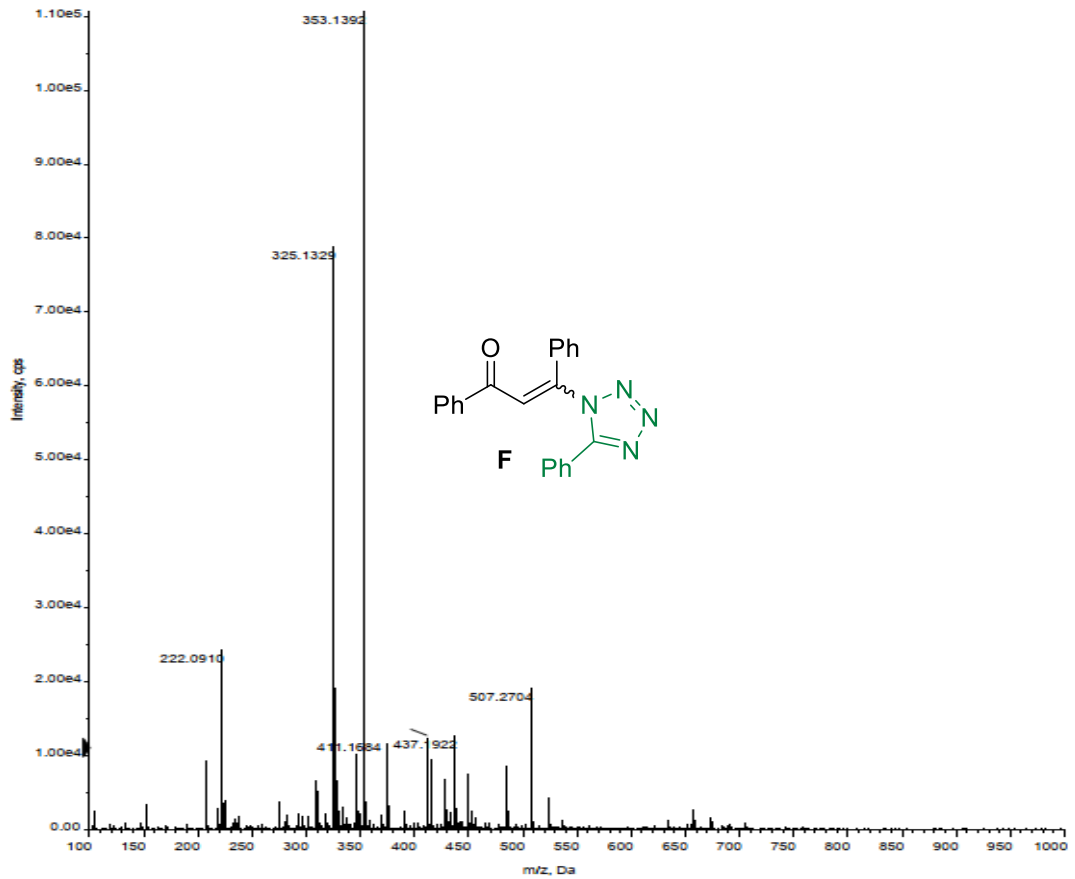

Acq. File: CuiXue2021-04-20.wiff  
Acq. Time: 10:26  
Acq. Date: Wednesday, May 19, 2021

Period/Expt.: Period 1, Experiment 1  
Scan Mode: Zero Width  
Polarity/Scan Type: Positive

INSTRUMENTS)  
Operator:

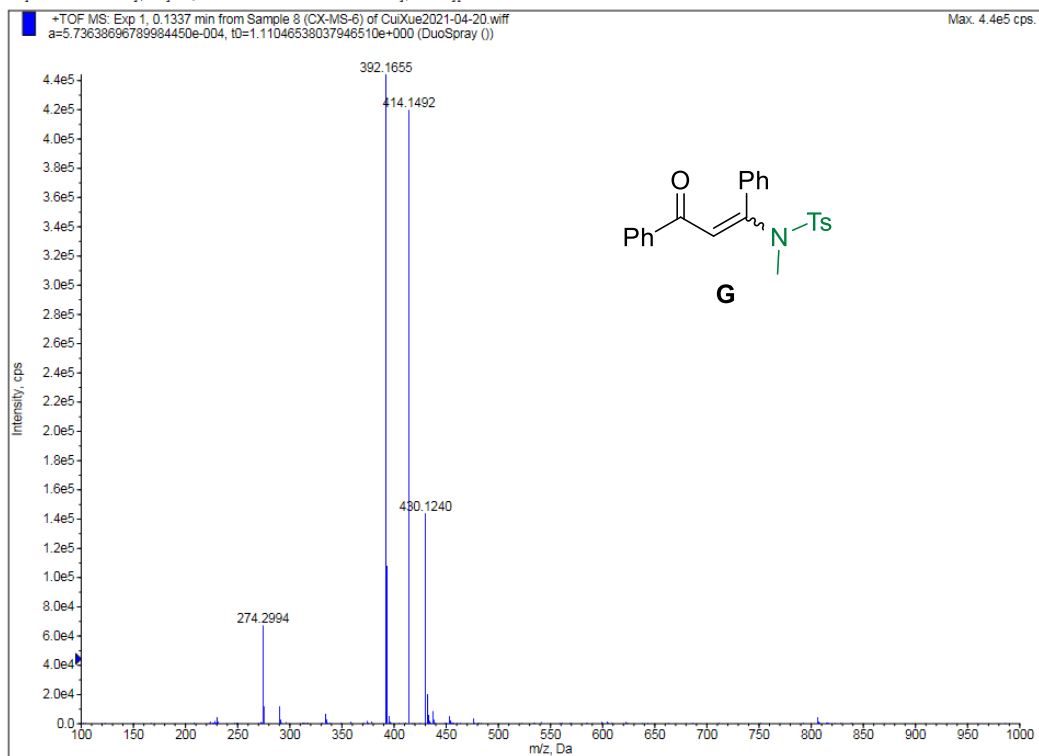

$^1\text{H}$  NMR and  $^{13}\text{C}$  NMR spectra of compounds **1a–1s** and **B–H**.

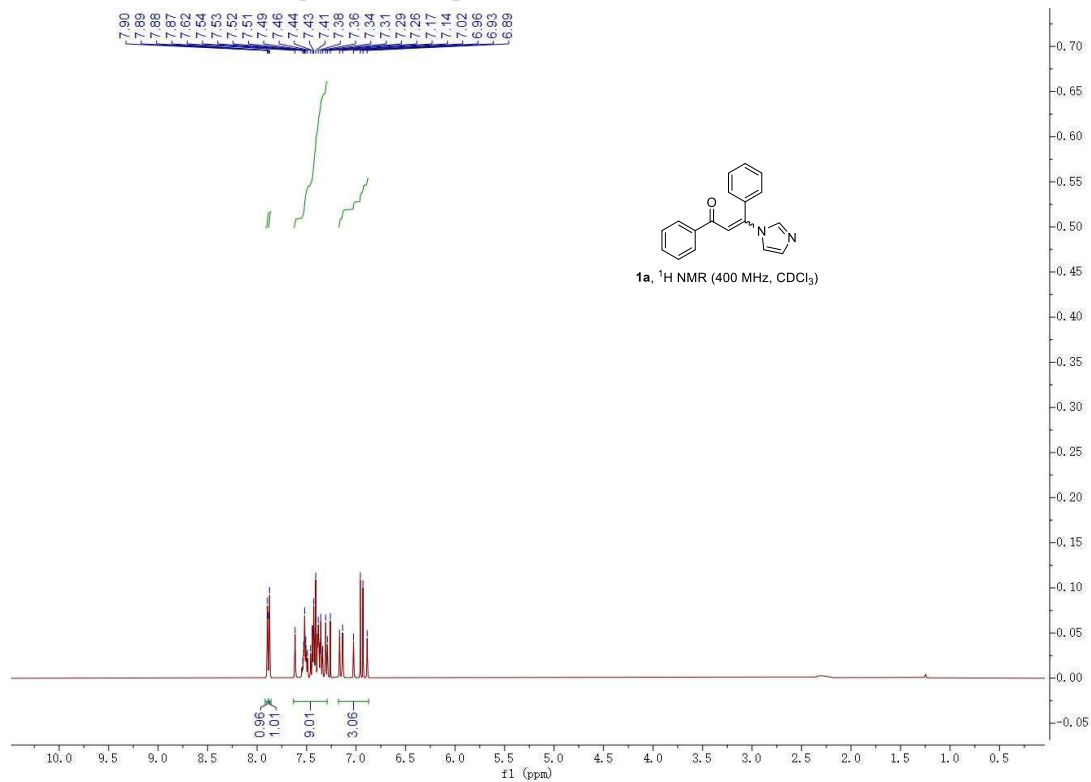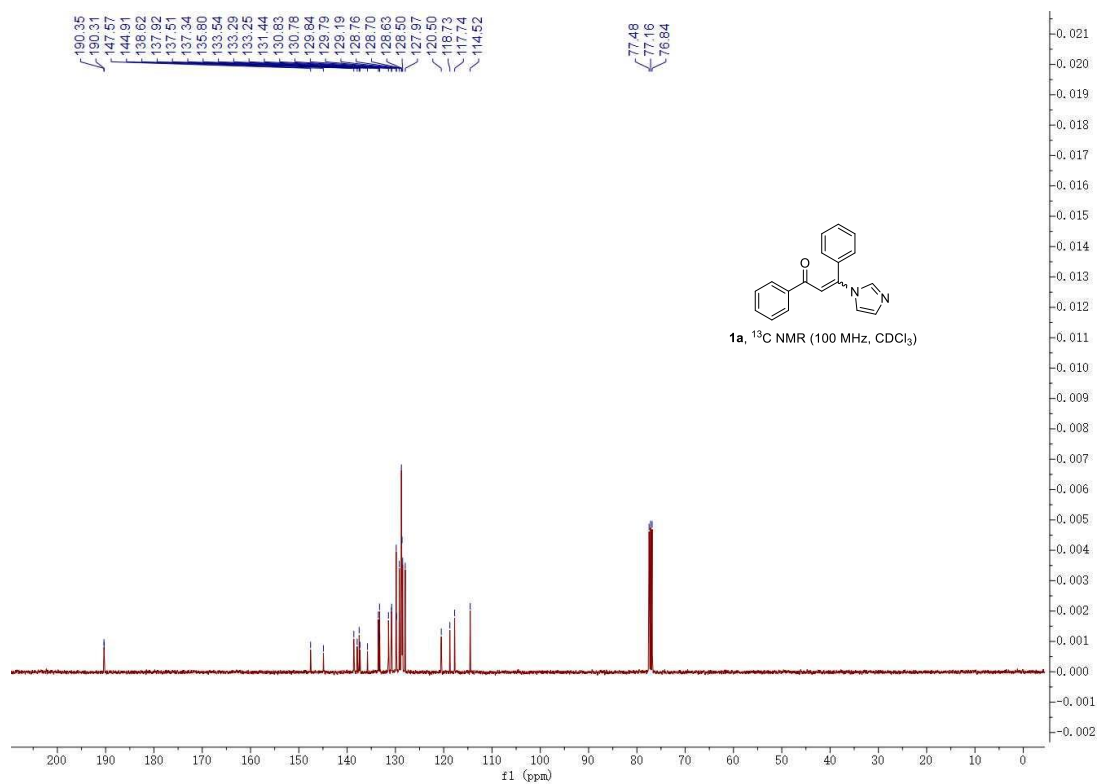

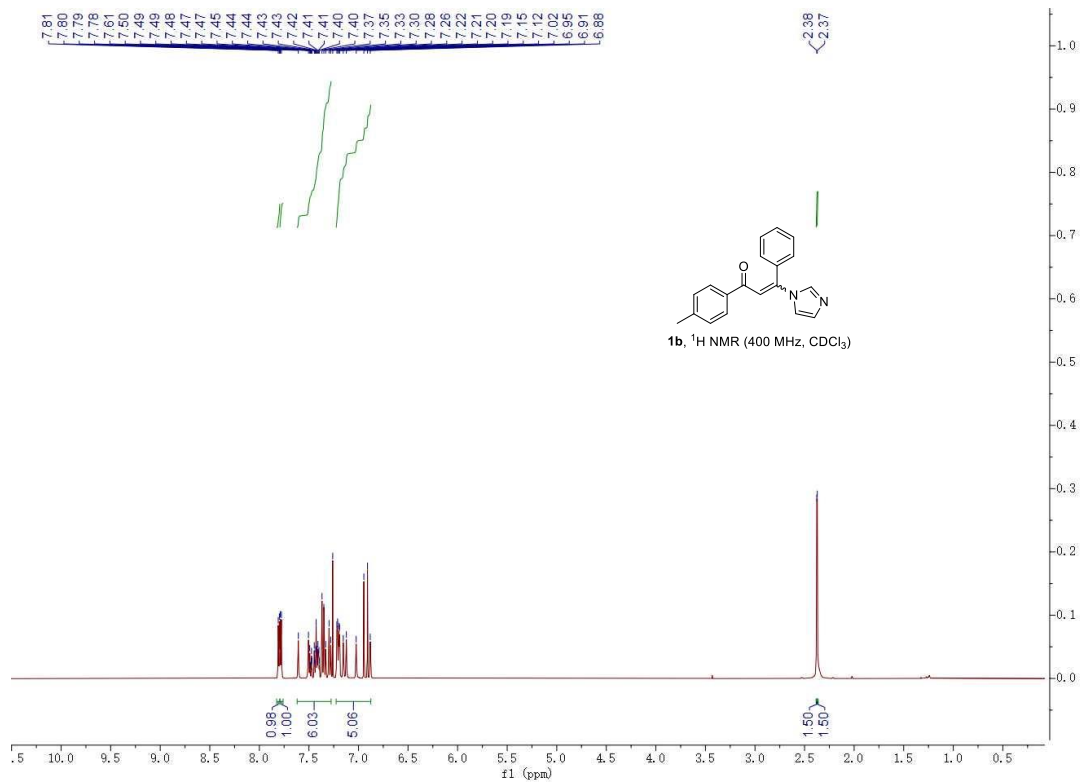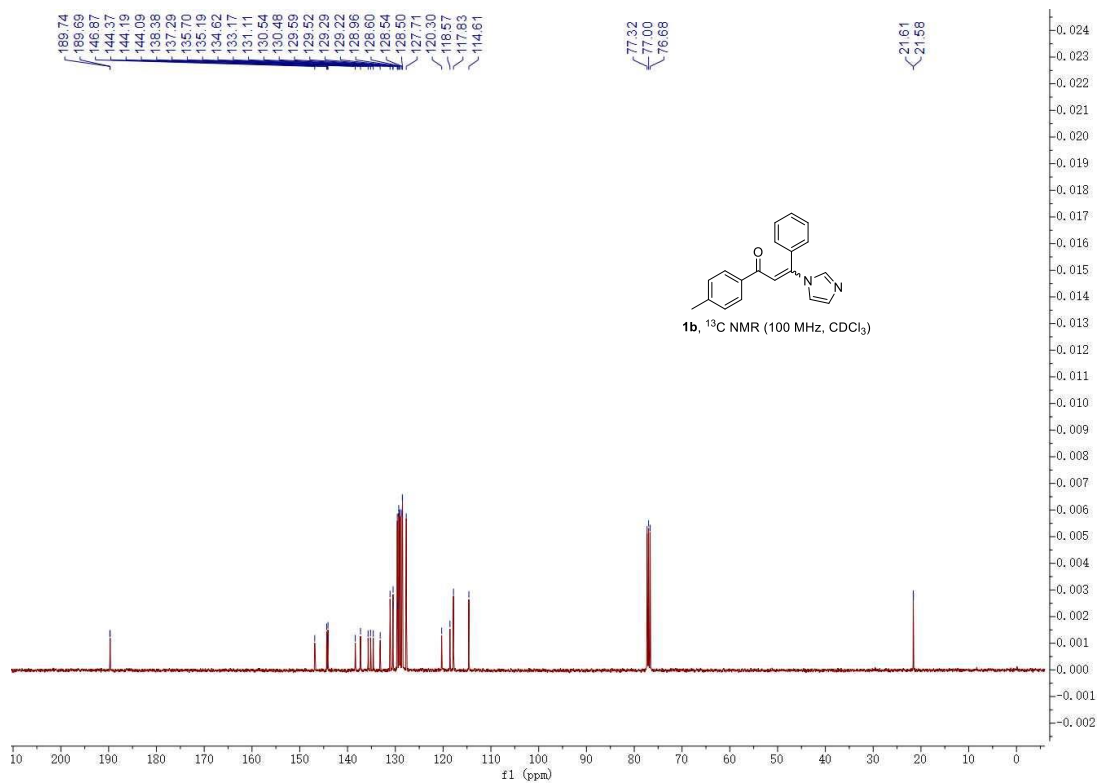

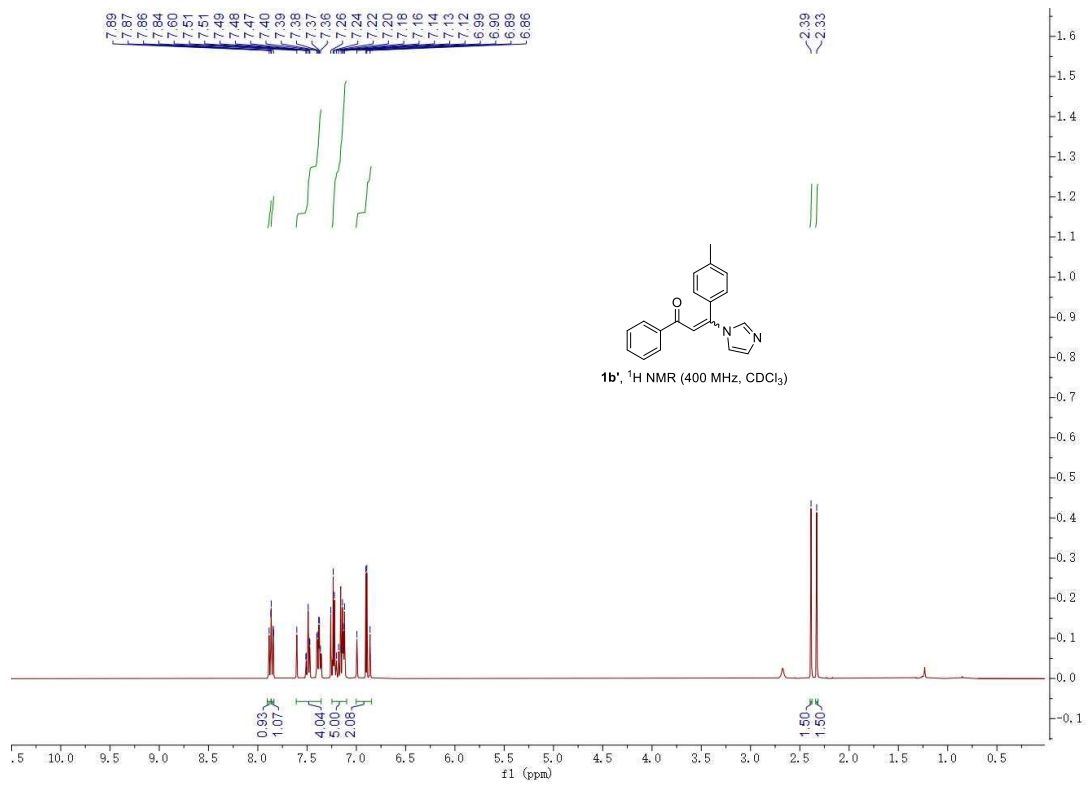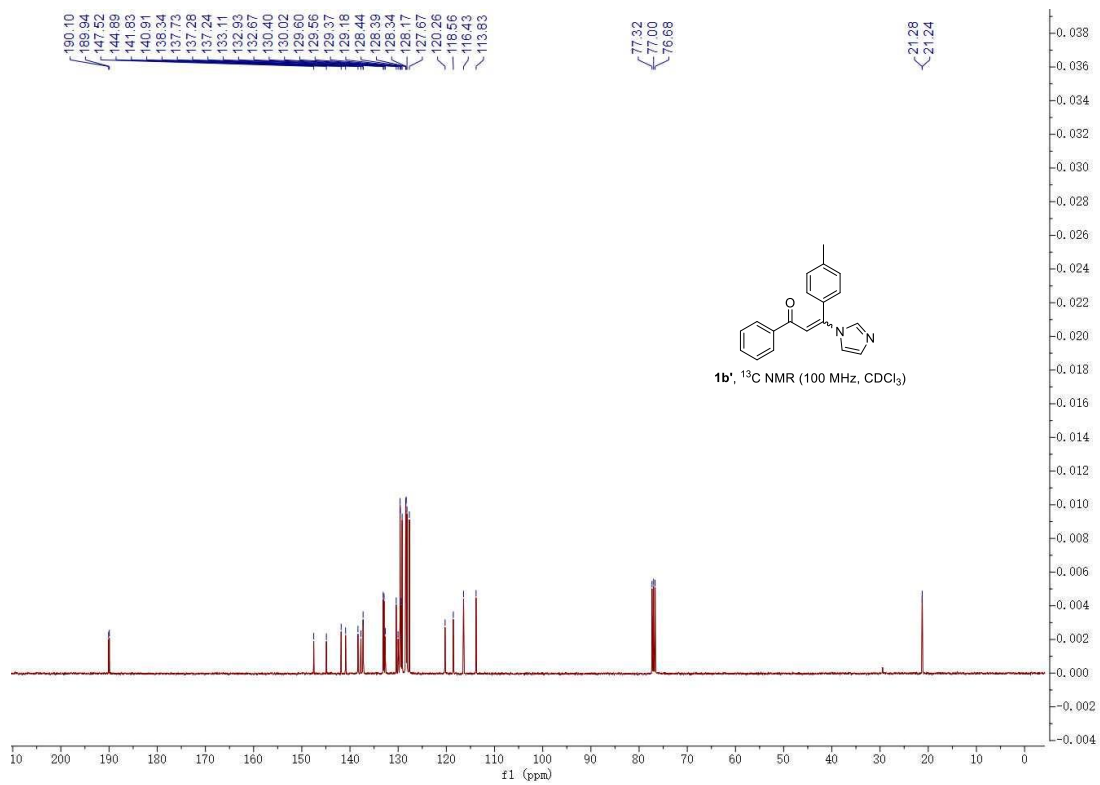

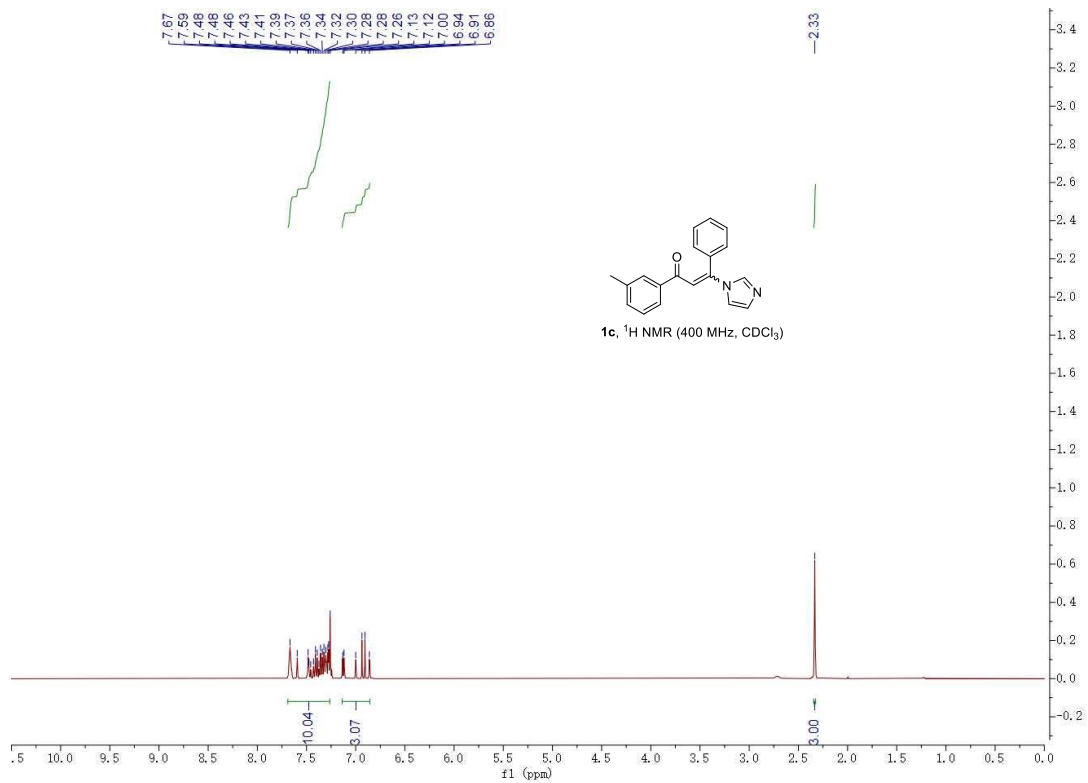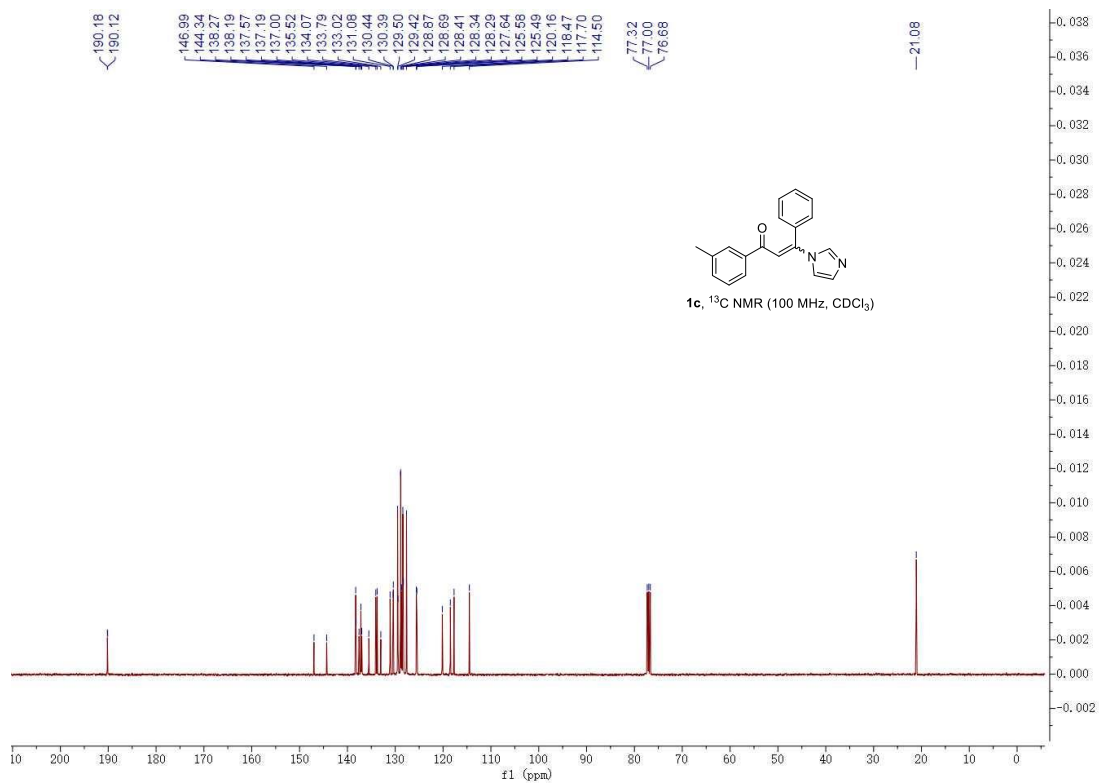

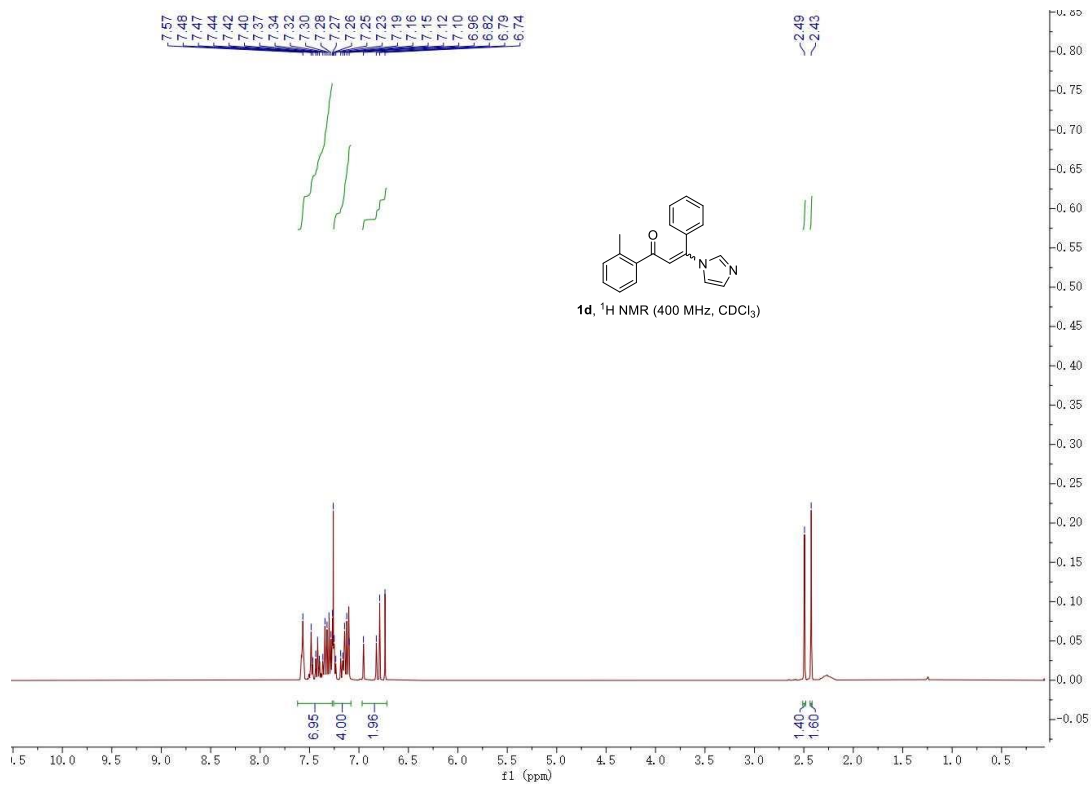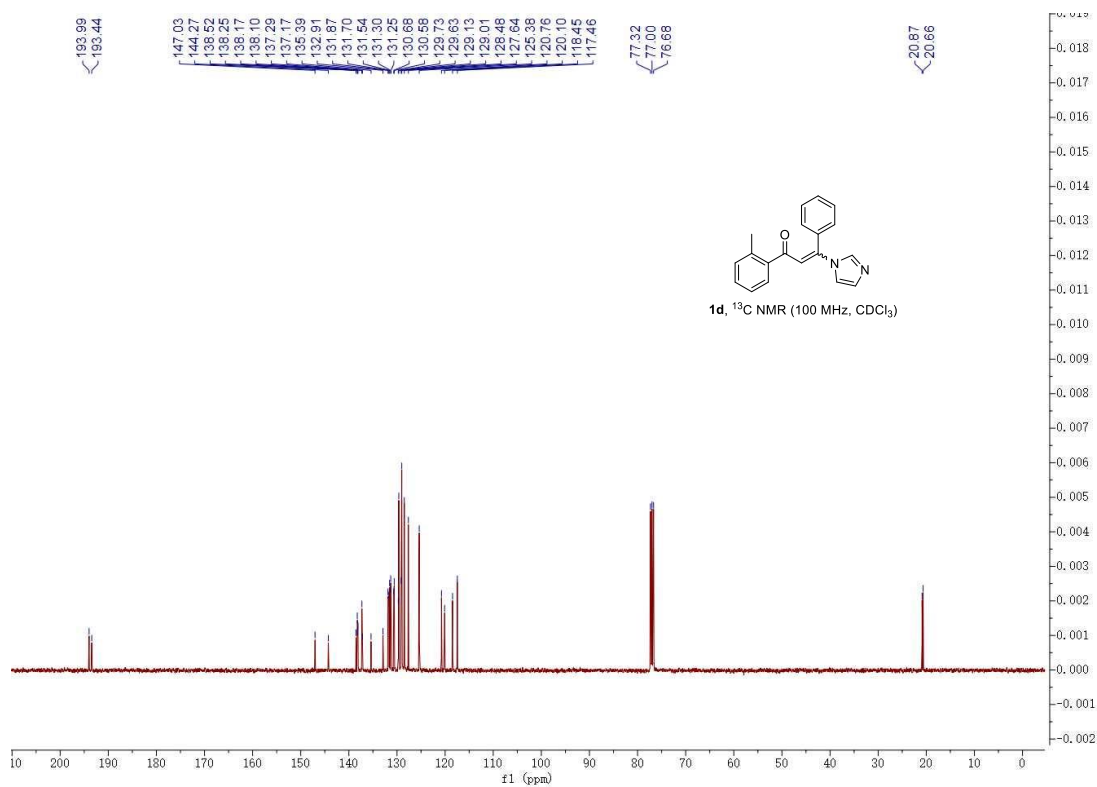



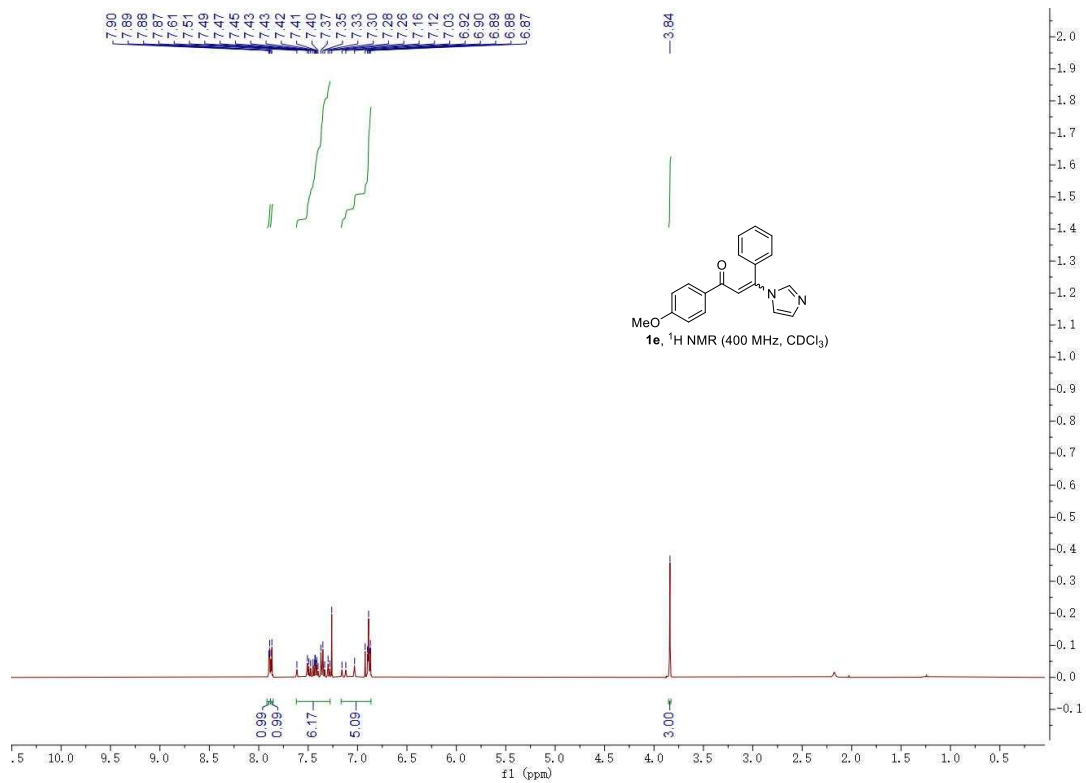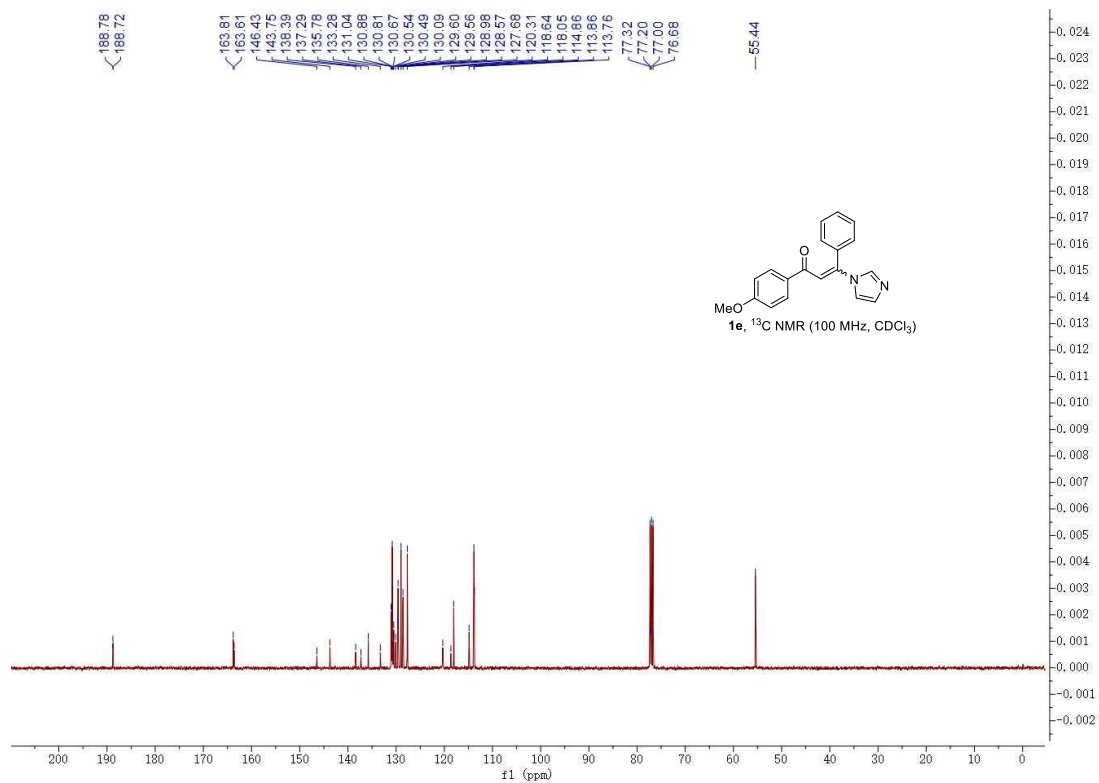

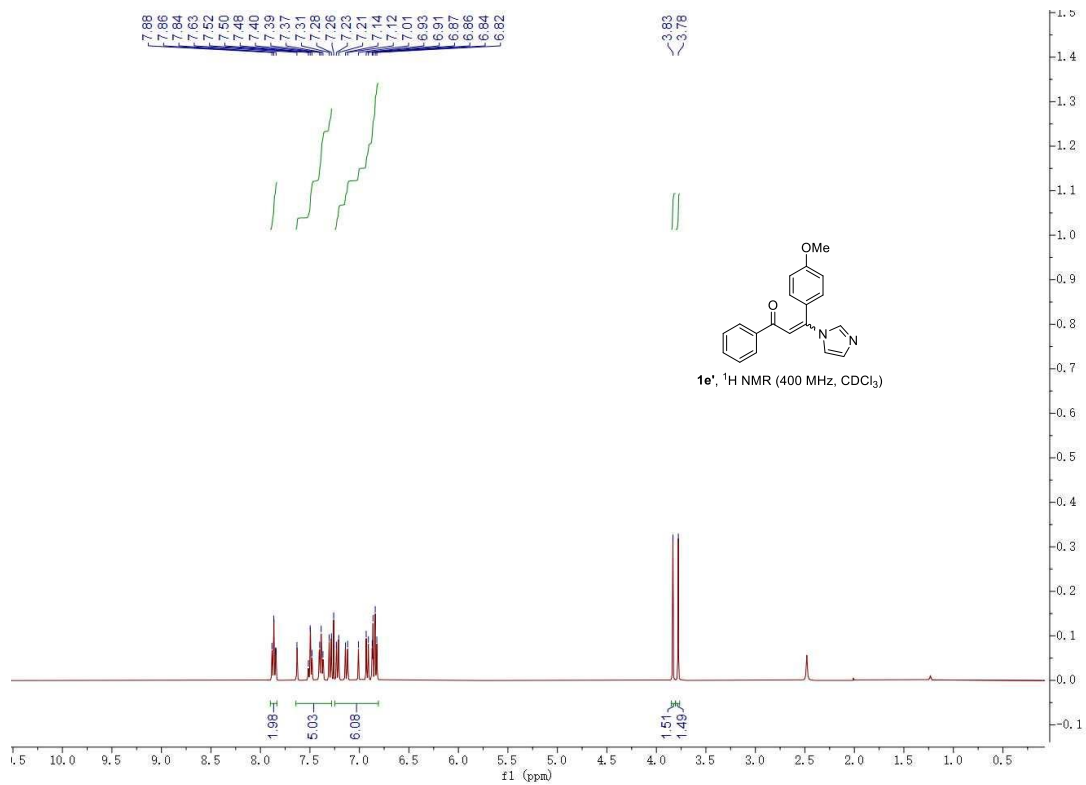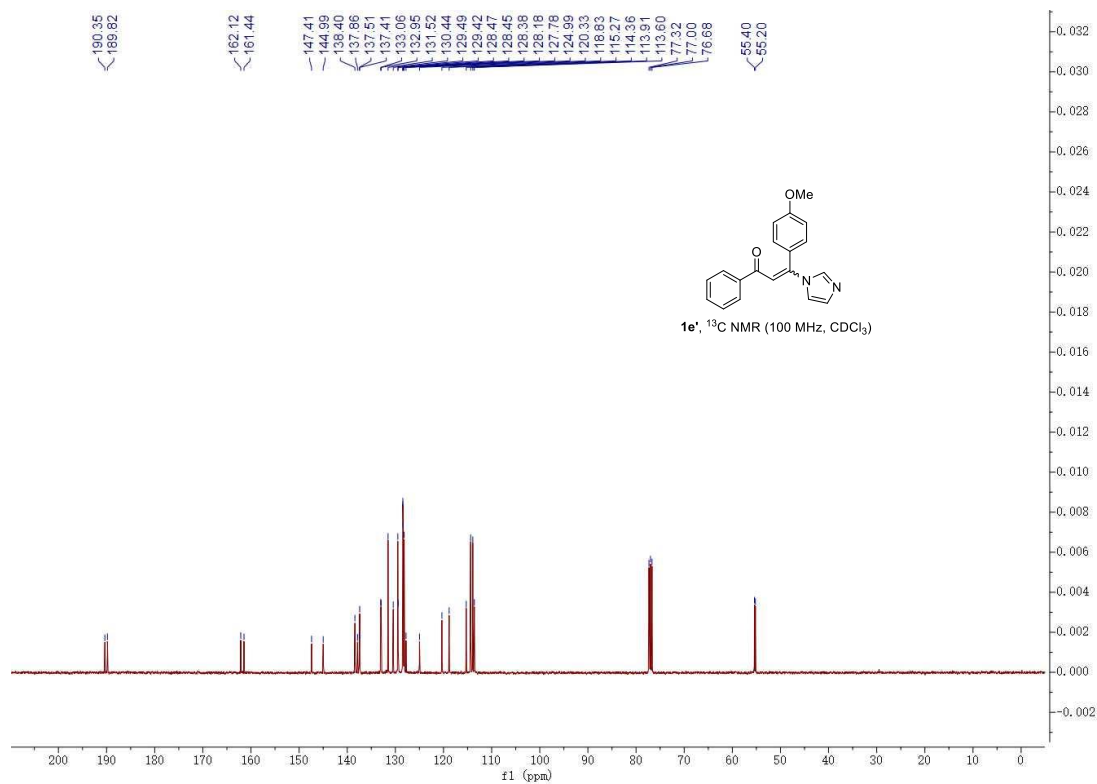

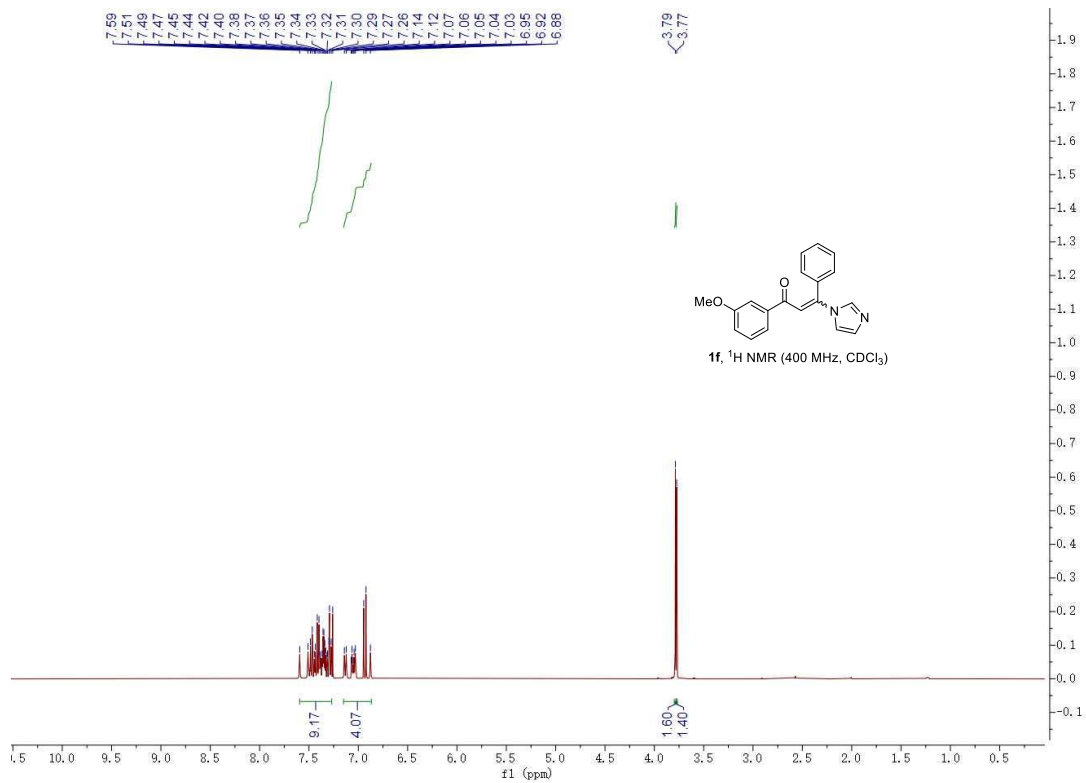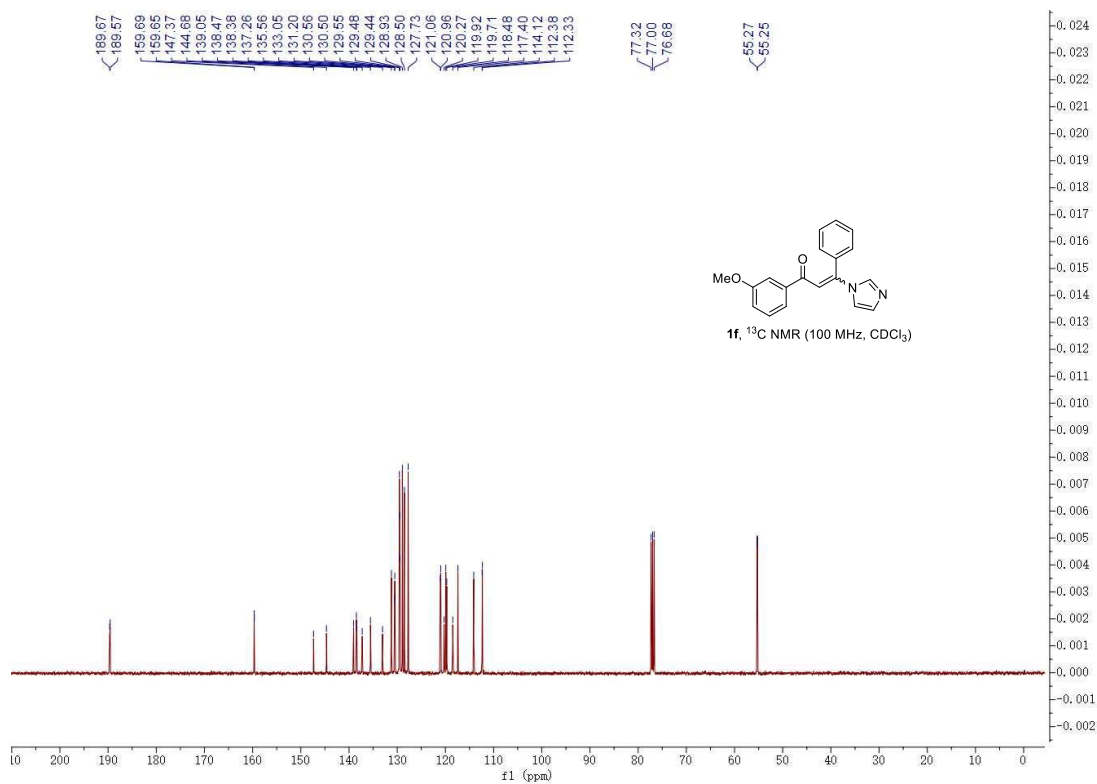

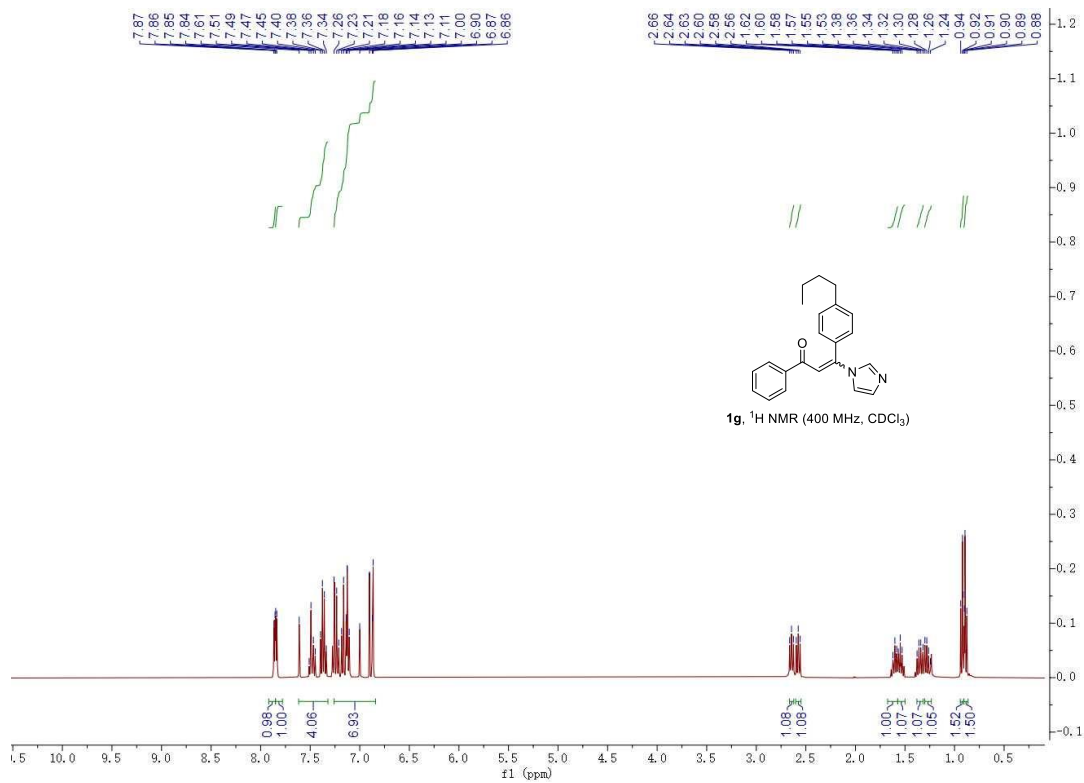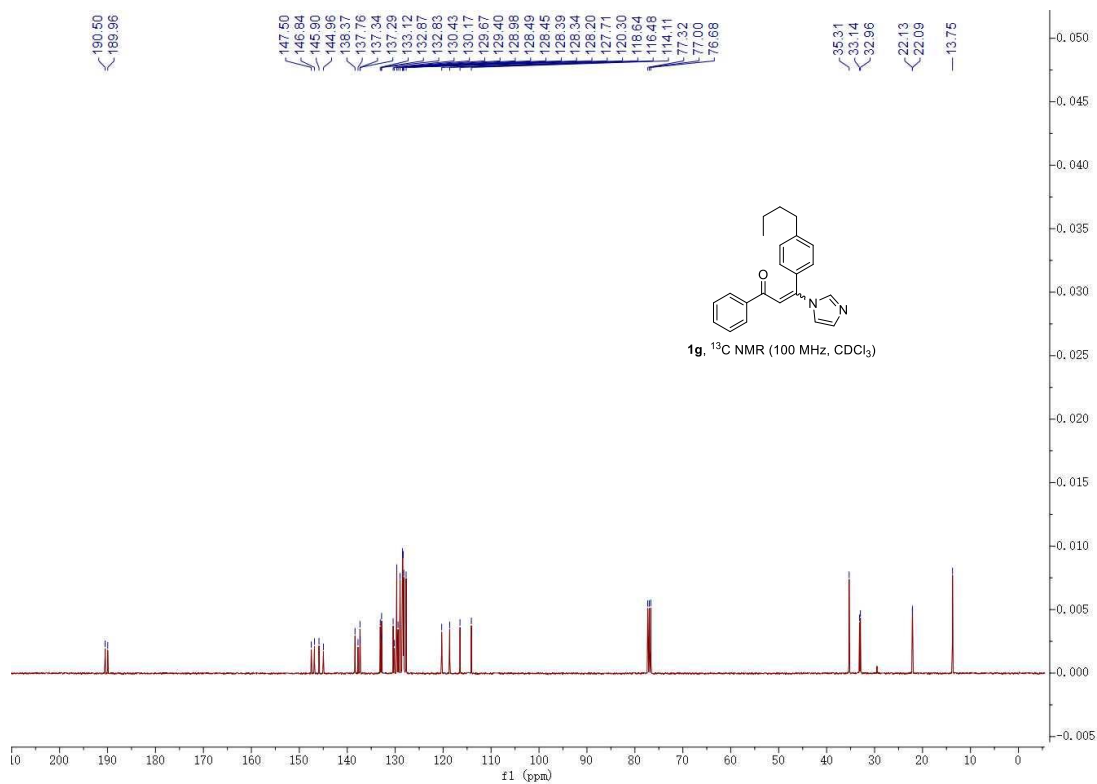

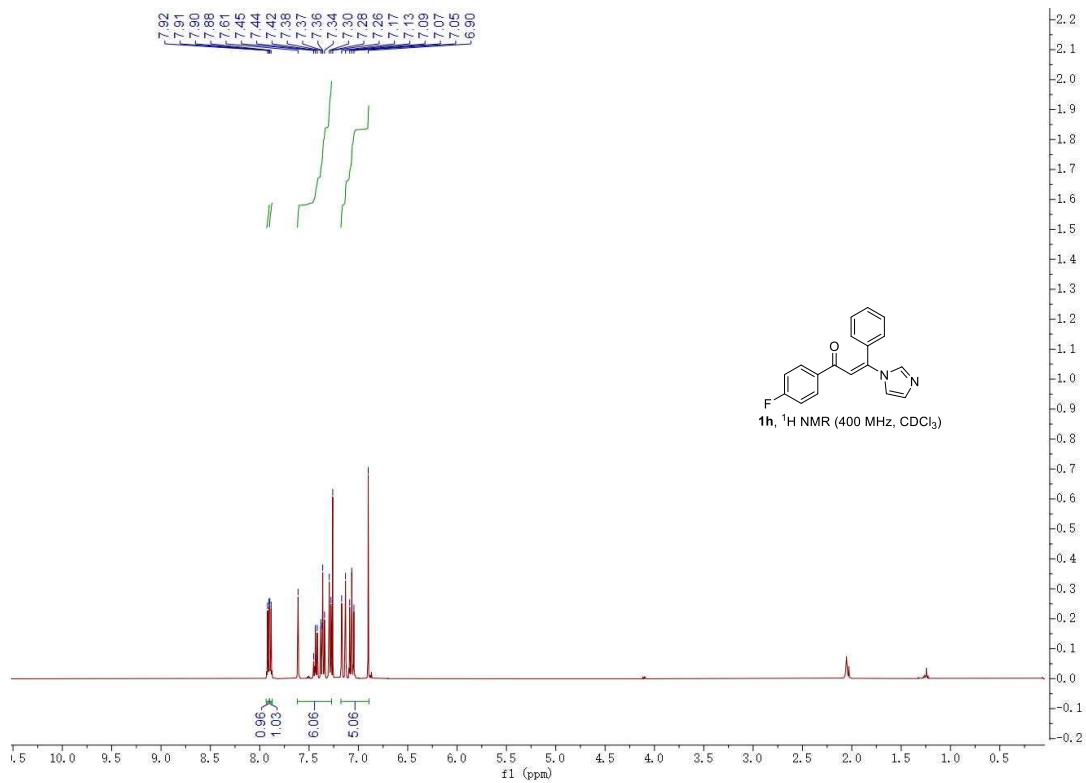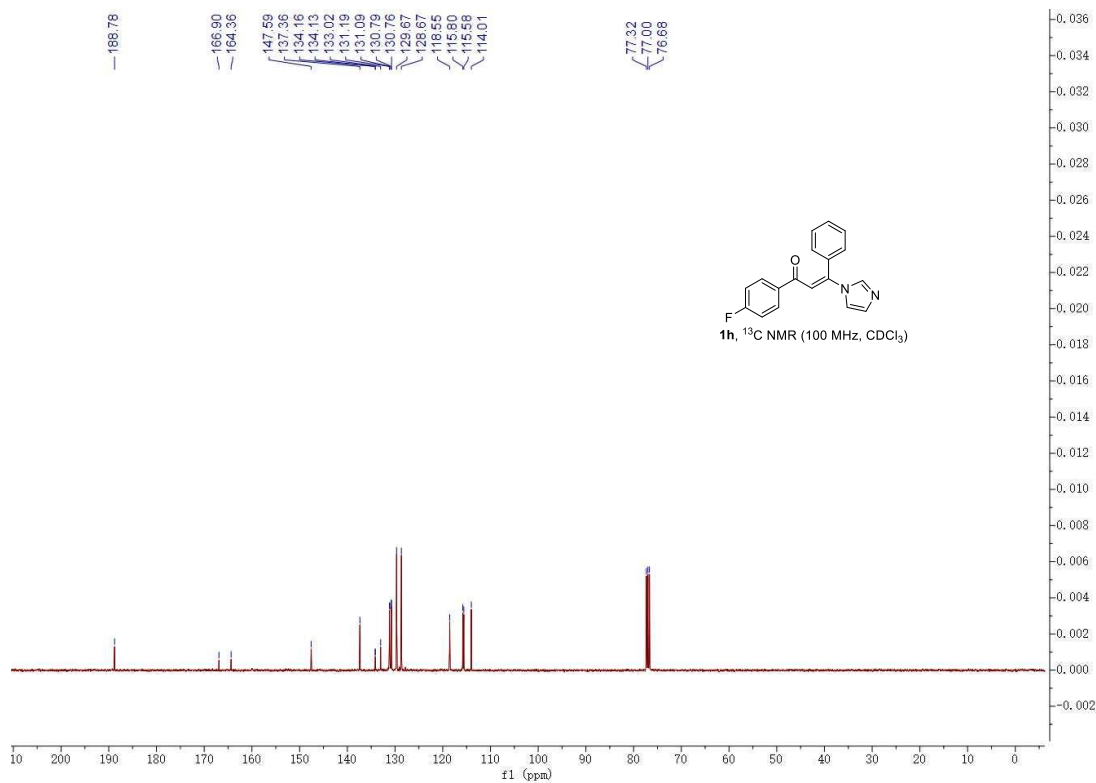

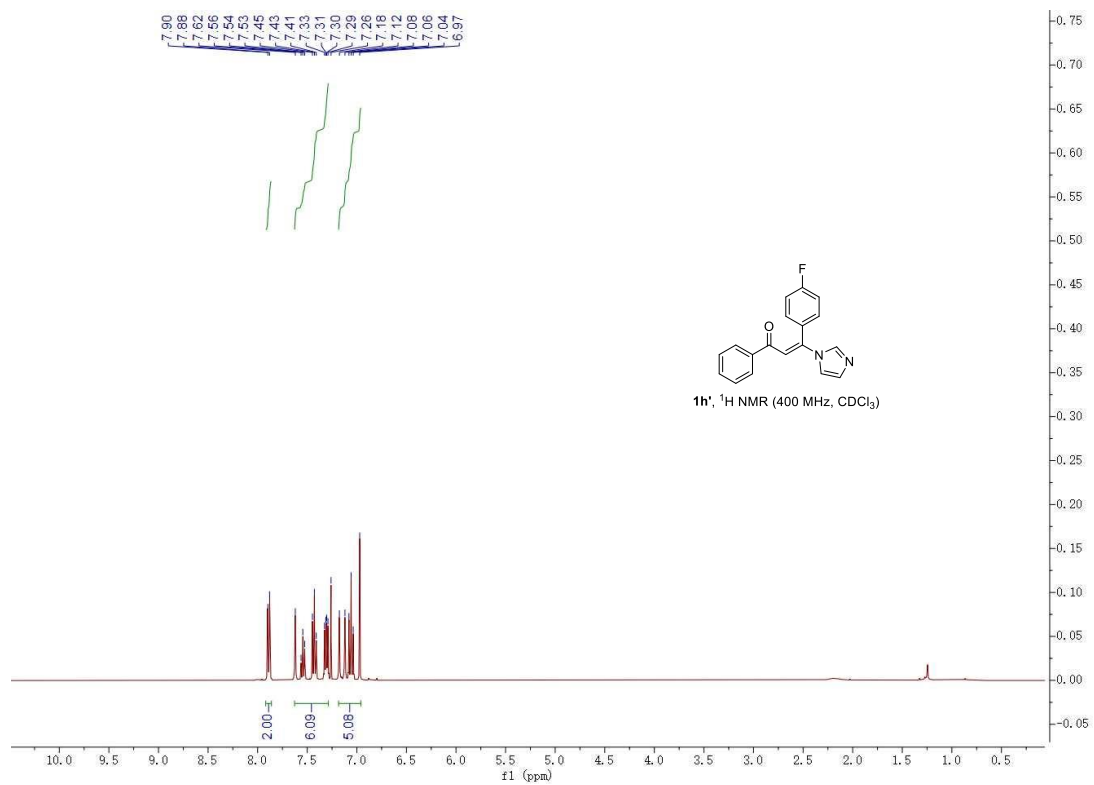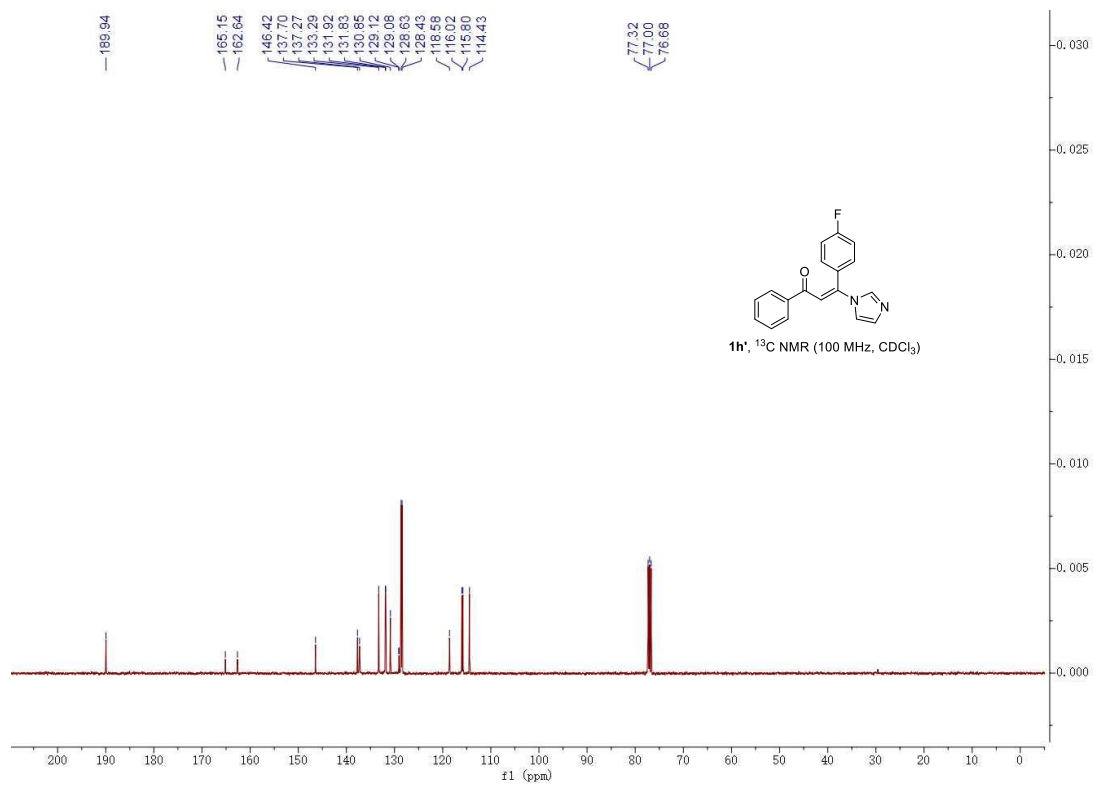

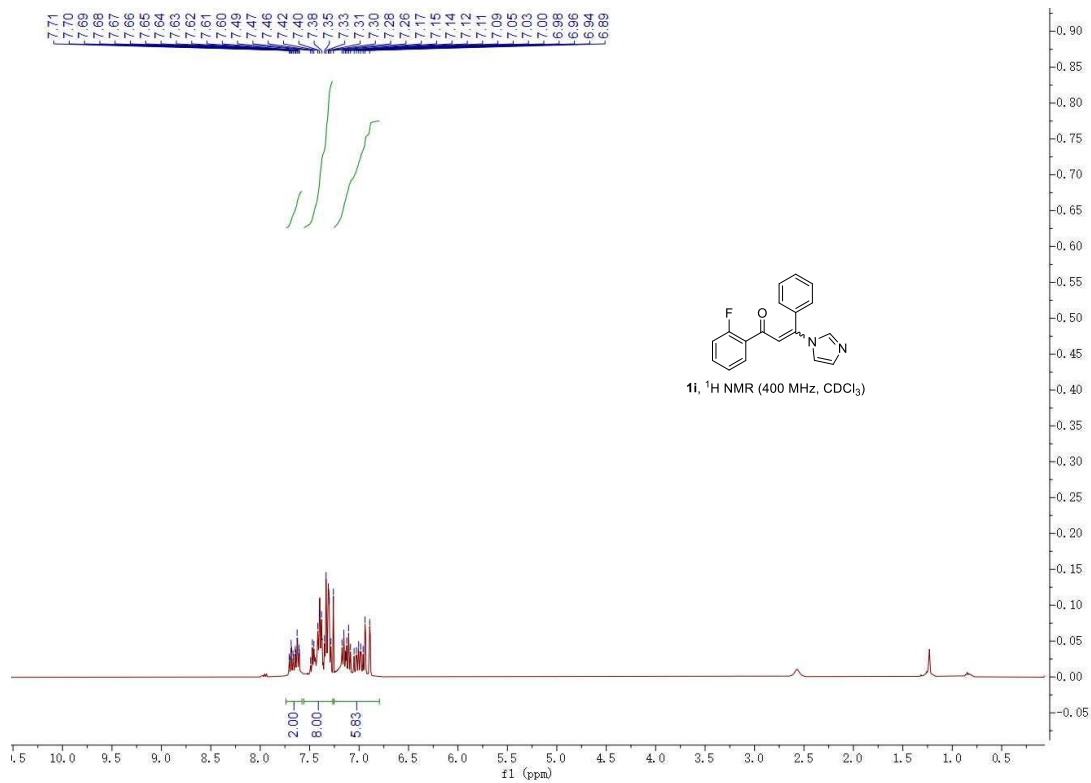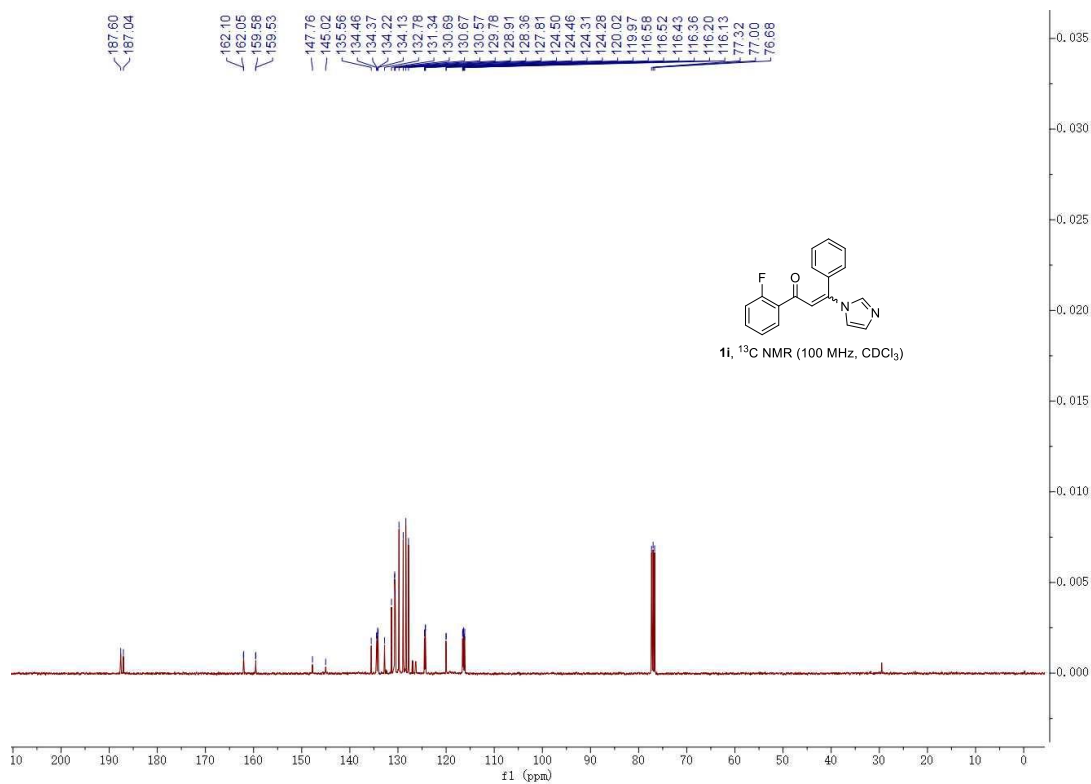

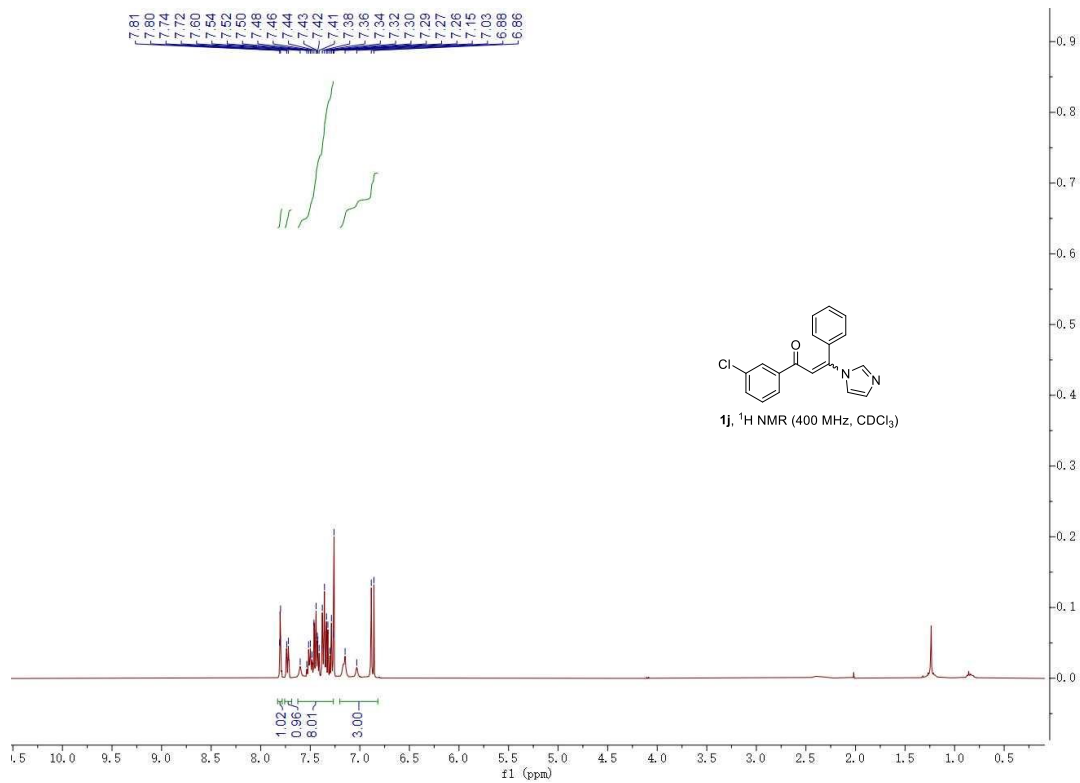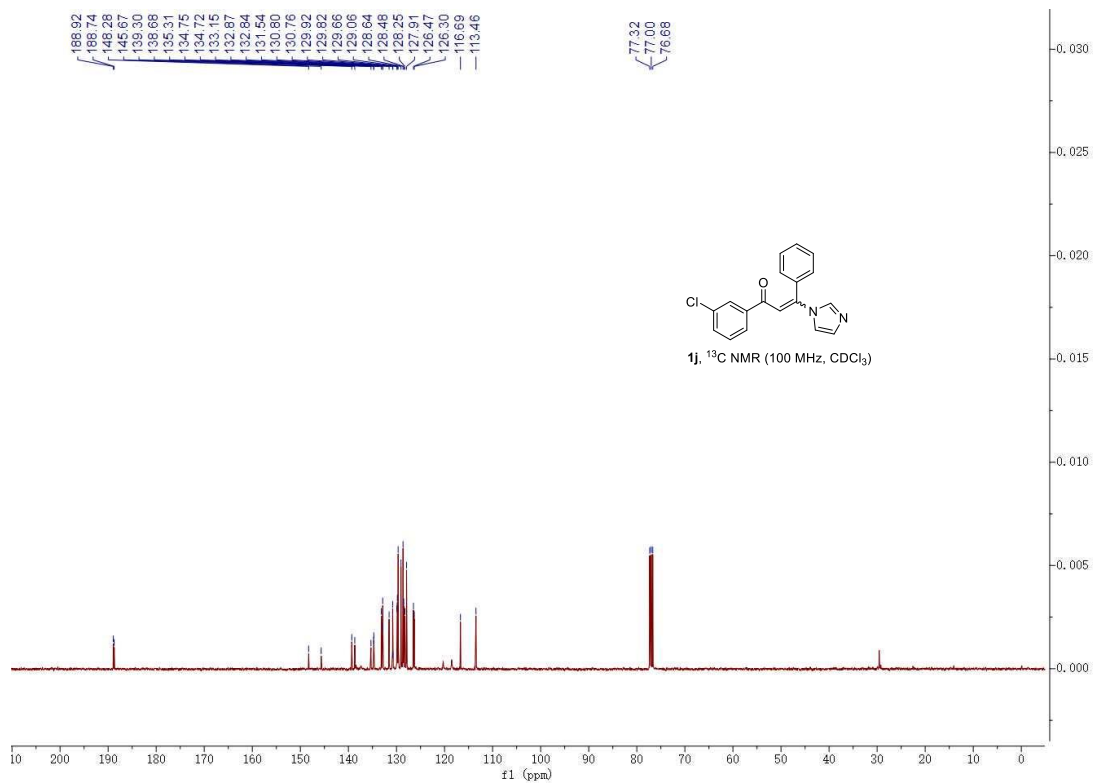



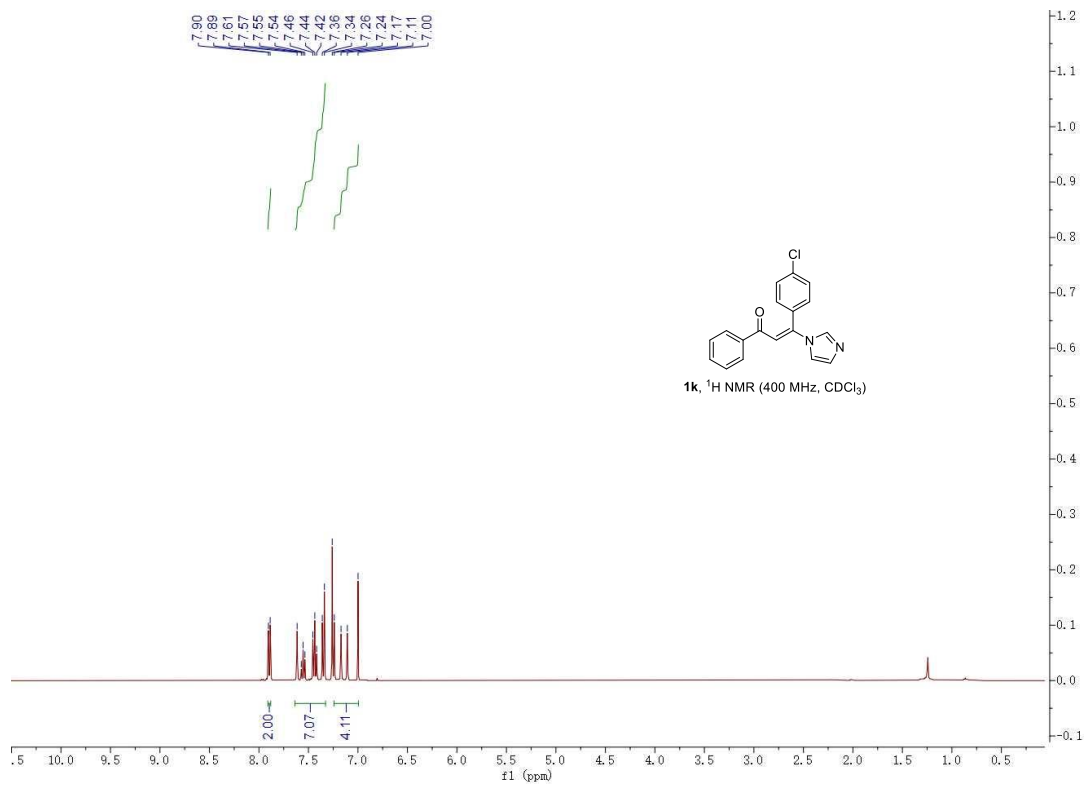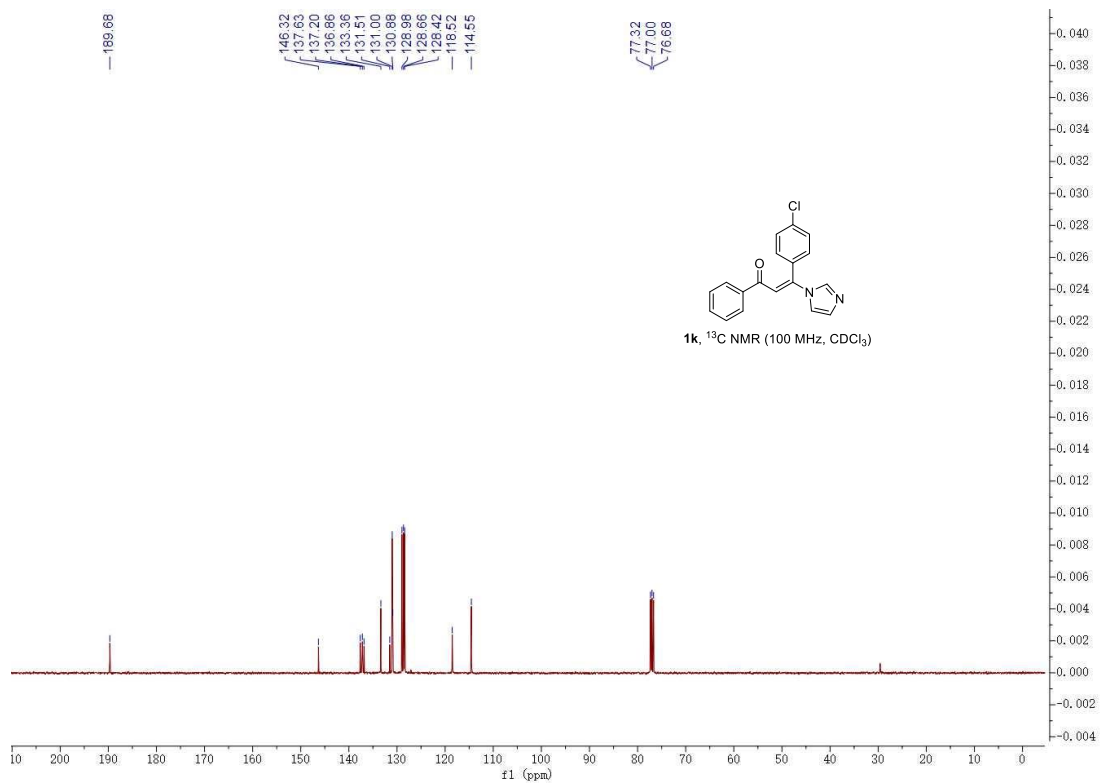

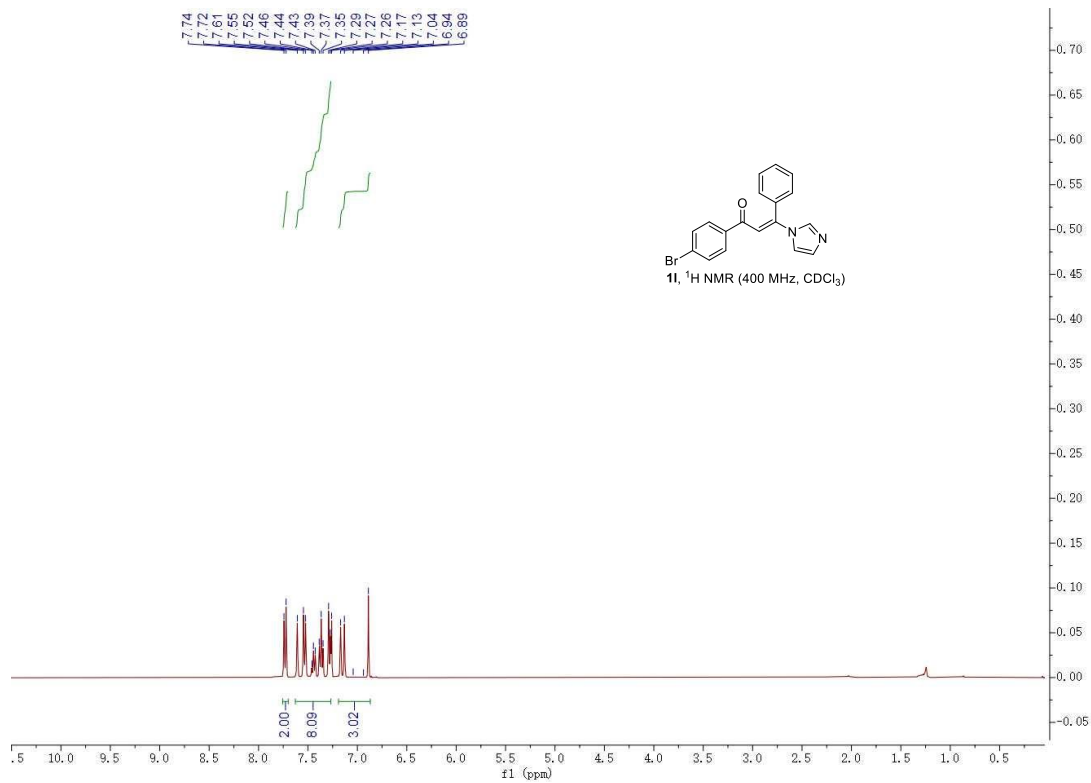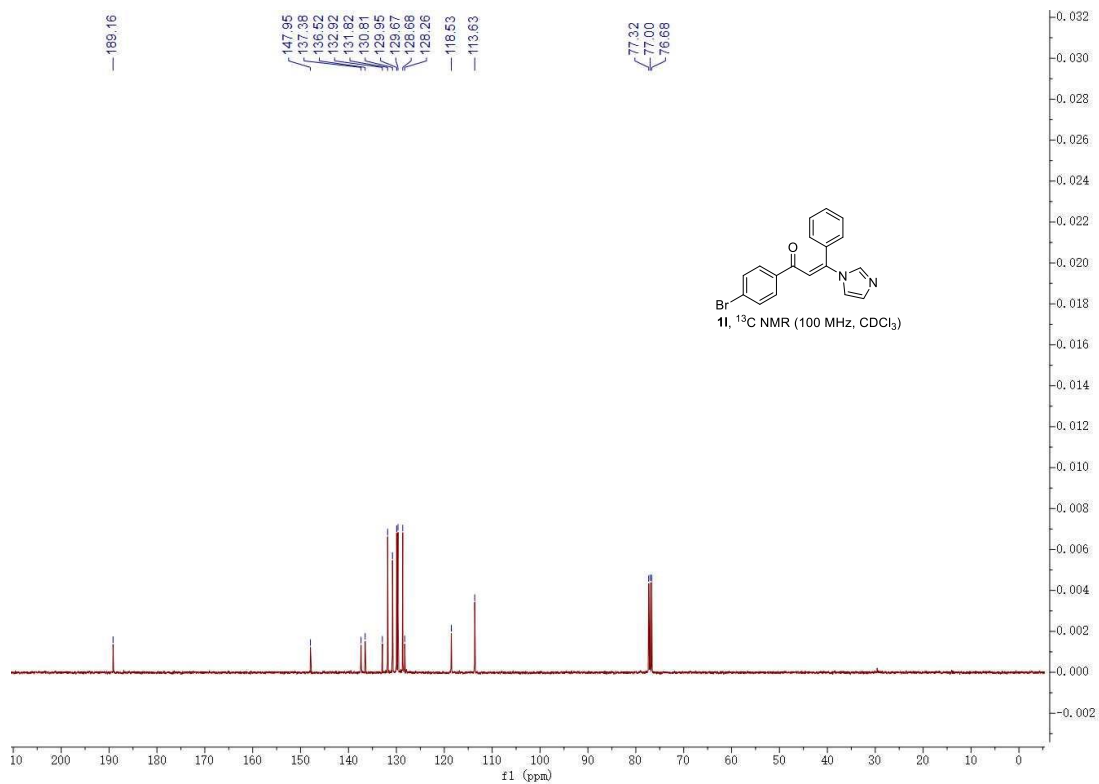

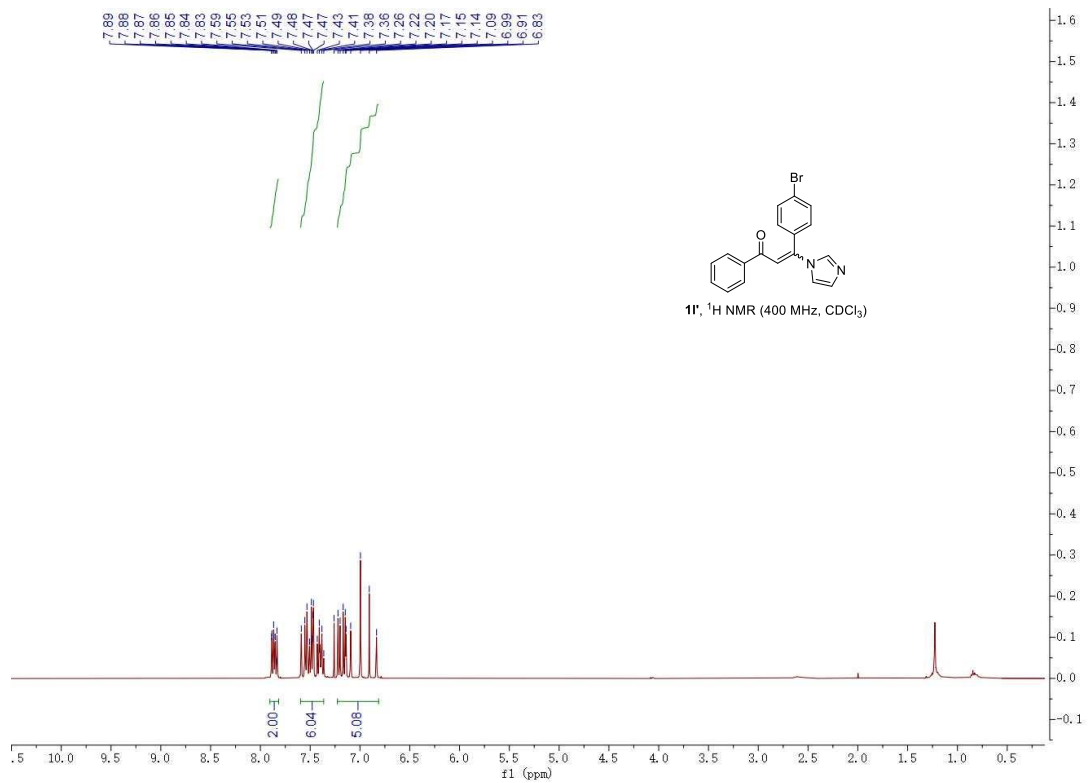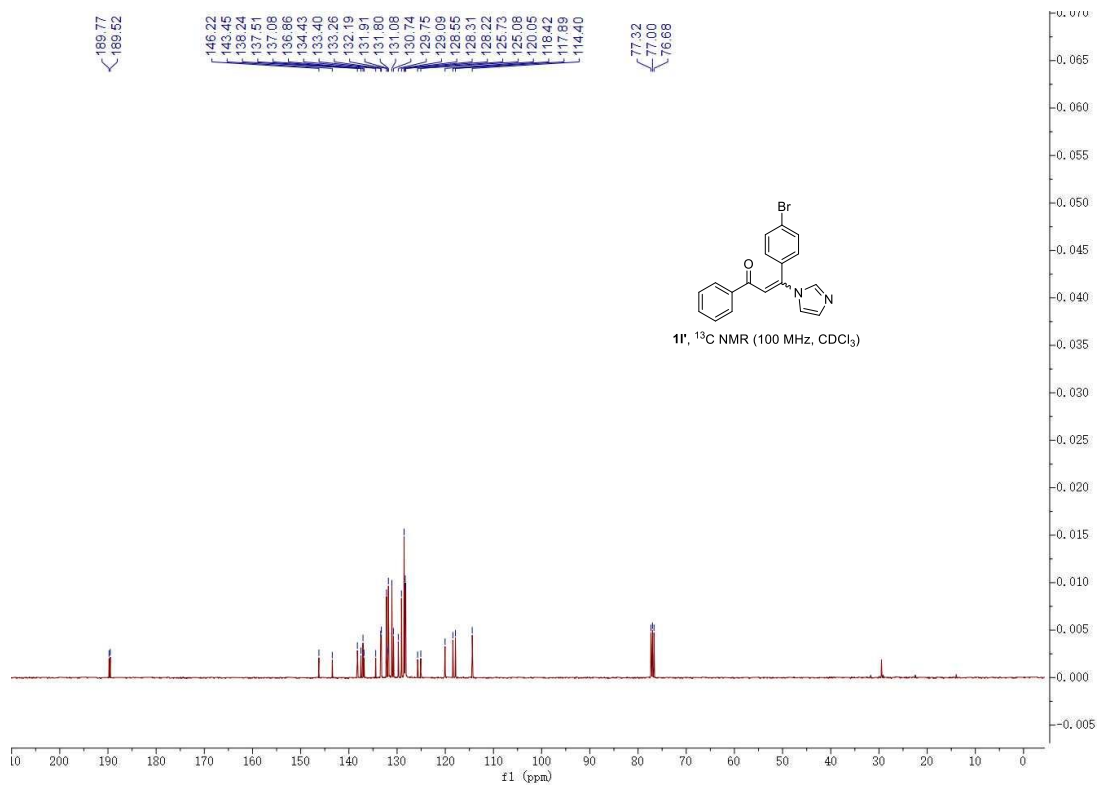

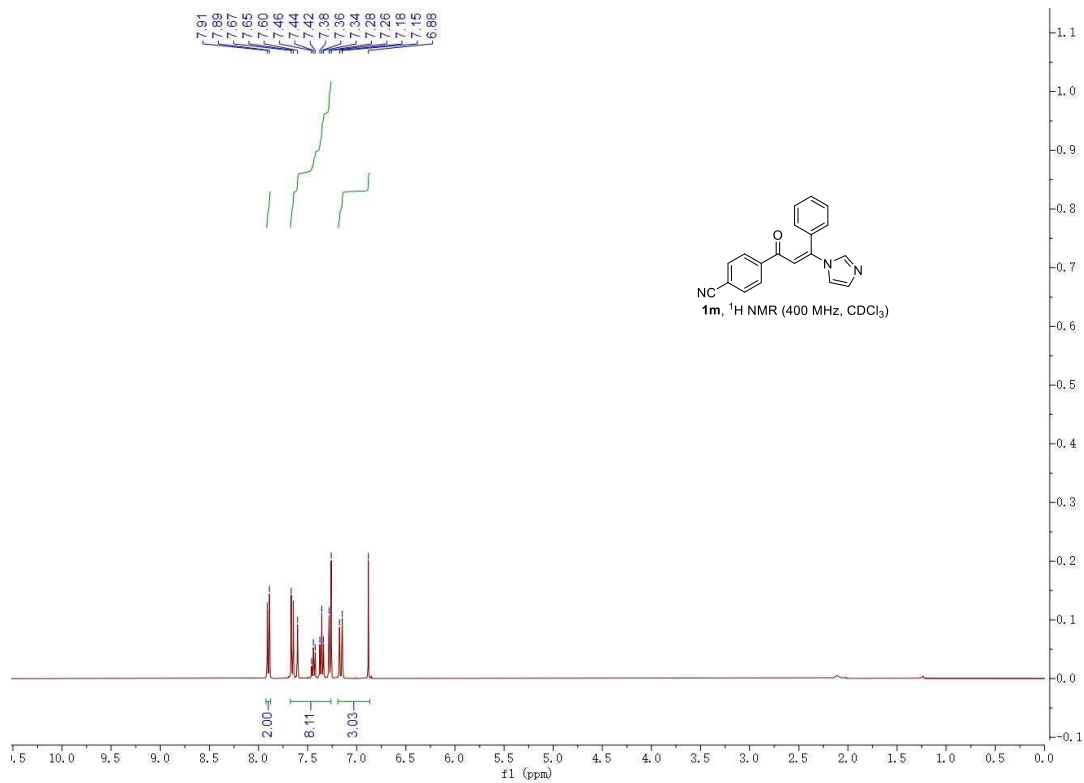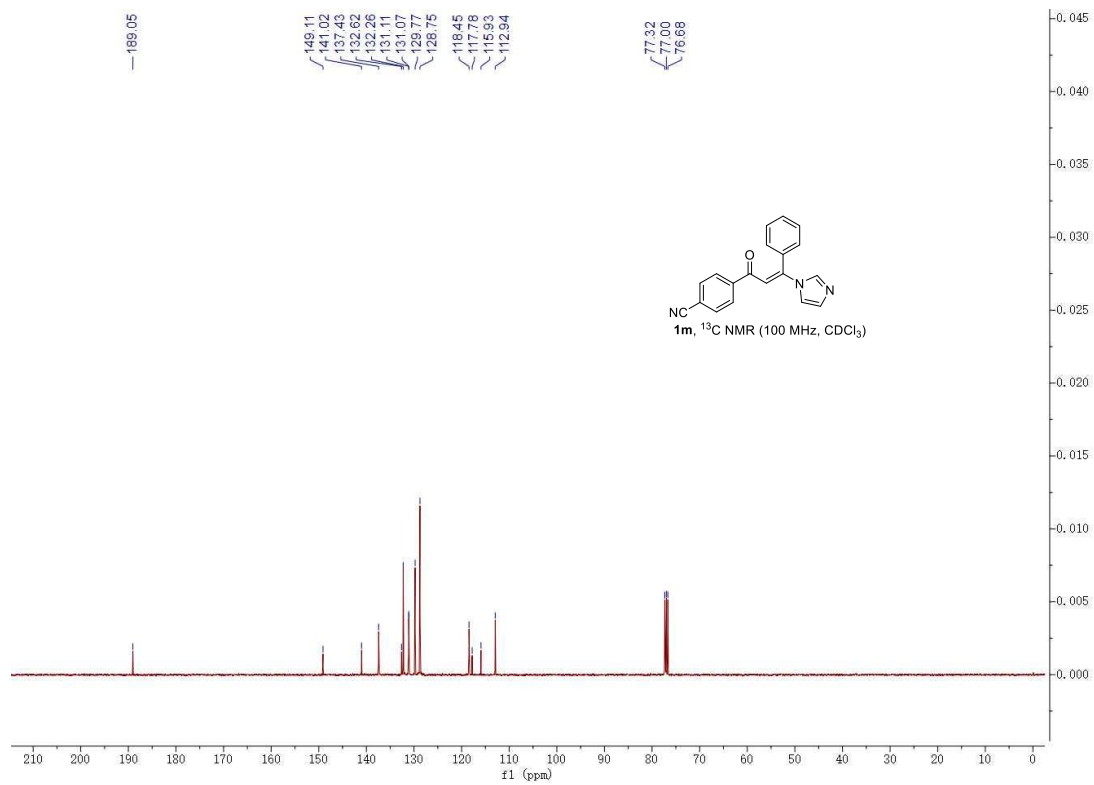

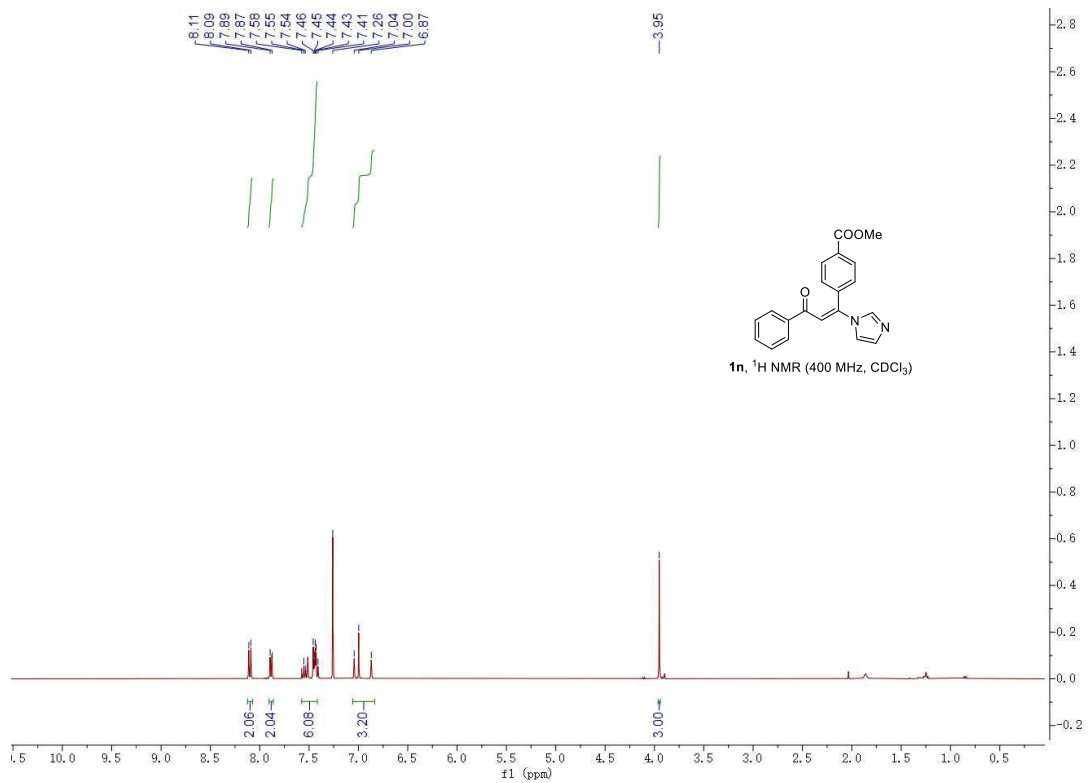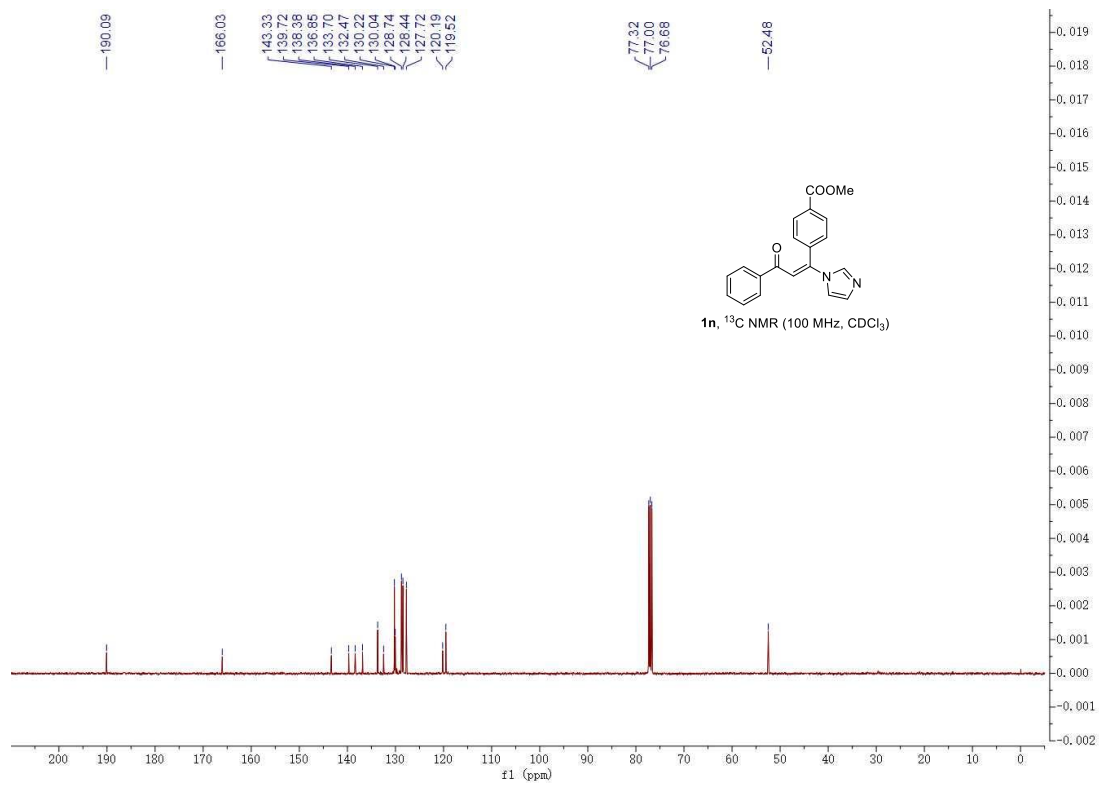

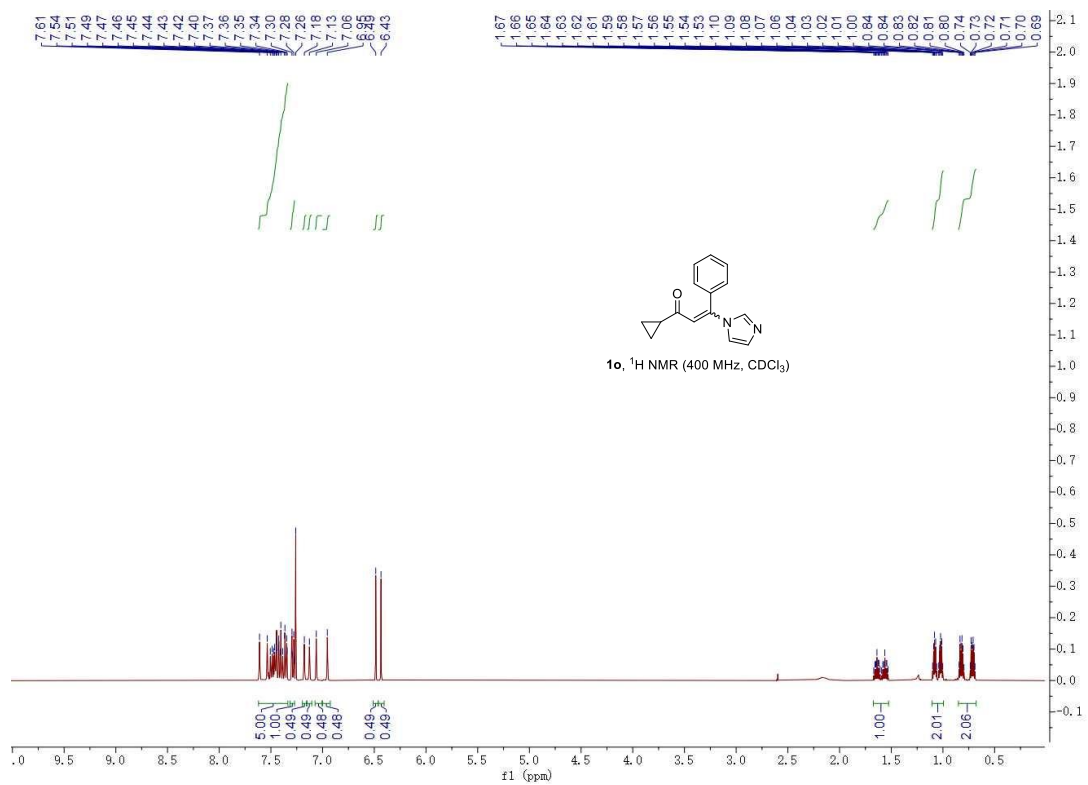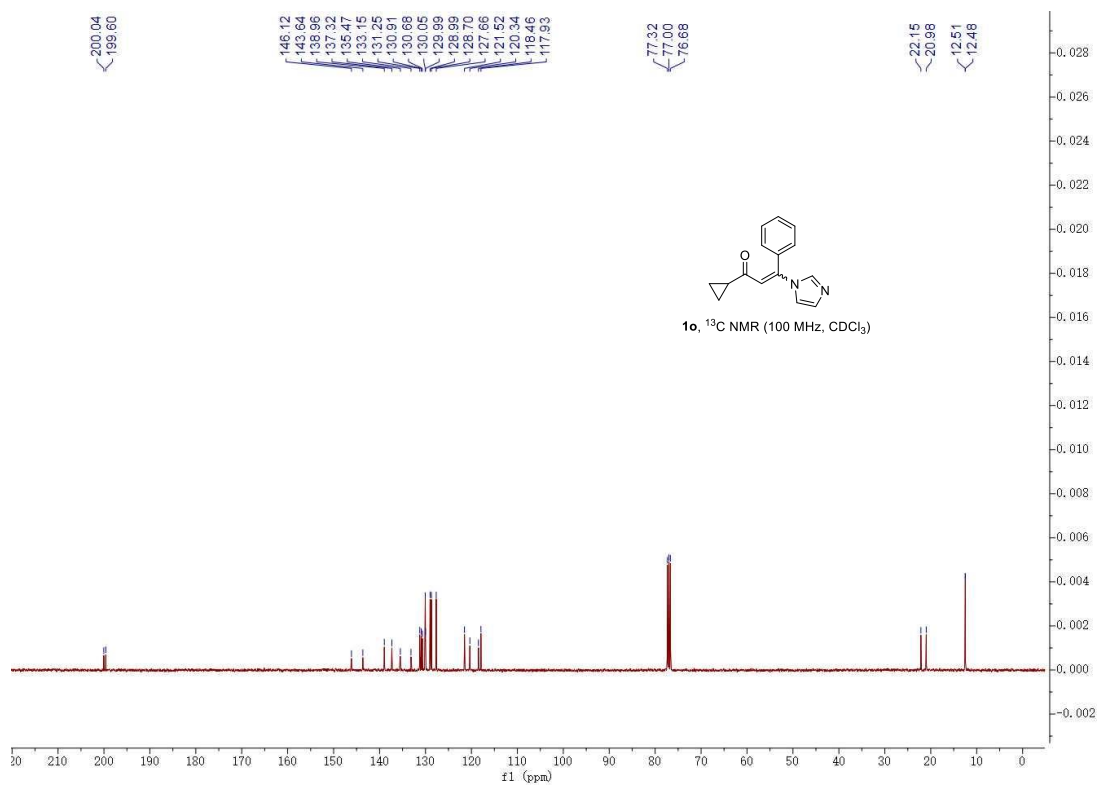

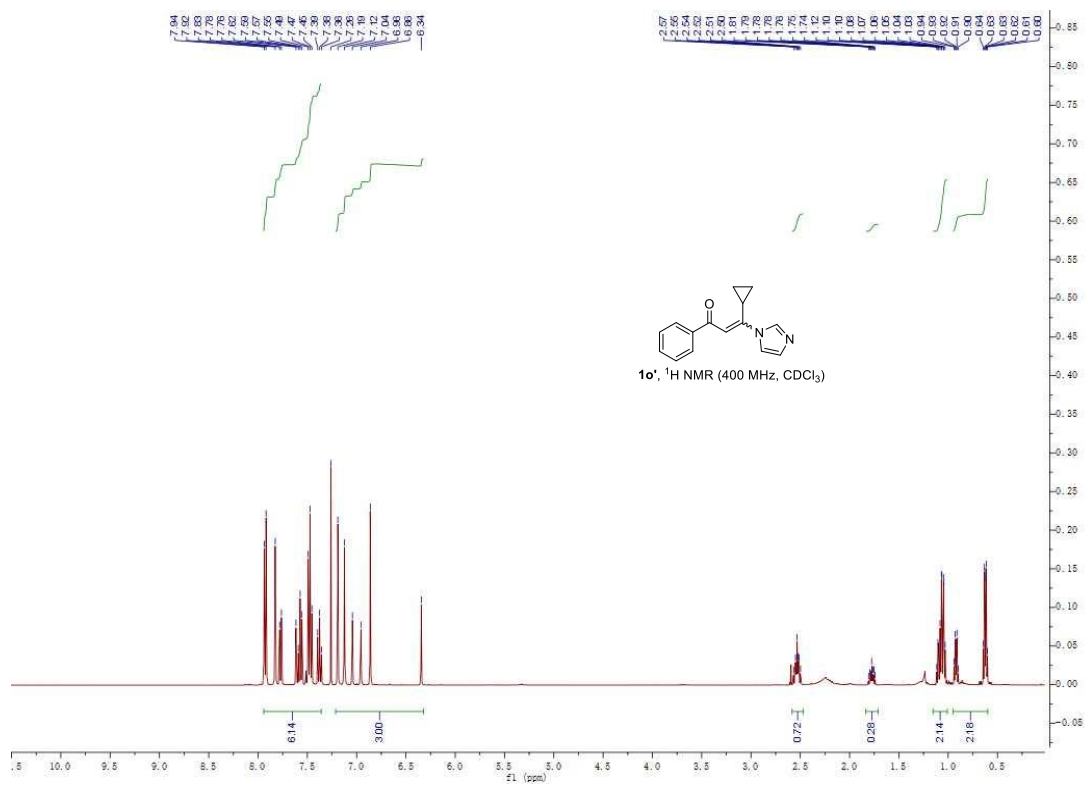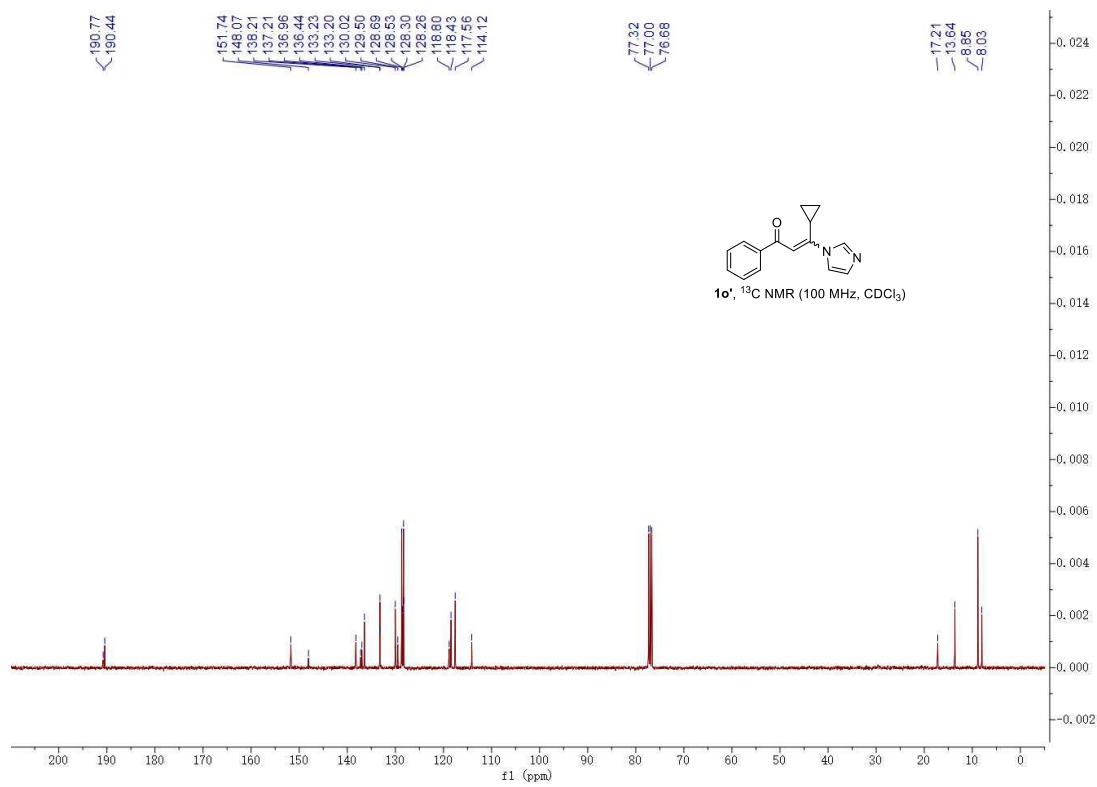

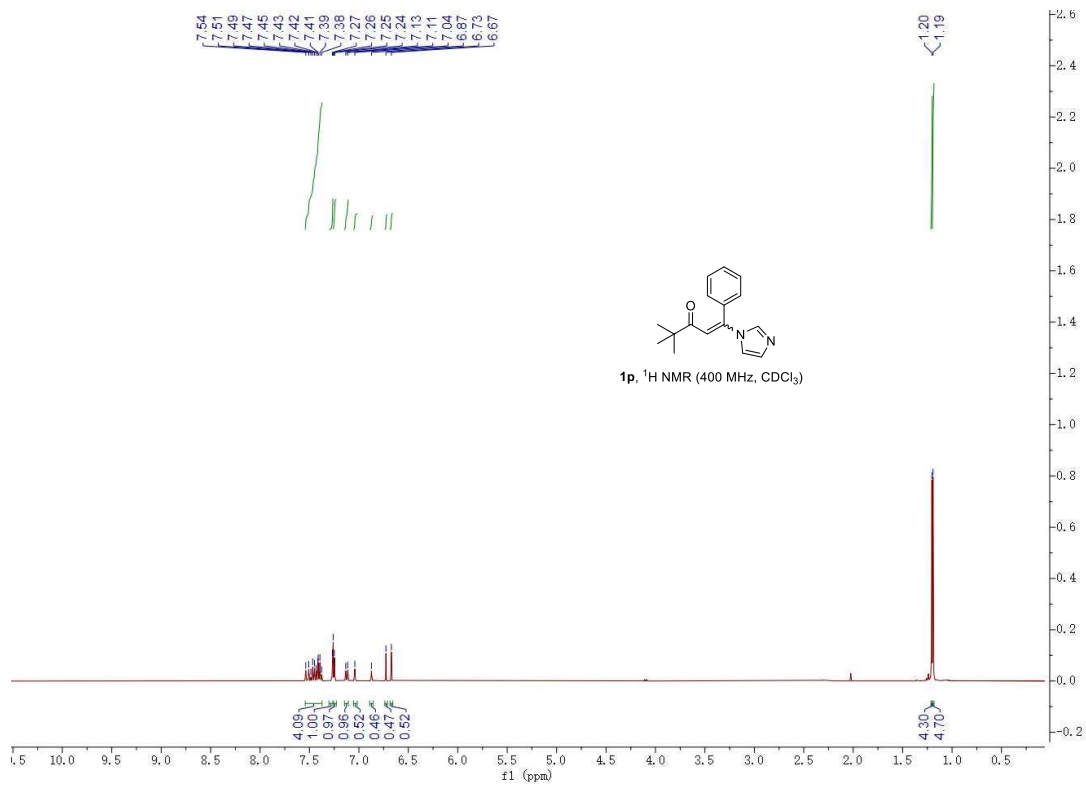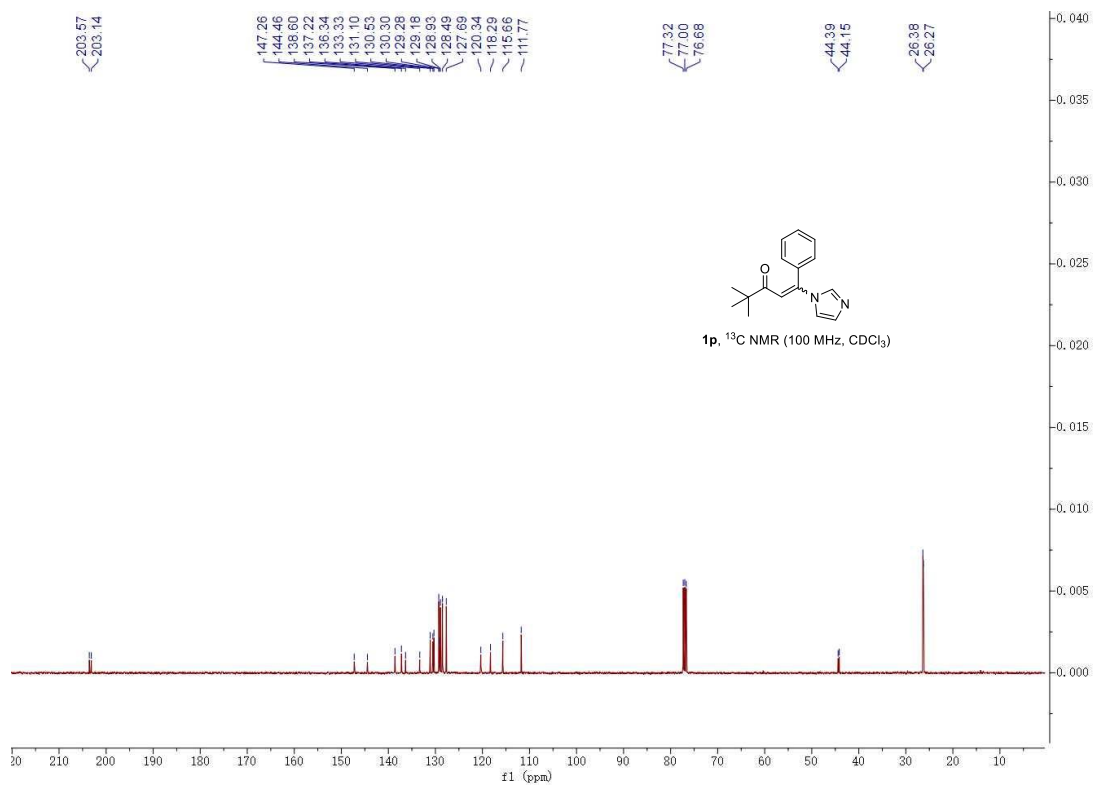



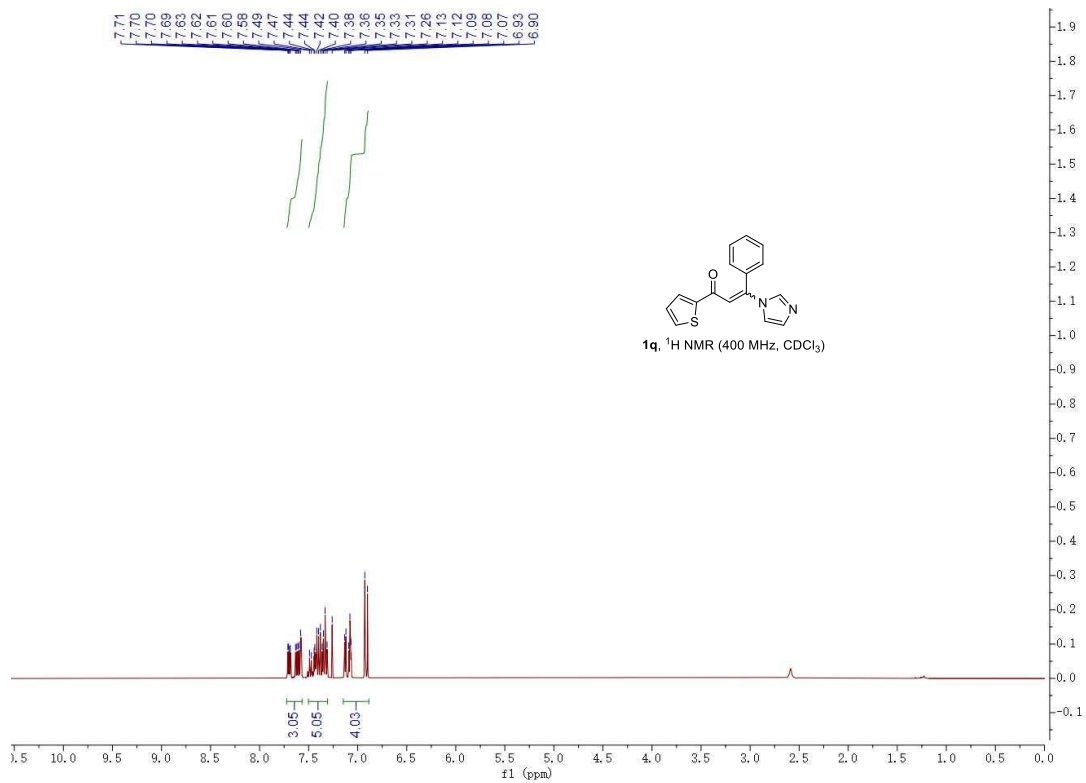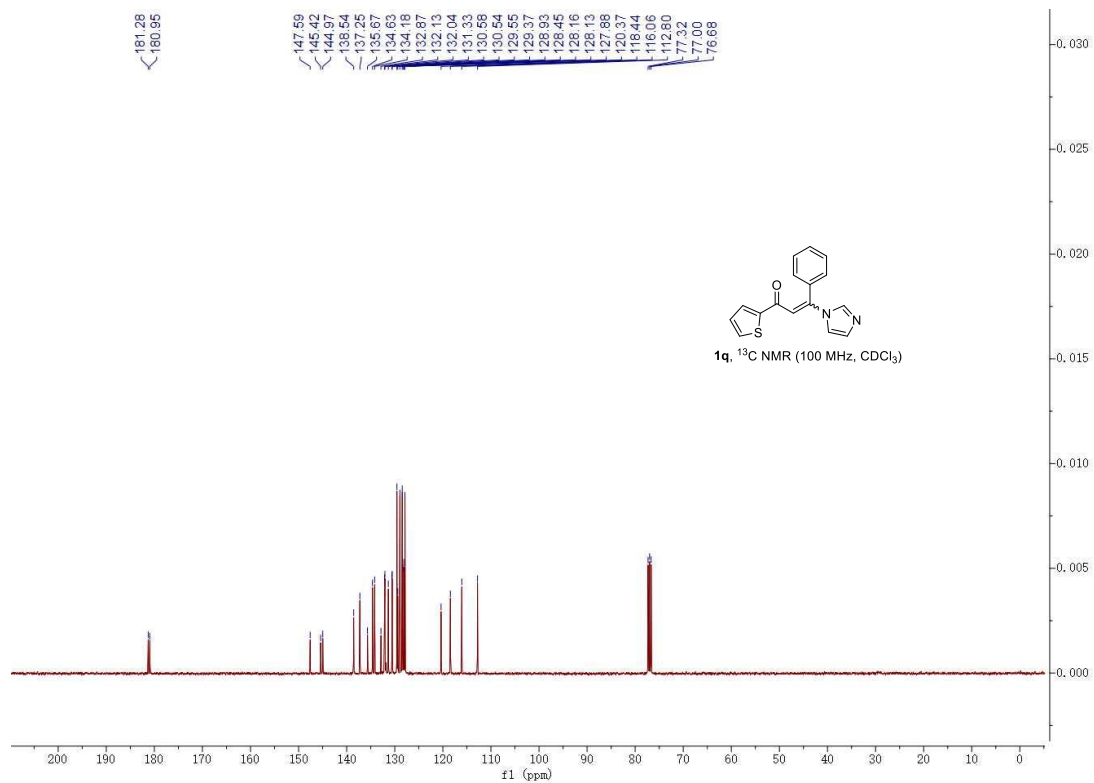

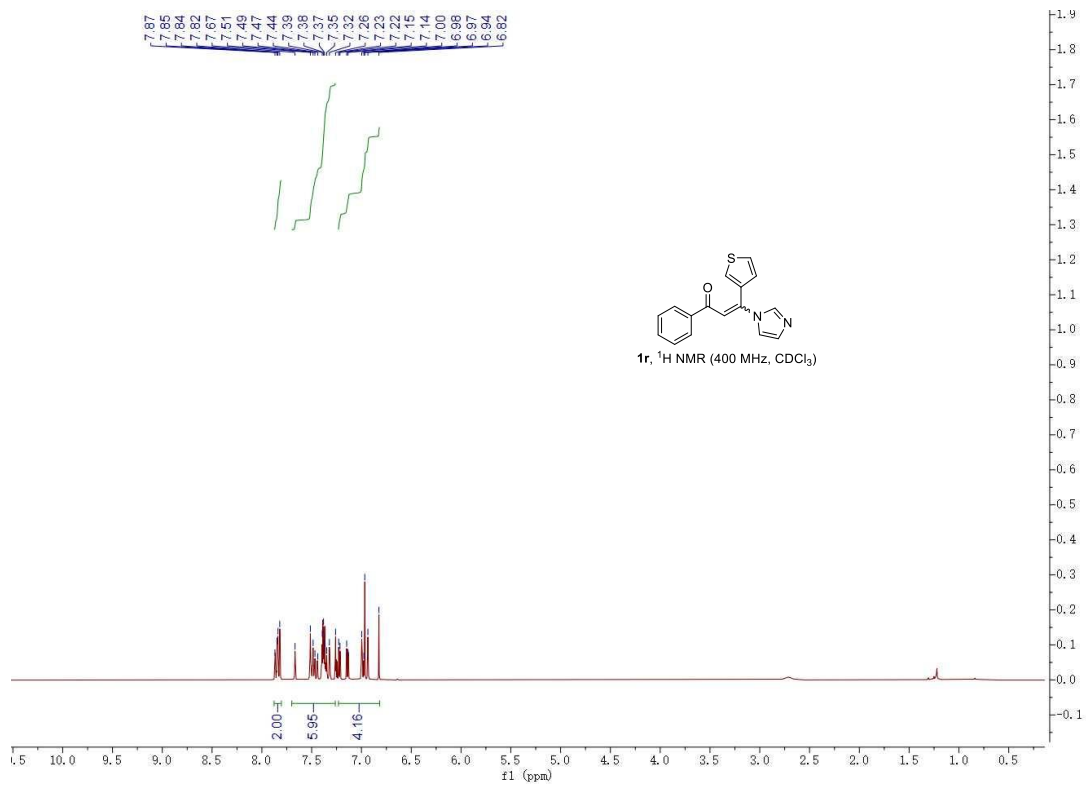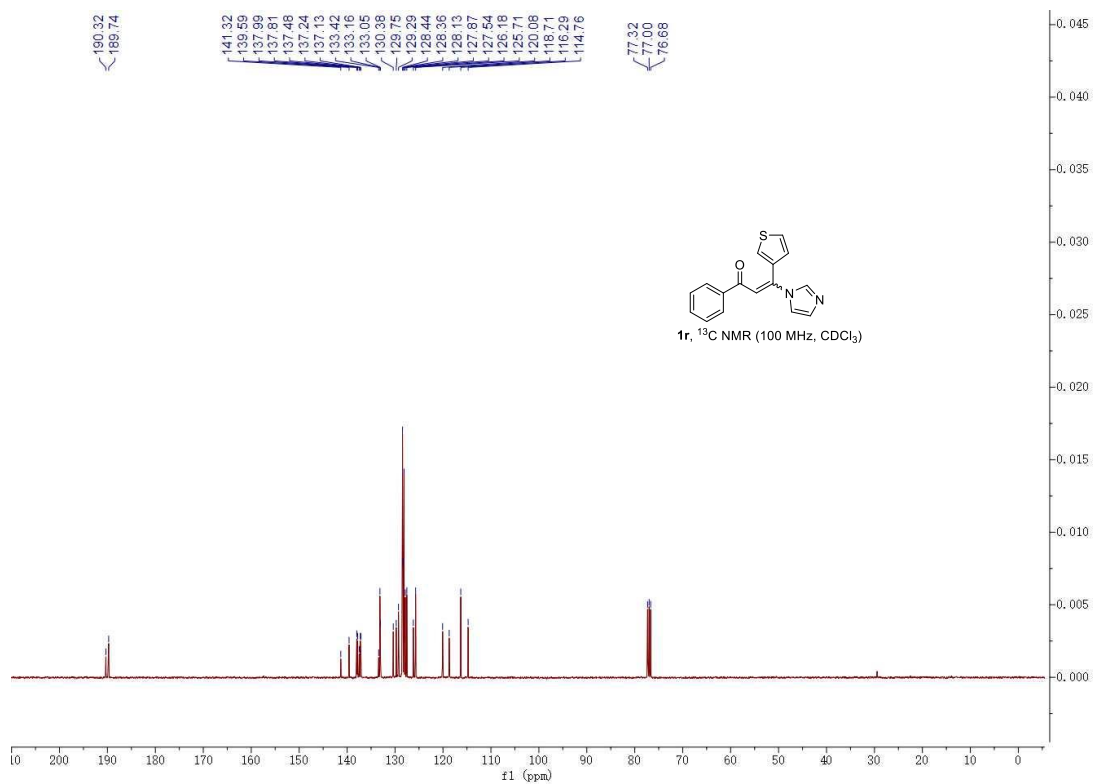

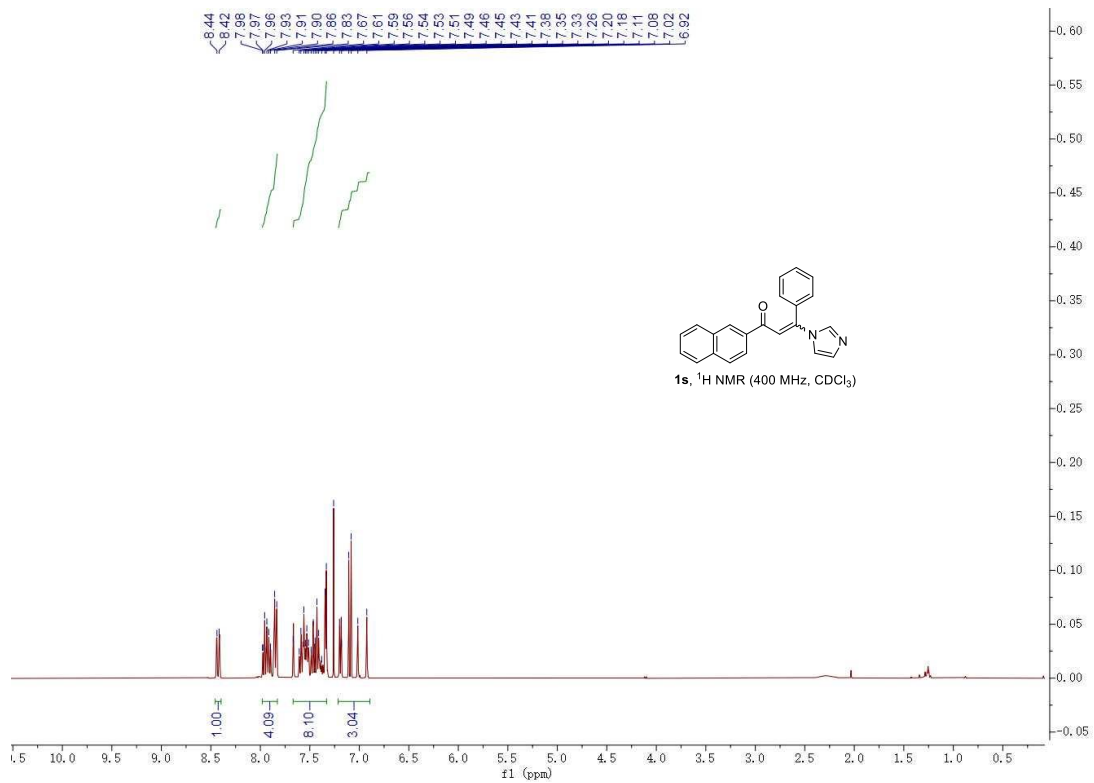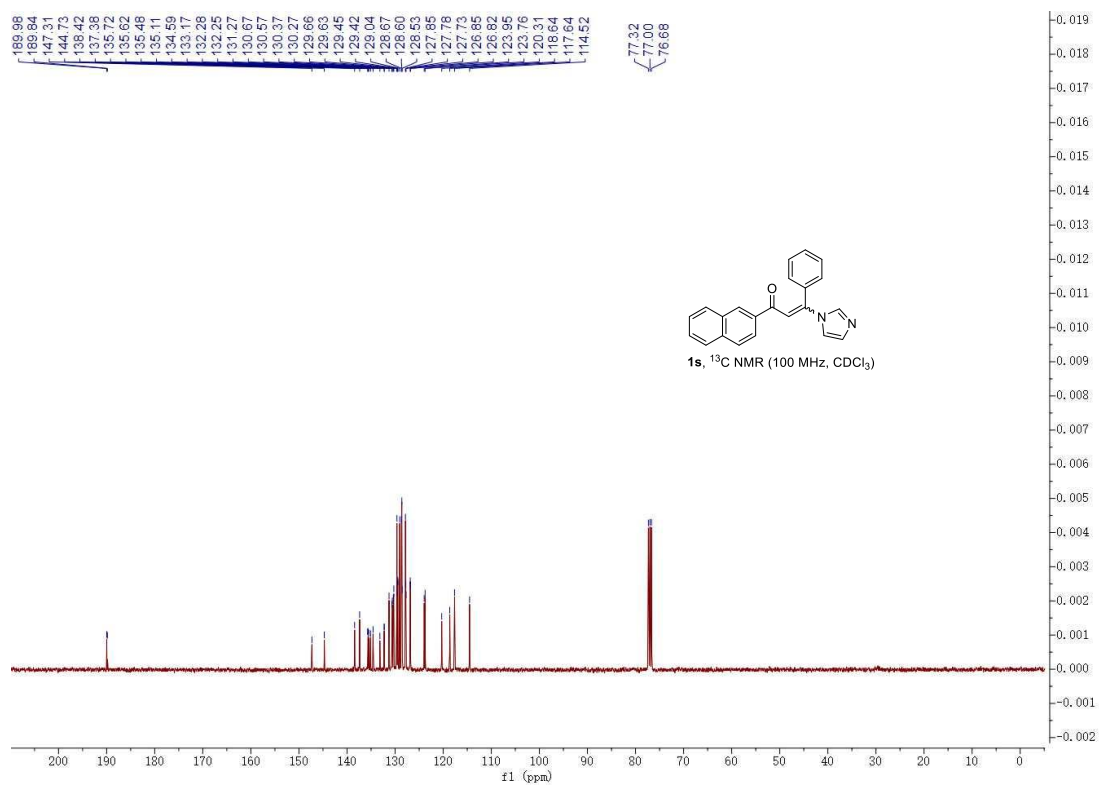

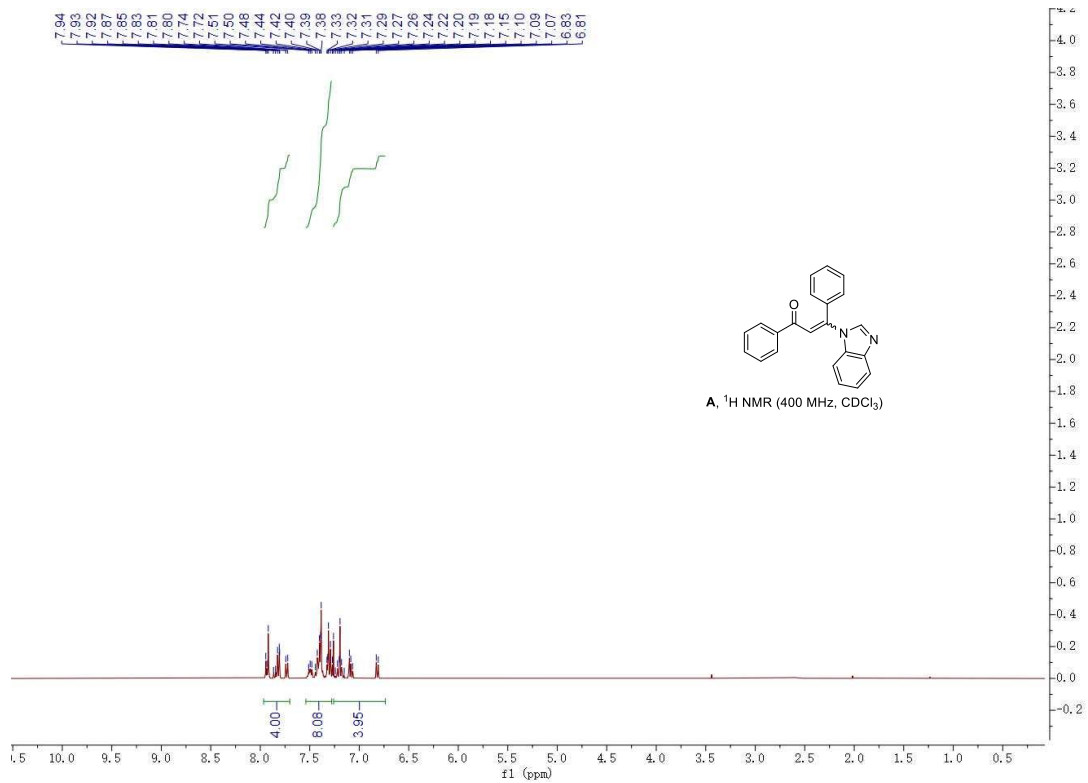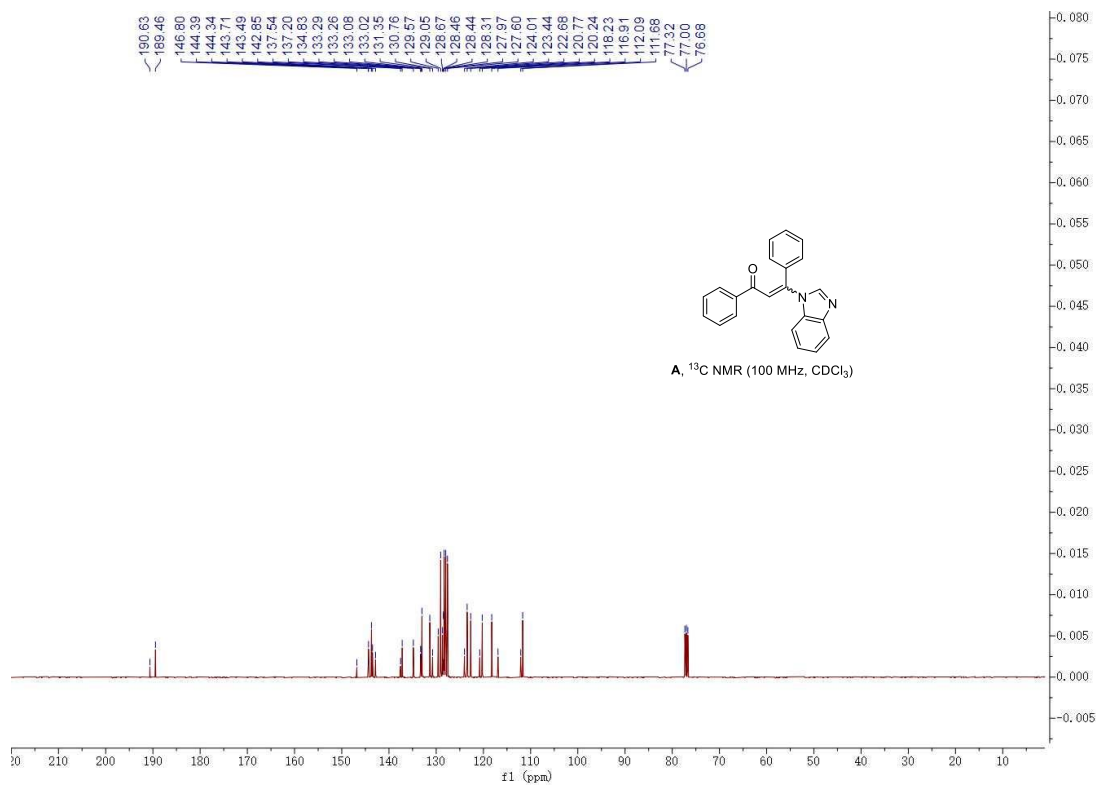

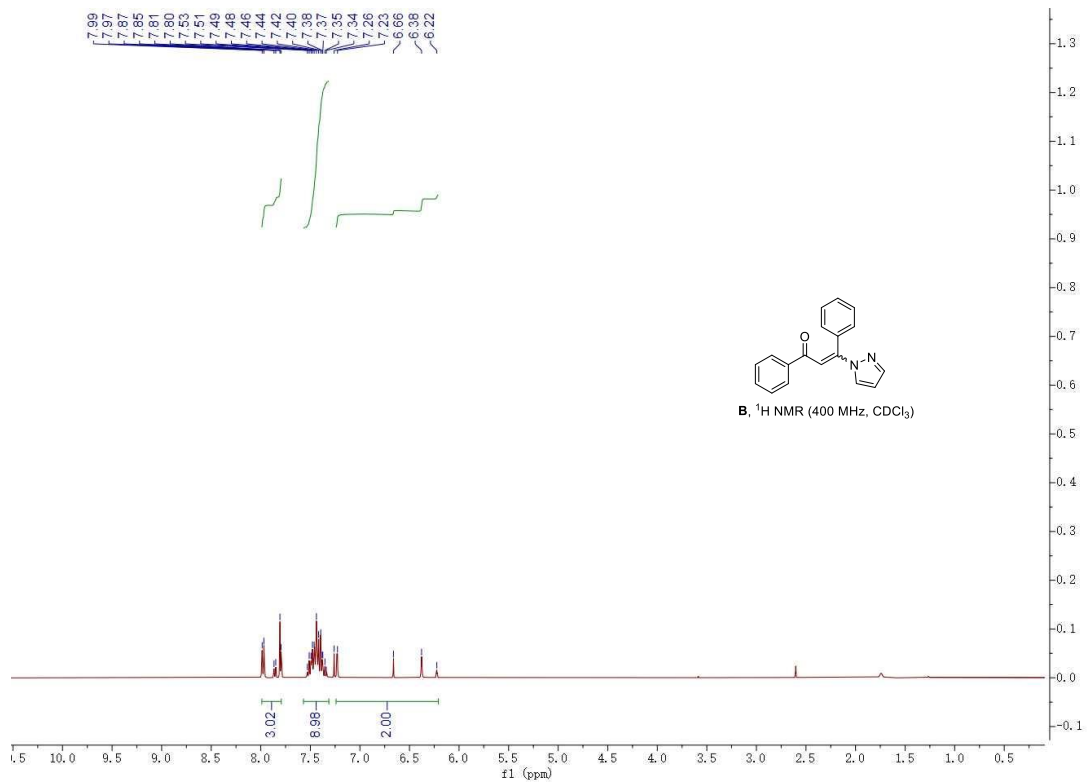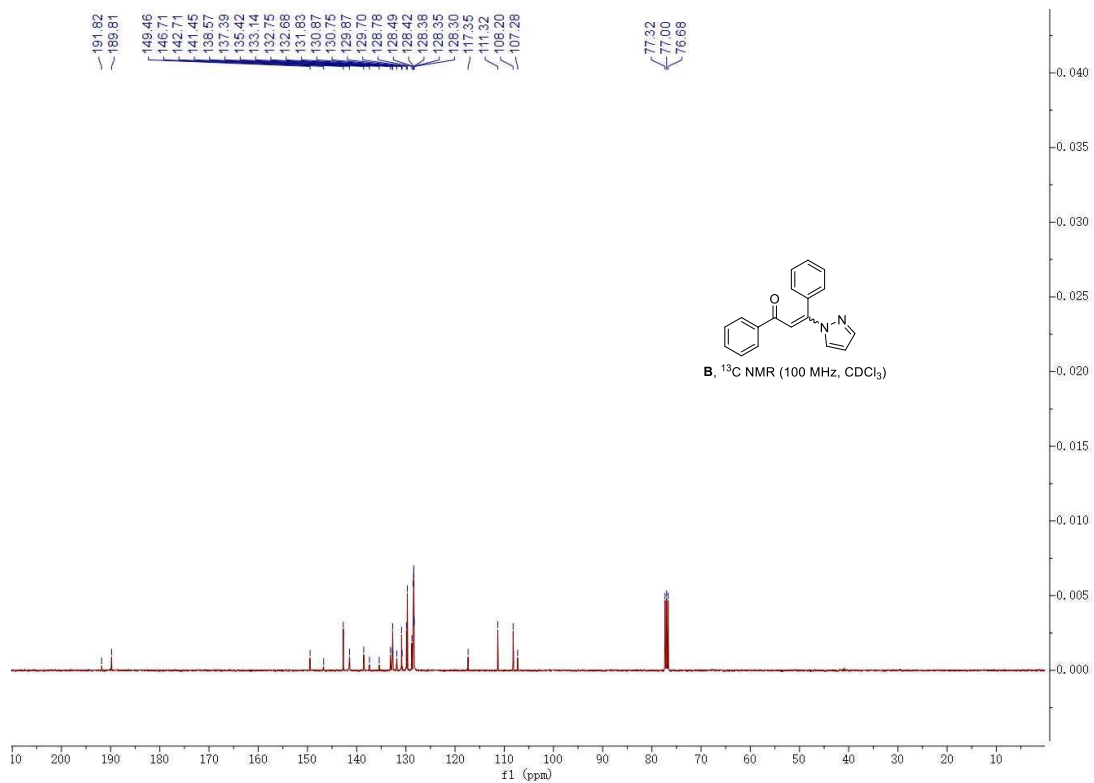

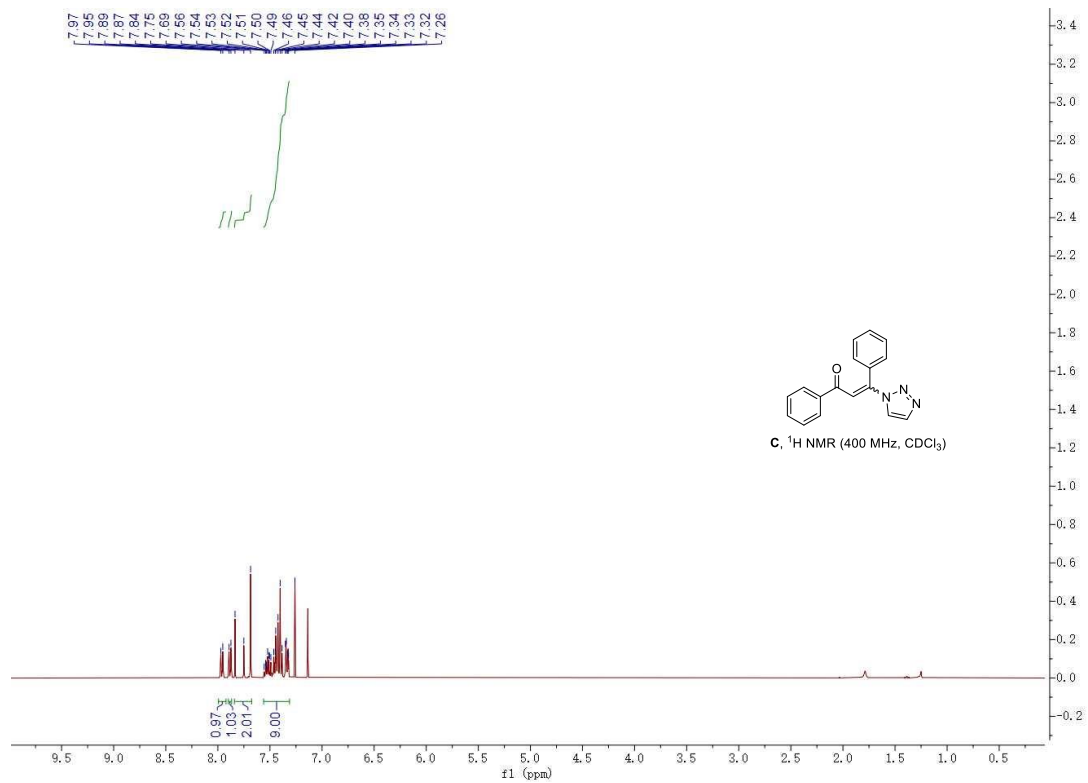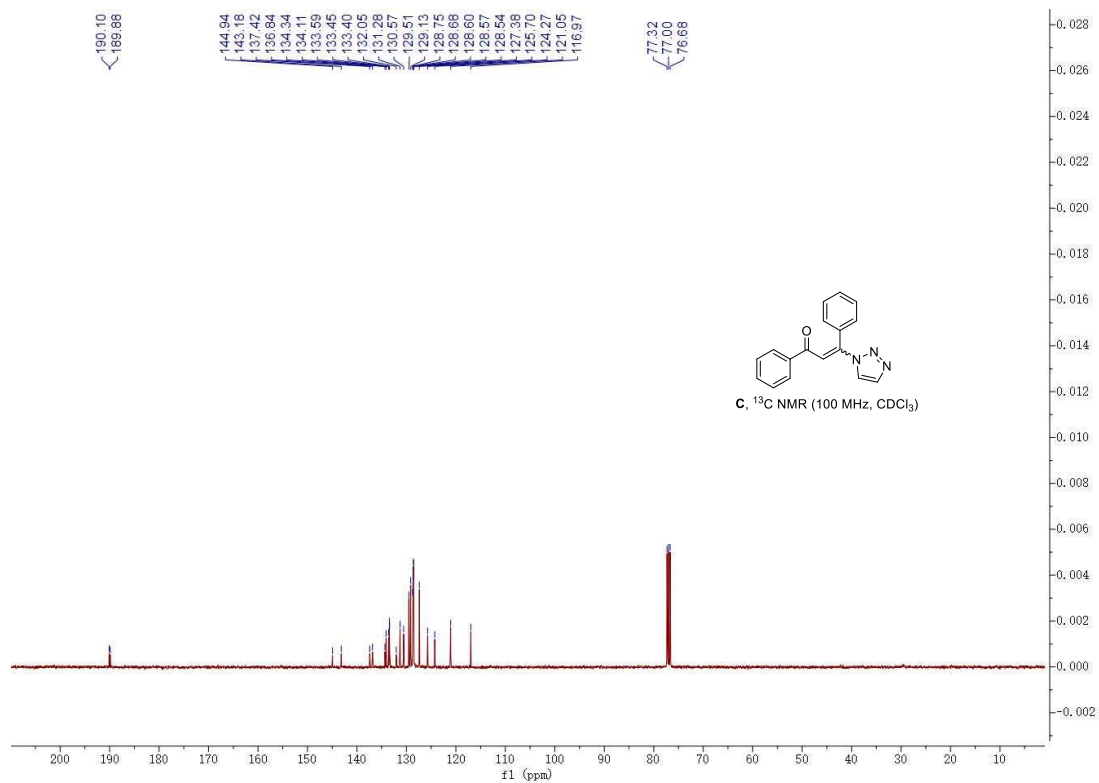

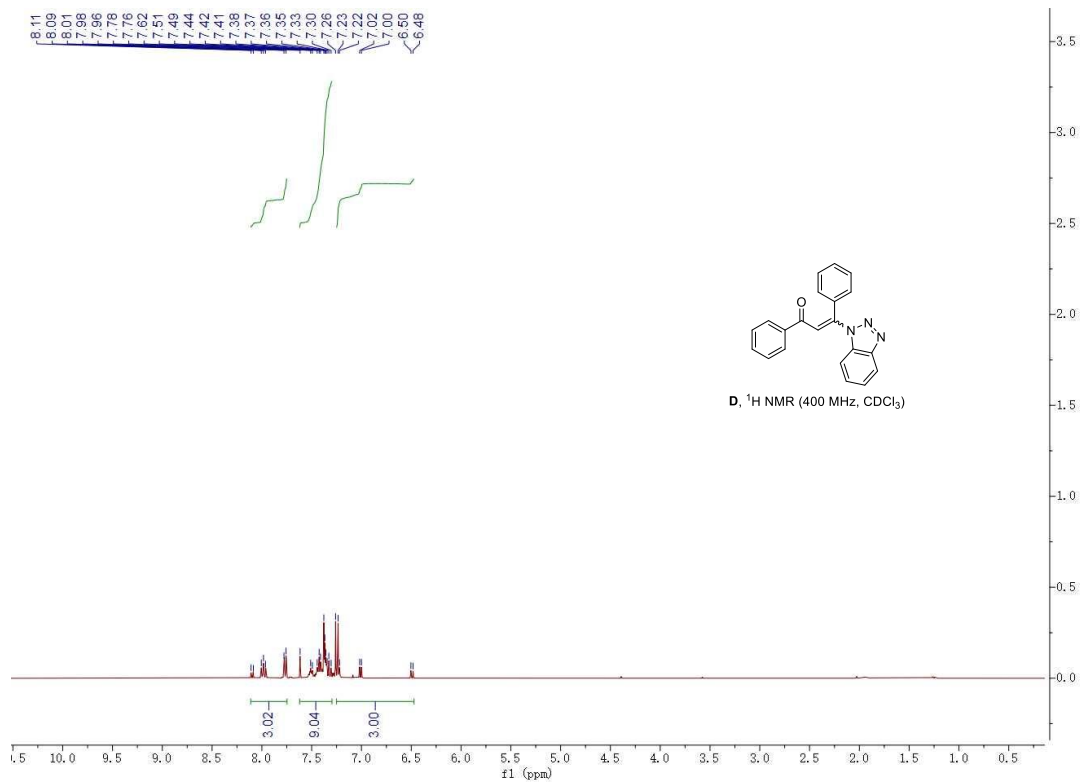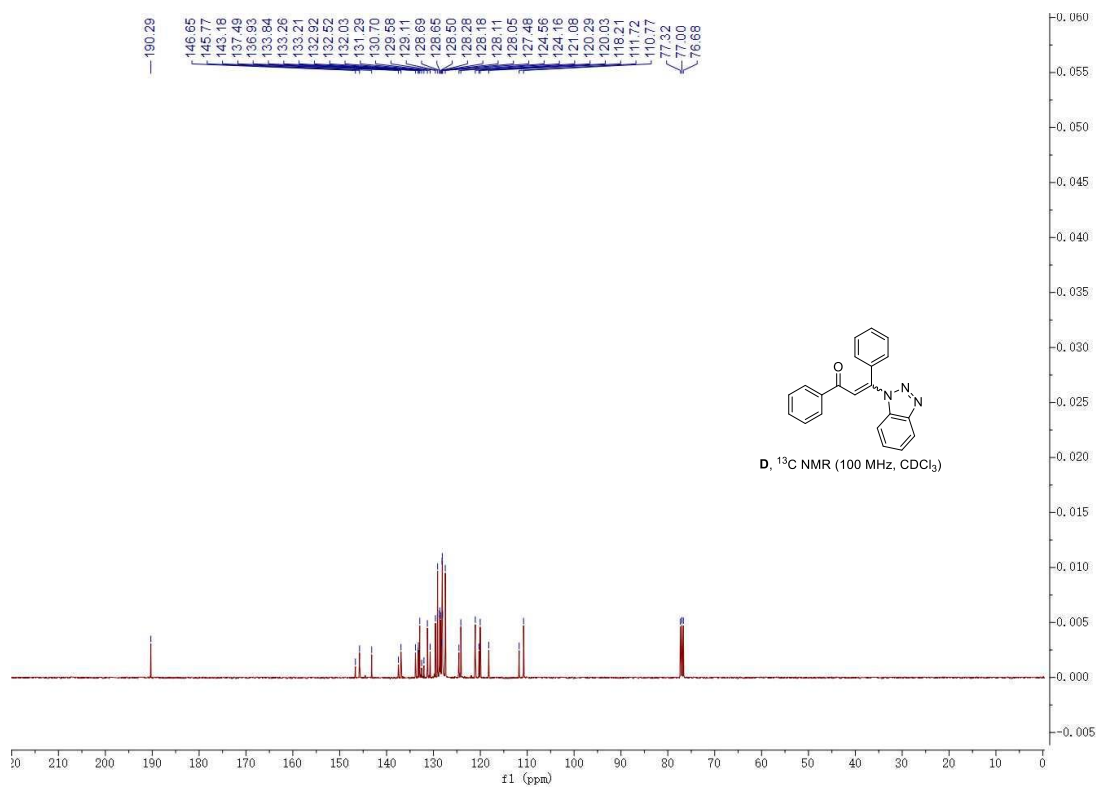

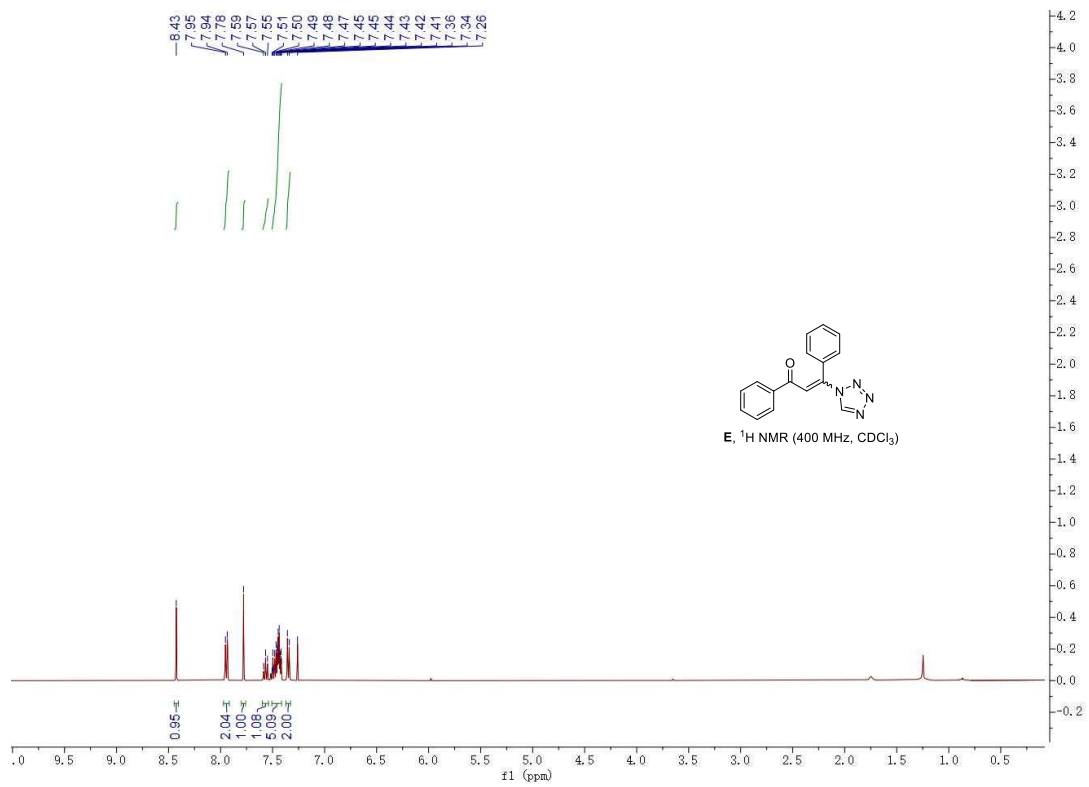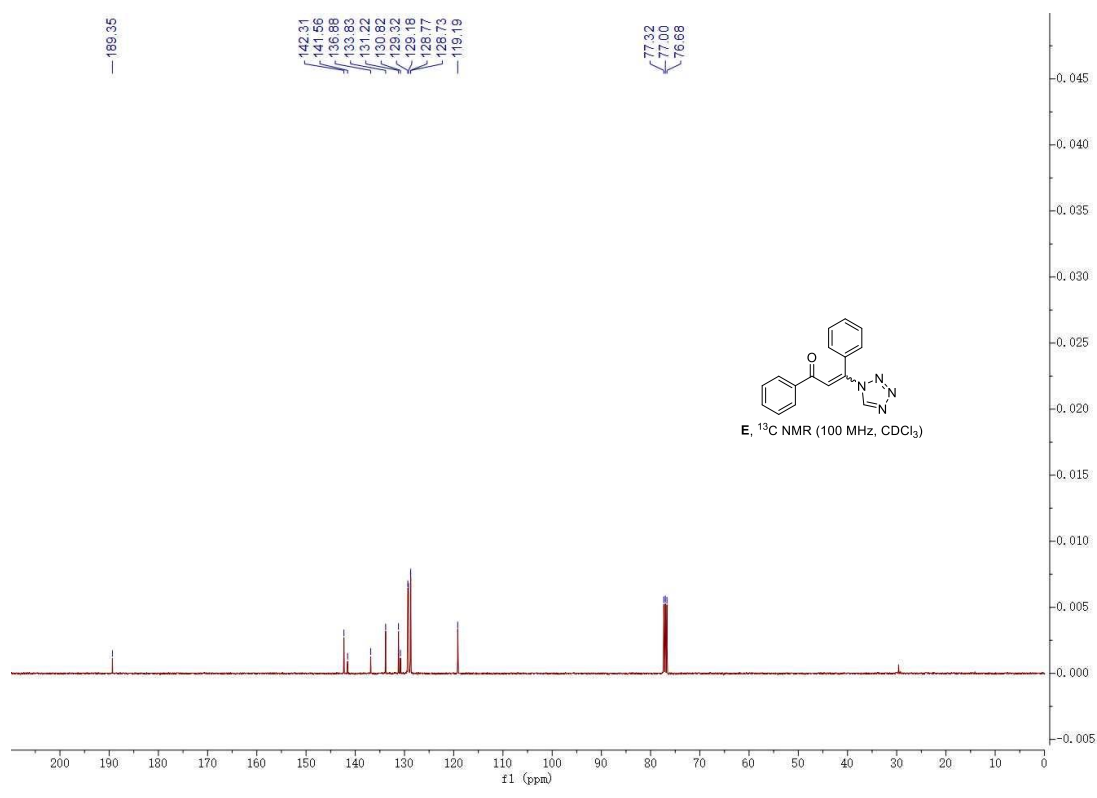



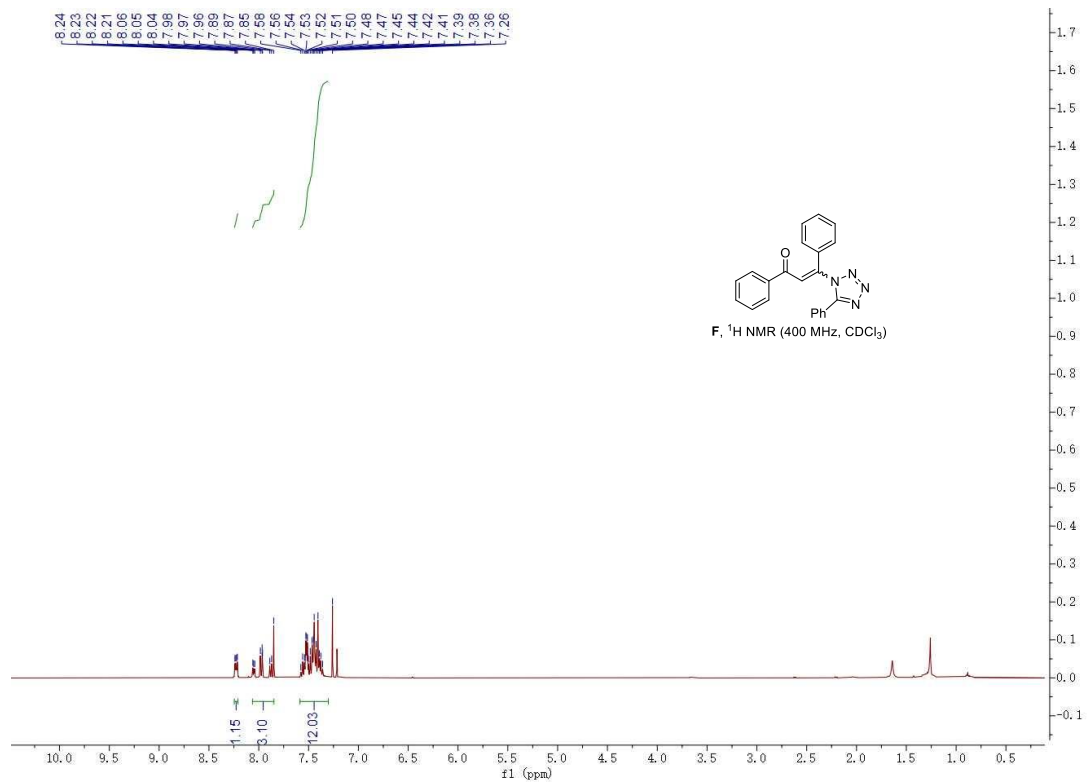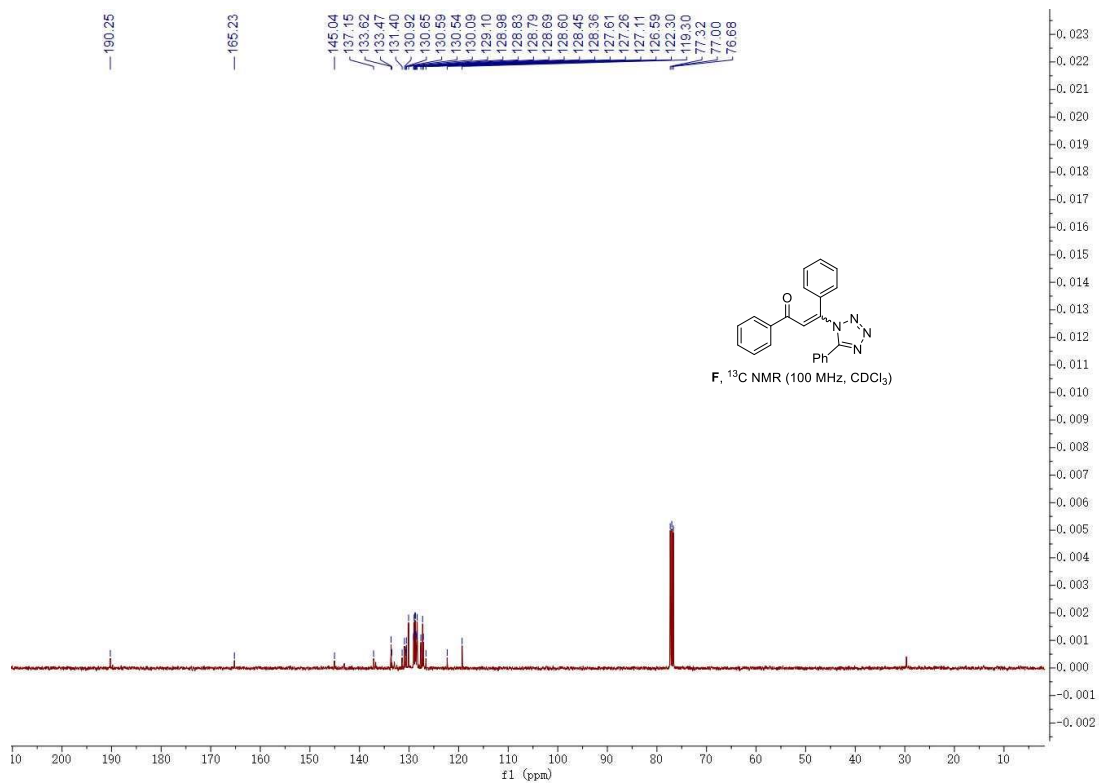

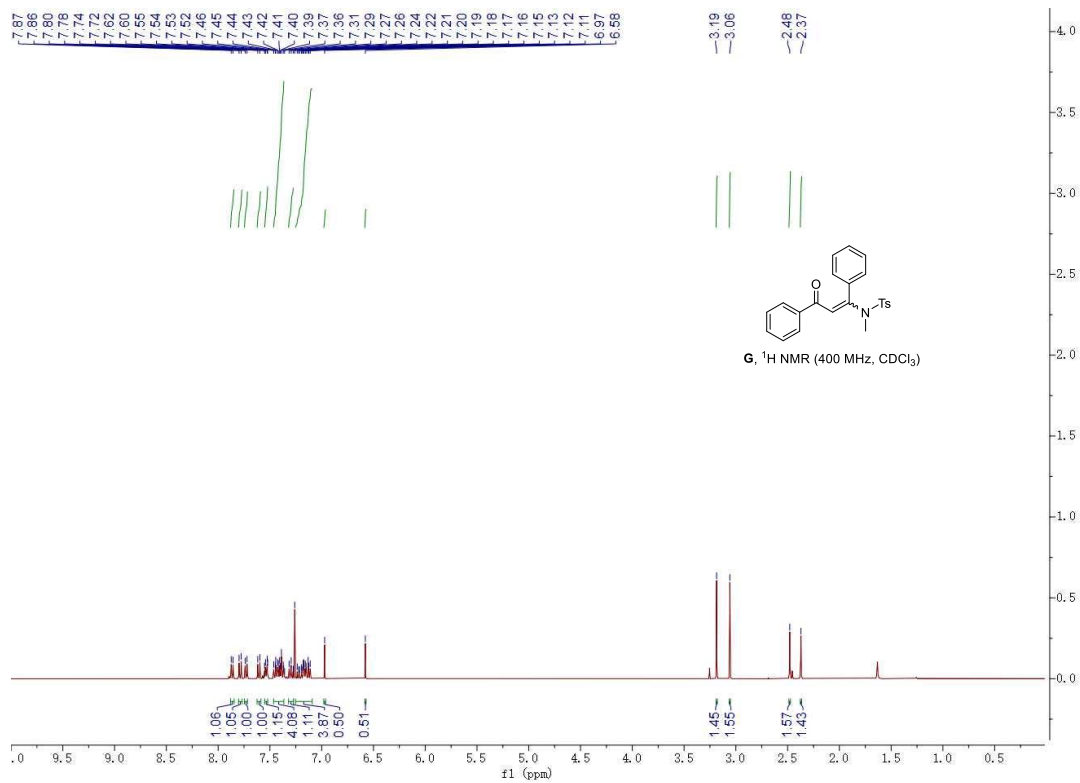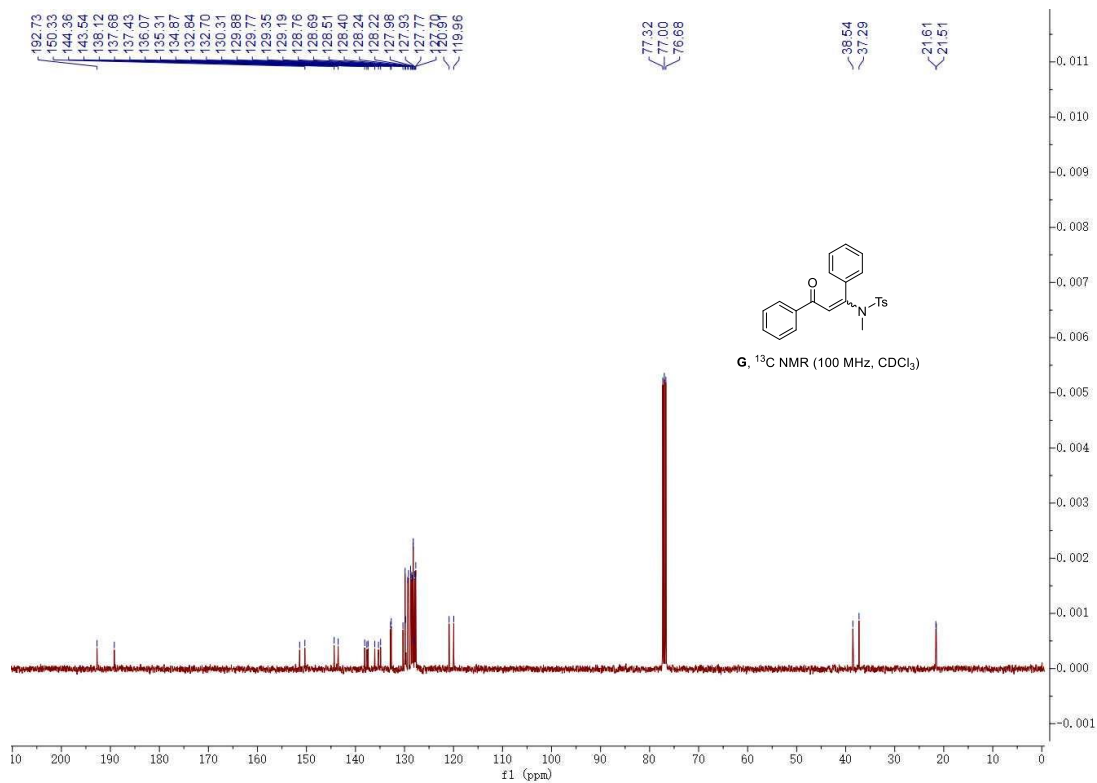

$^1\text{H}$  NMR and  $^{13}\text{C}$  NMR spectra of compounds **3a–3u** & **3ab–3ed**.

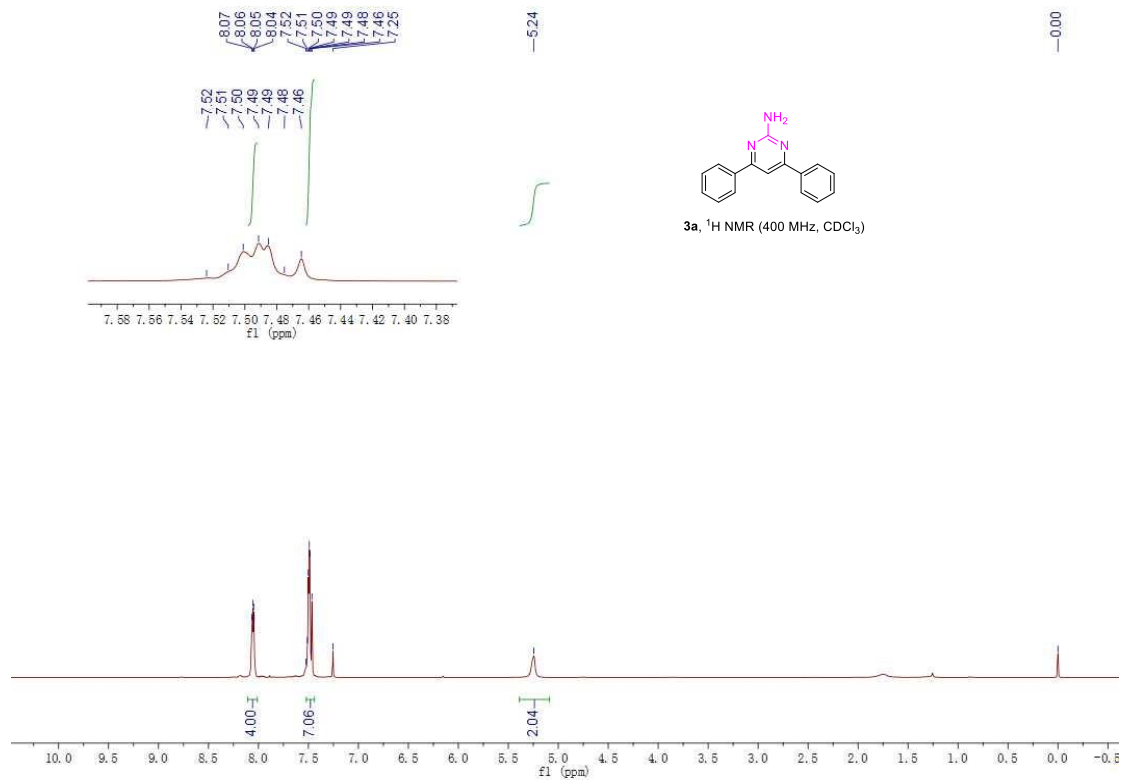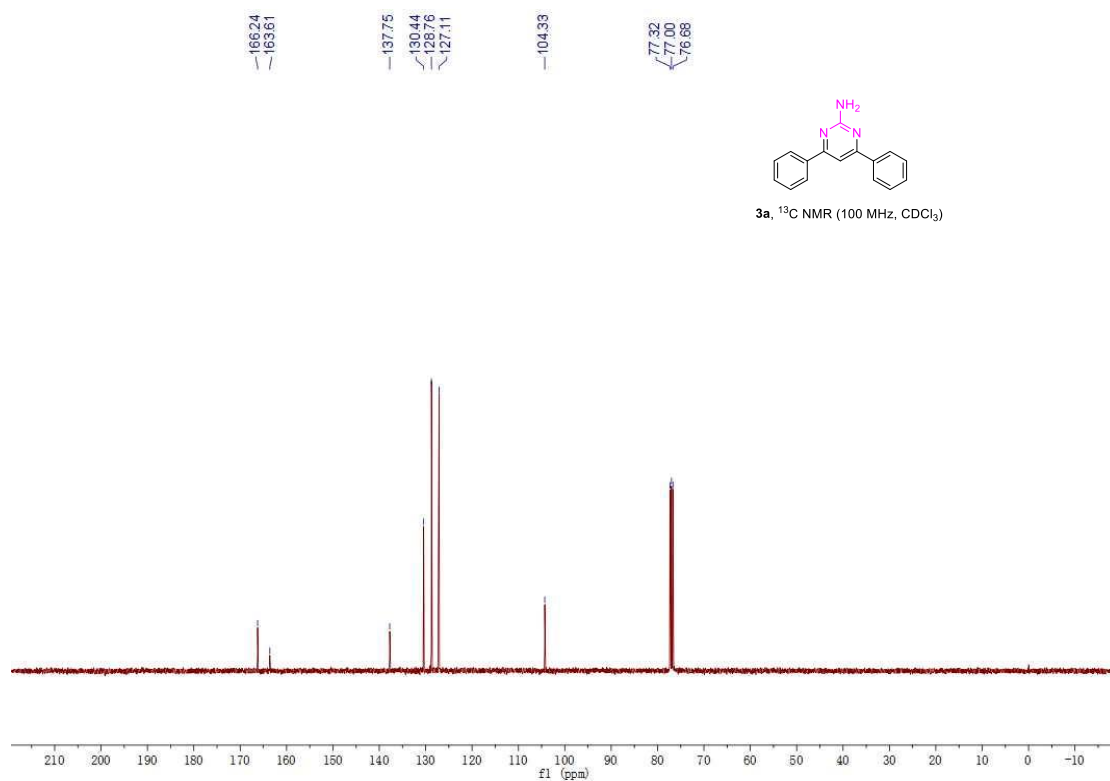

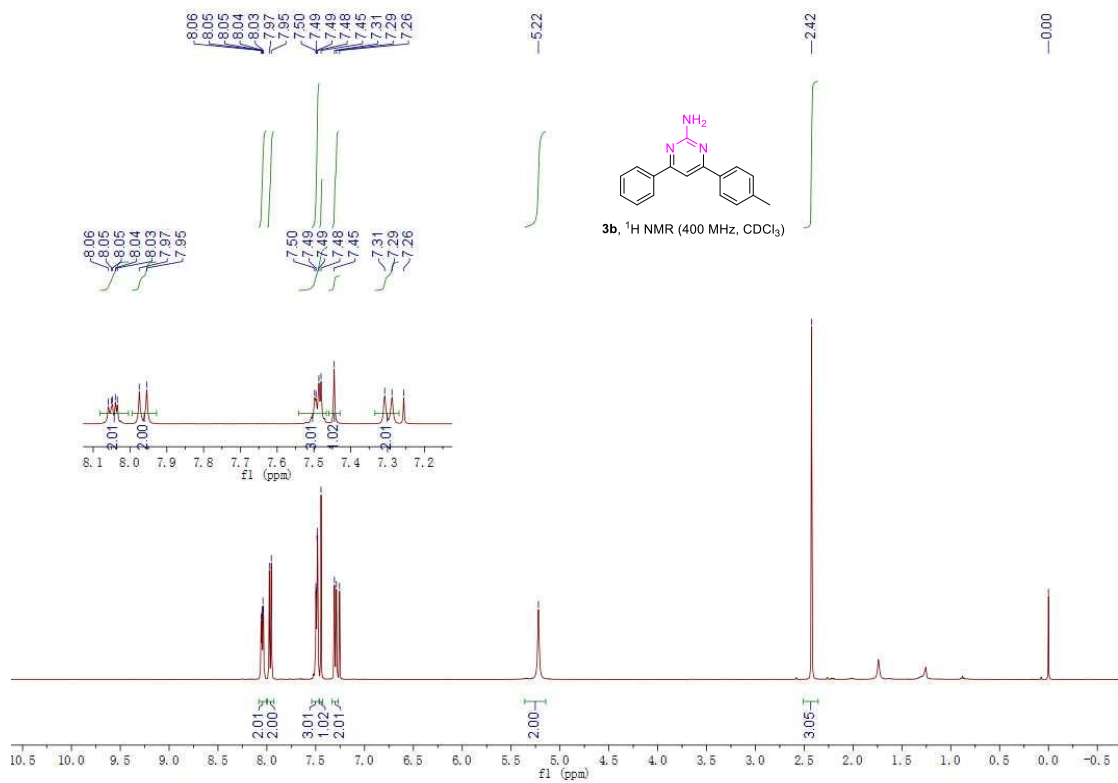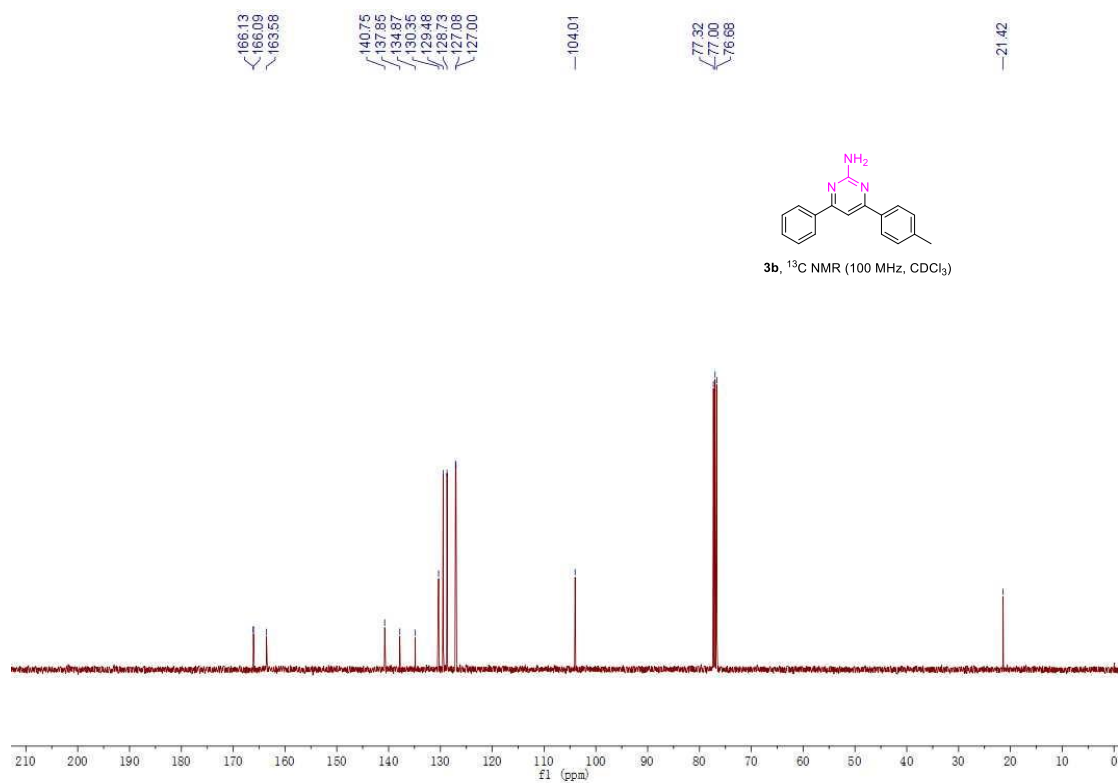

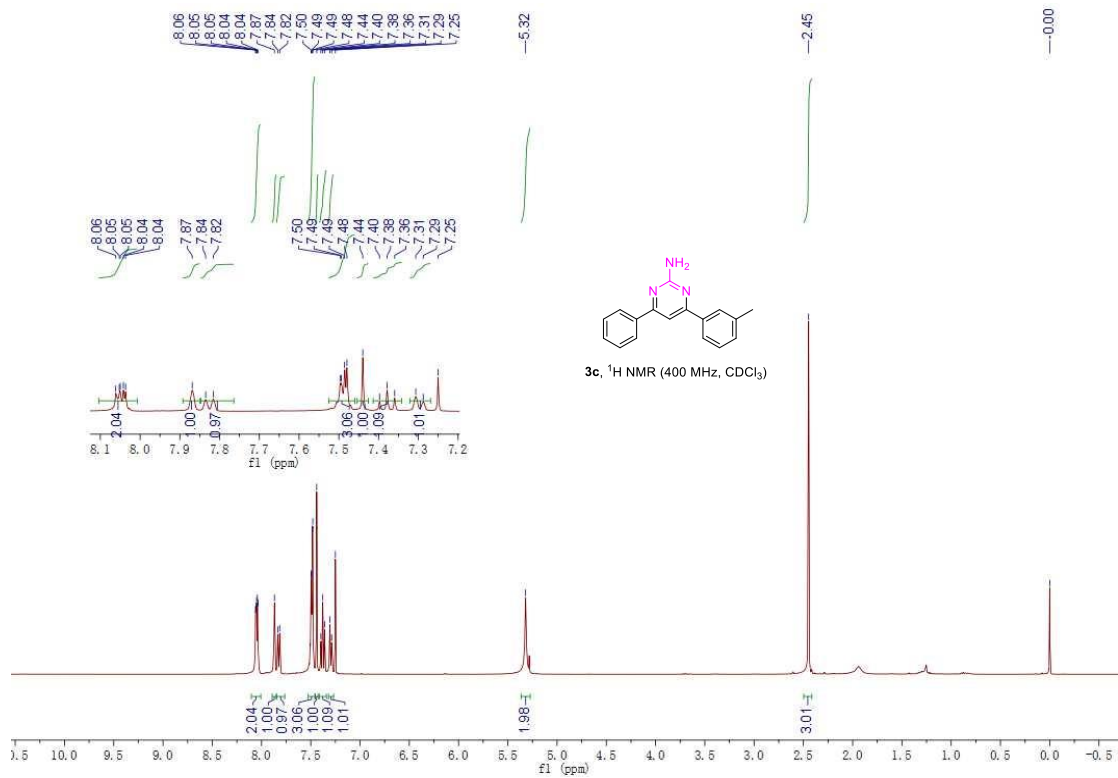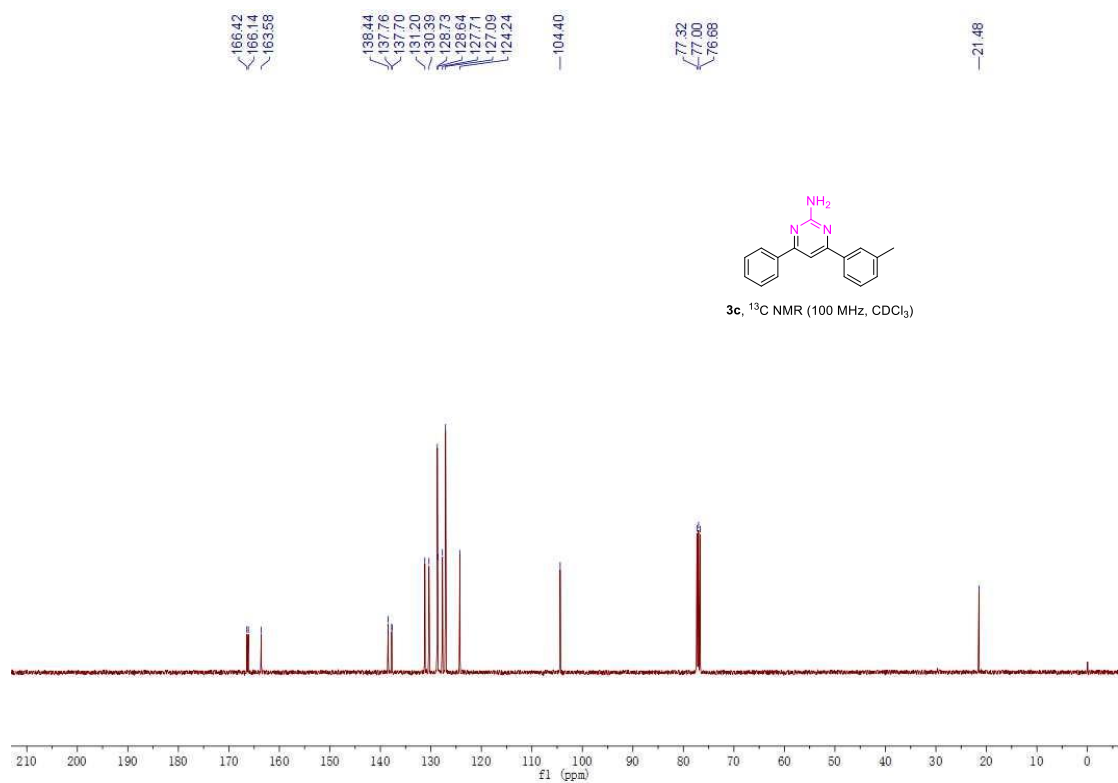

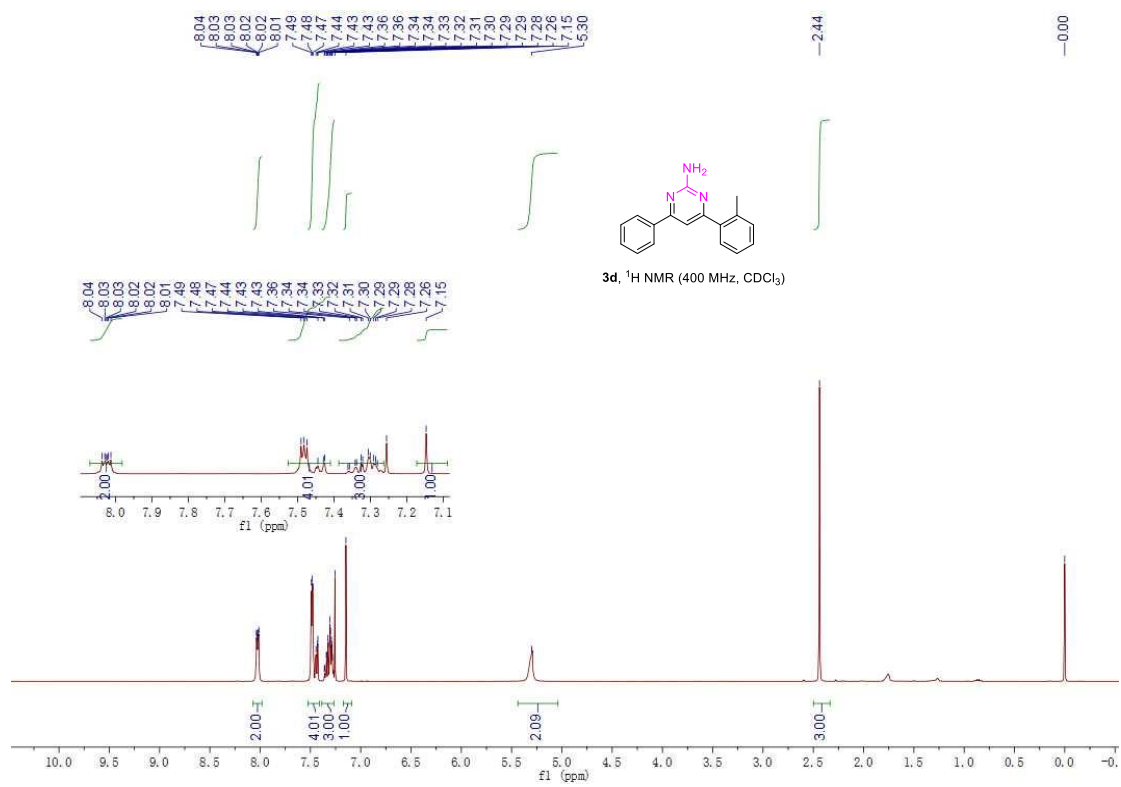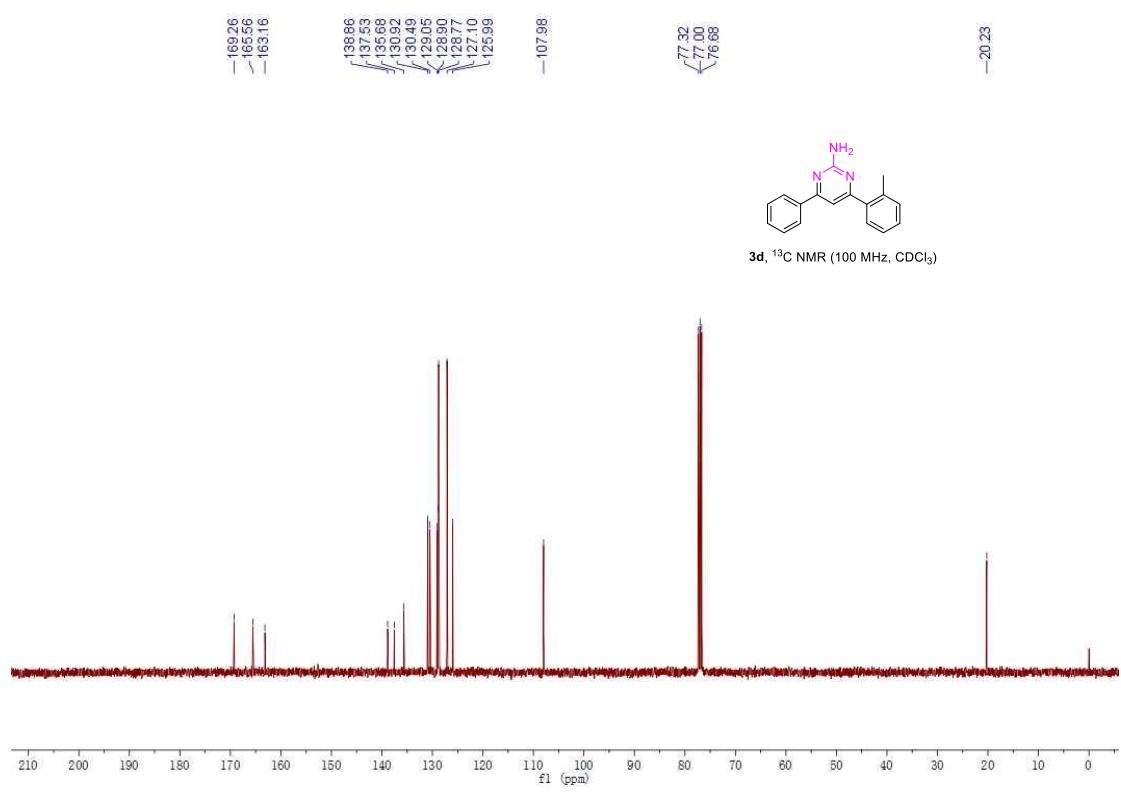

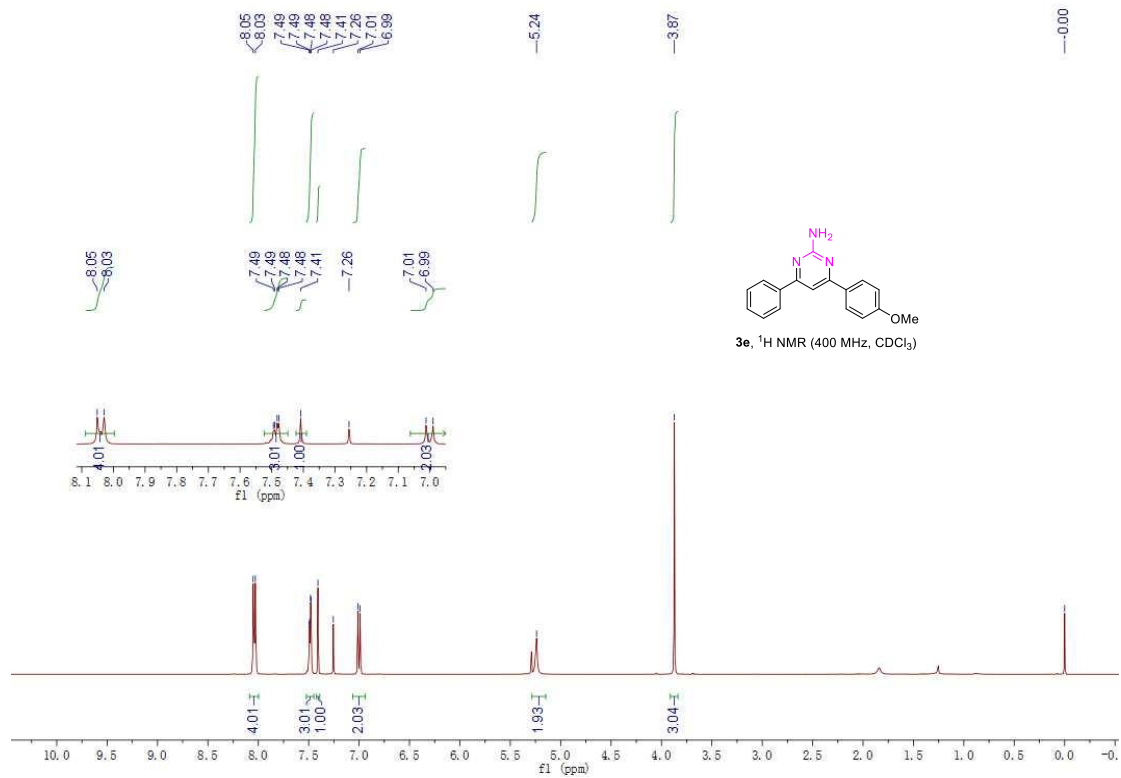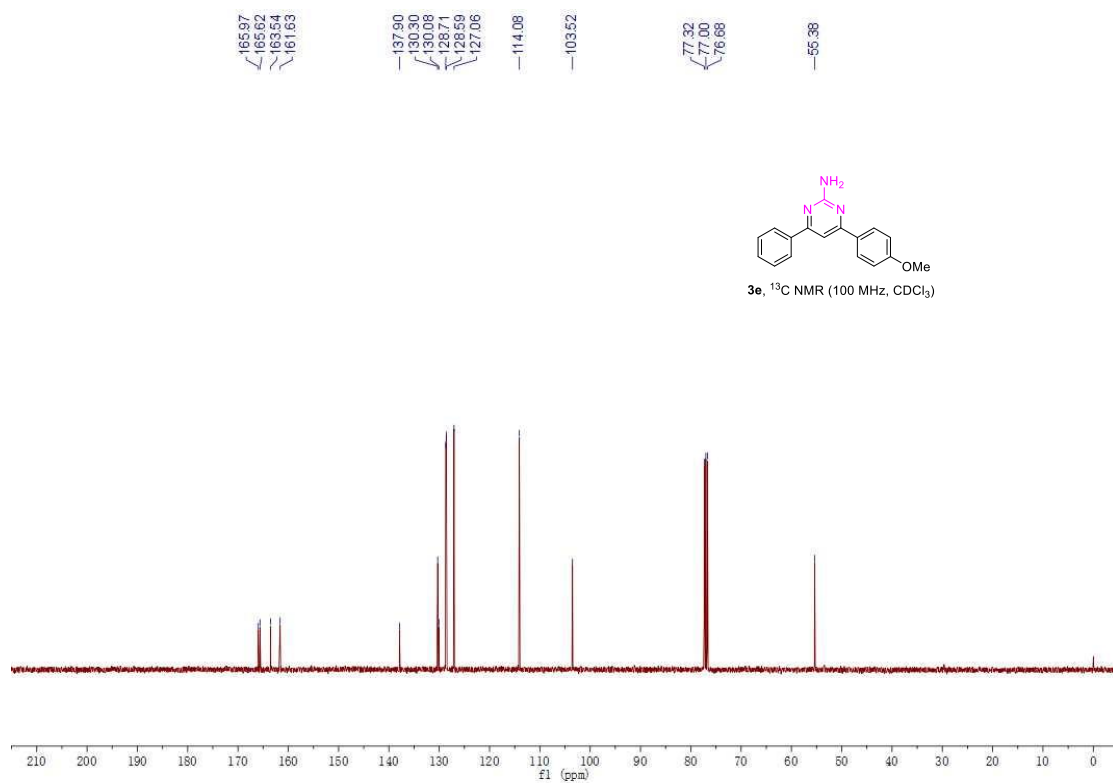

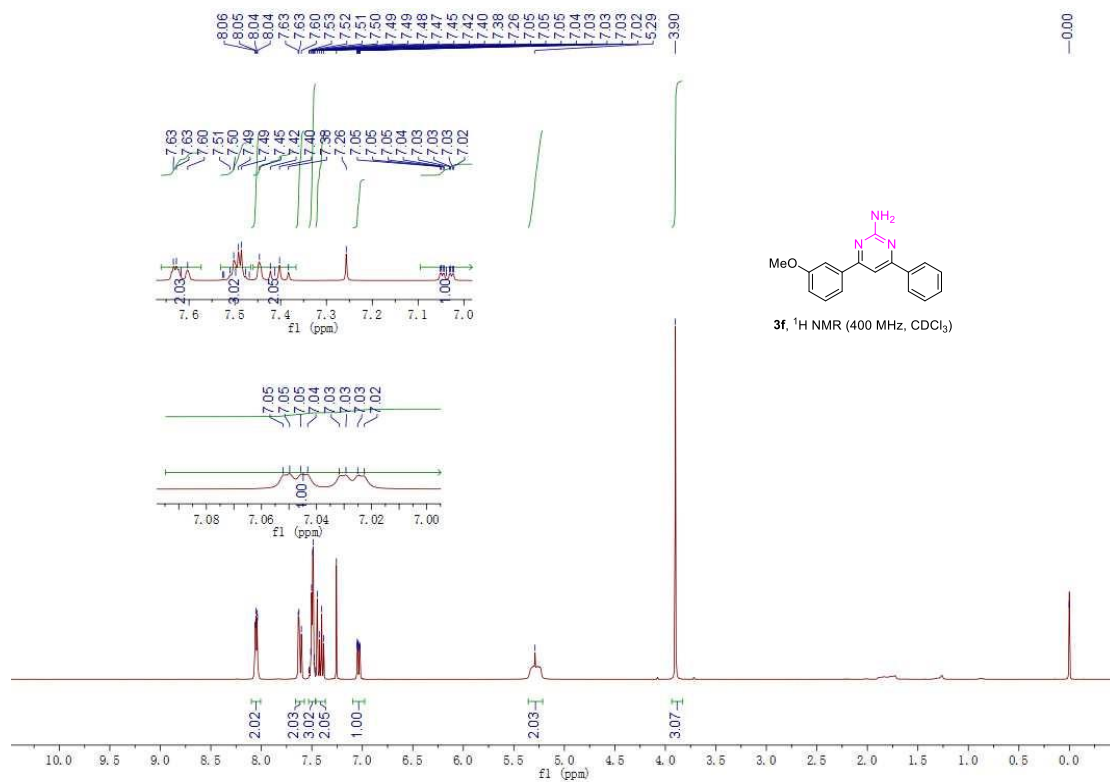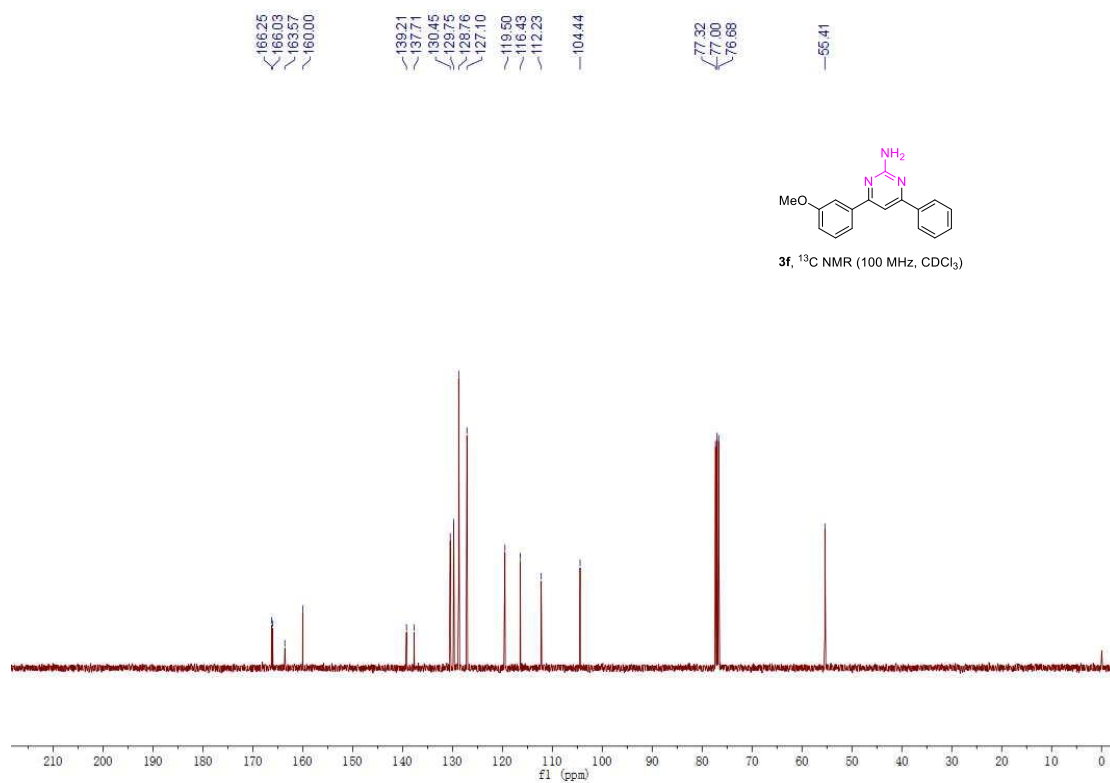



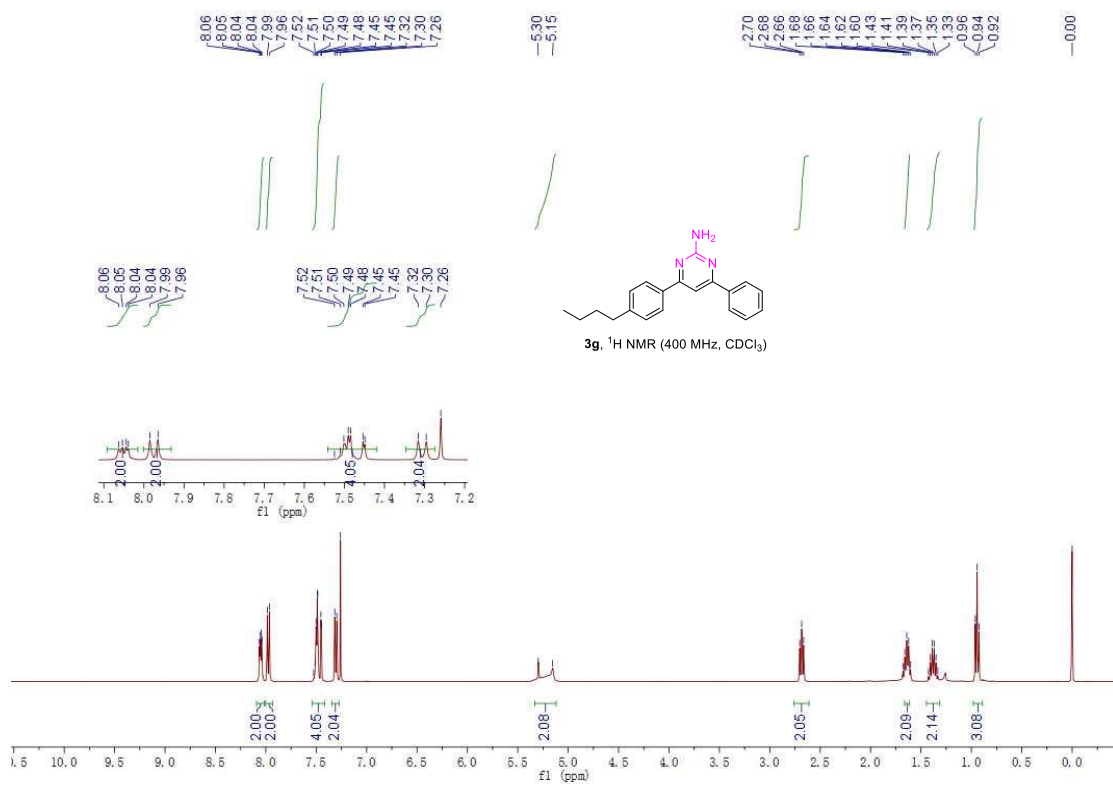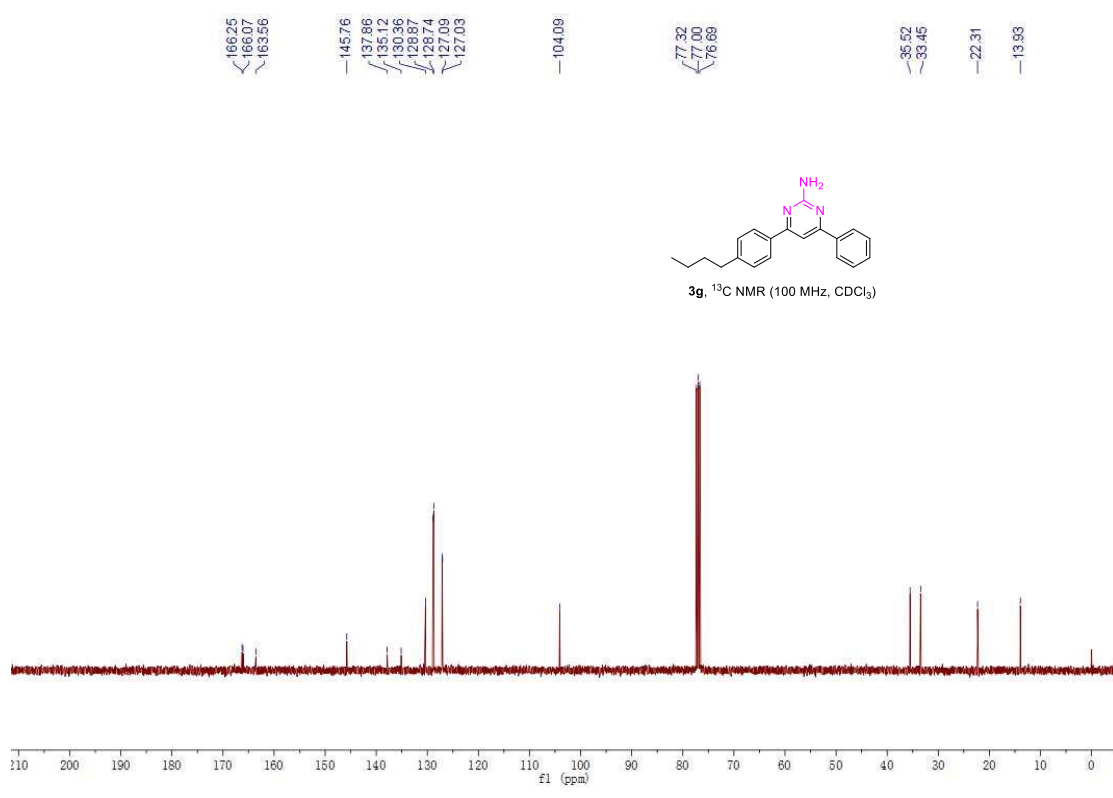

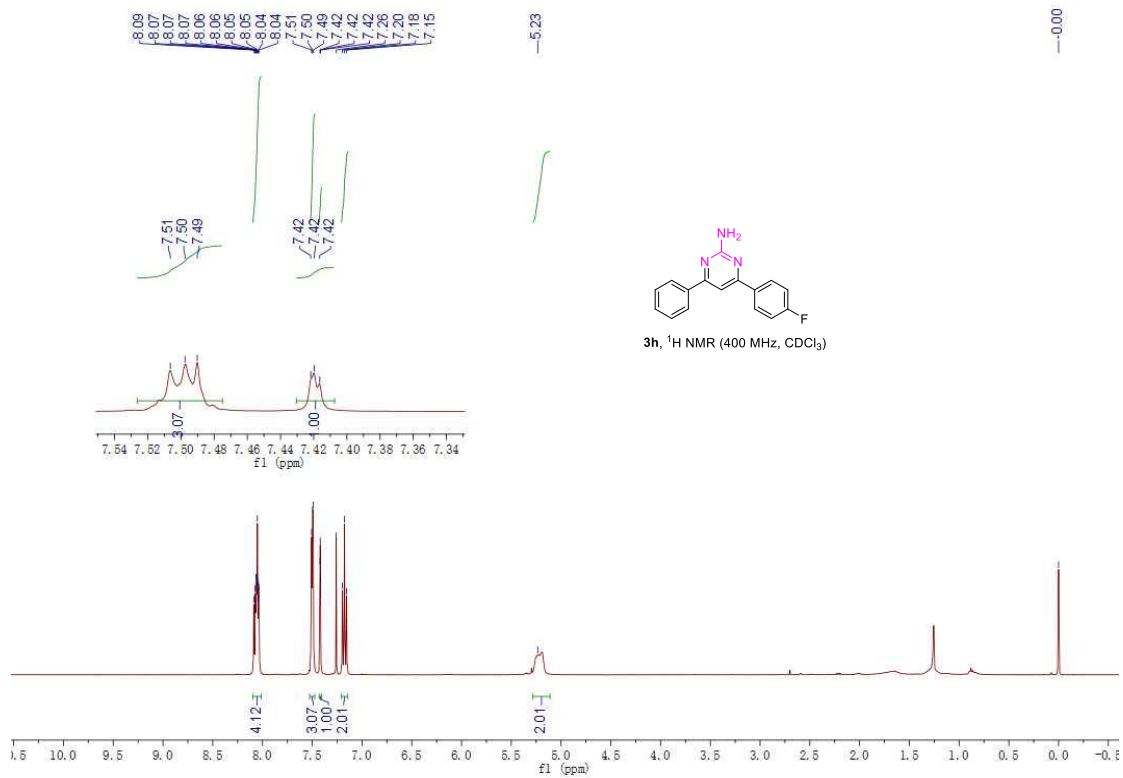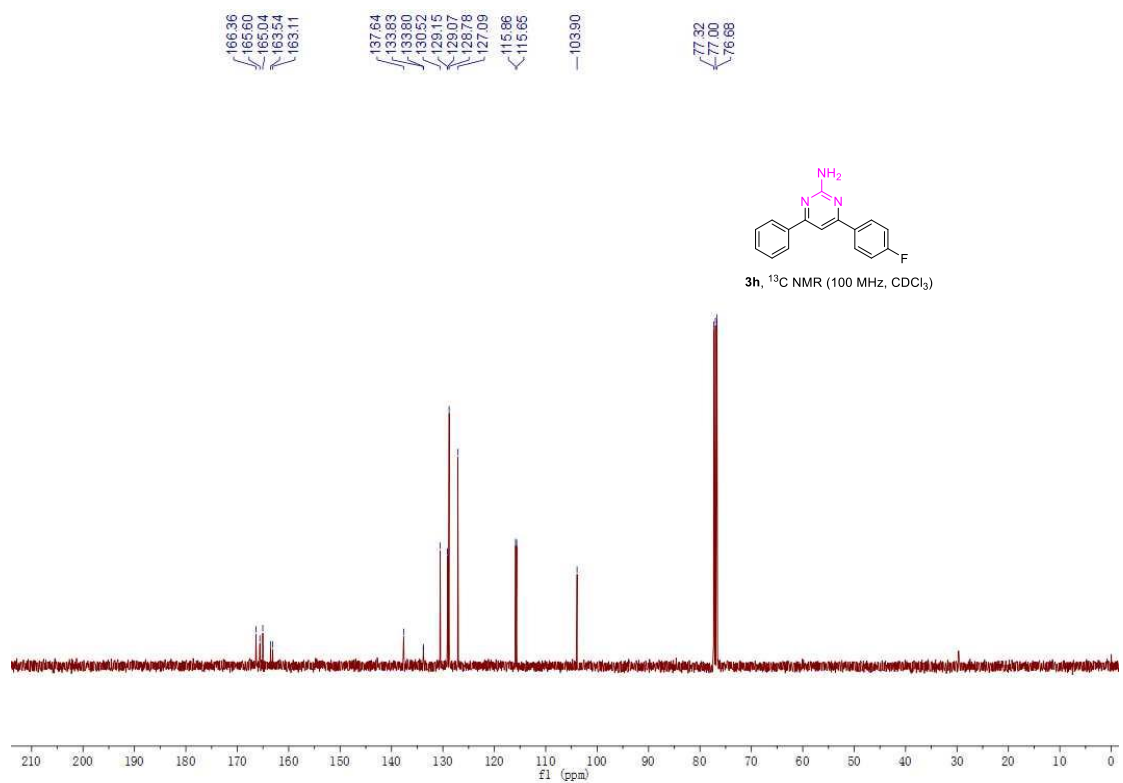

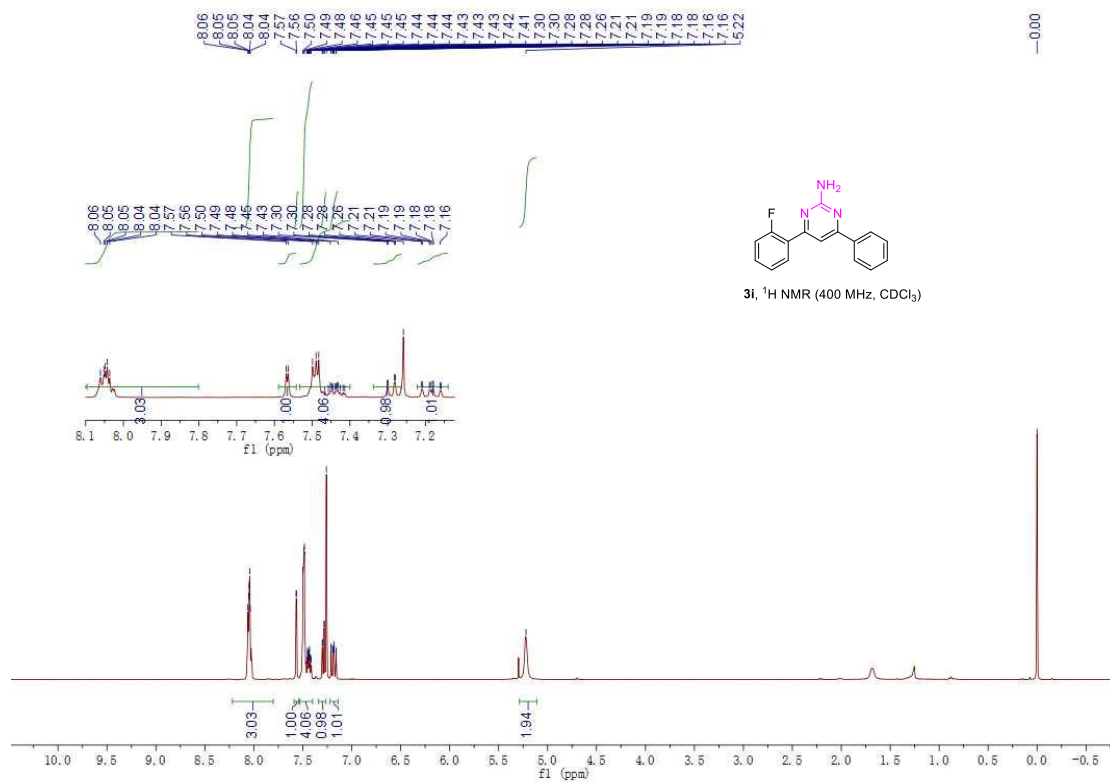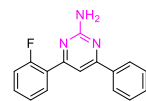

3i, <sup>1</sup>H NMR (400 MHz, CDCl<sub>3</sub>)

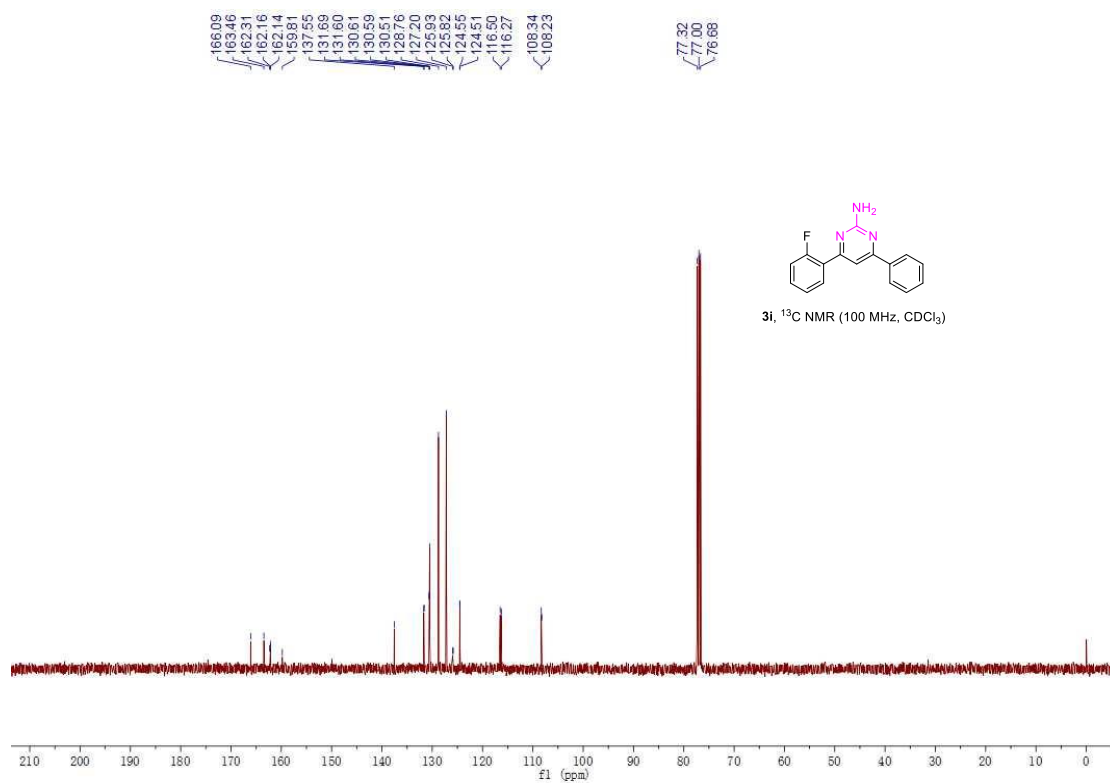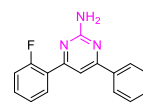

3i, <sup>13</sup>C NMR (100 MHz, CDCl<sub>3</sub>)

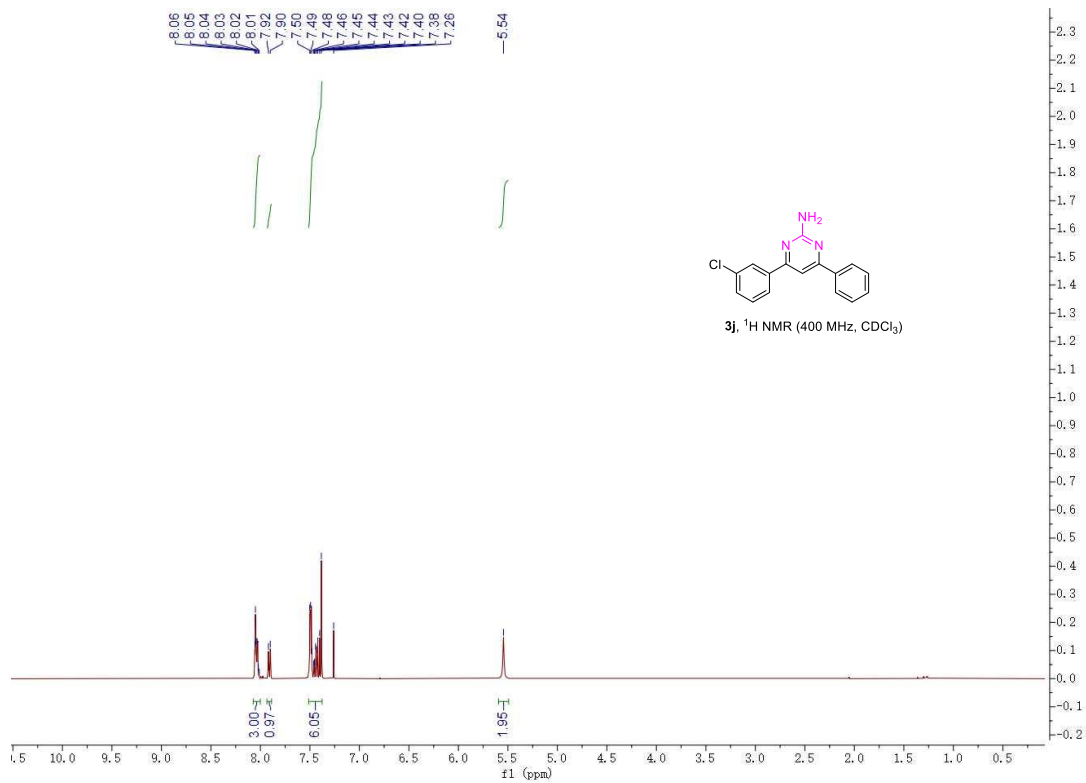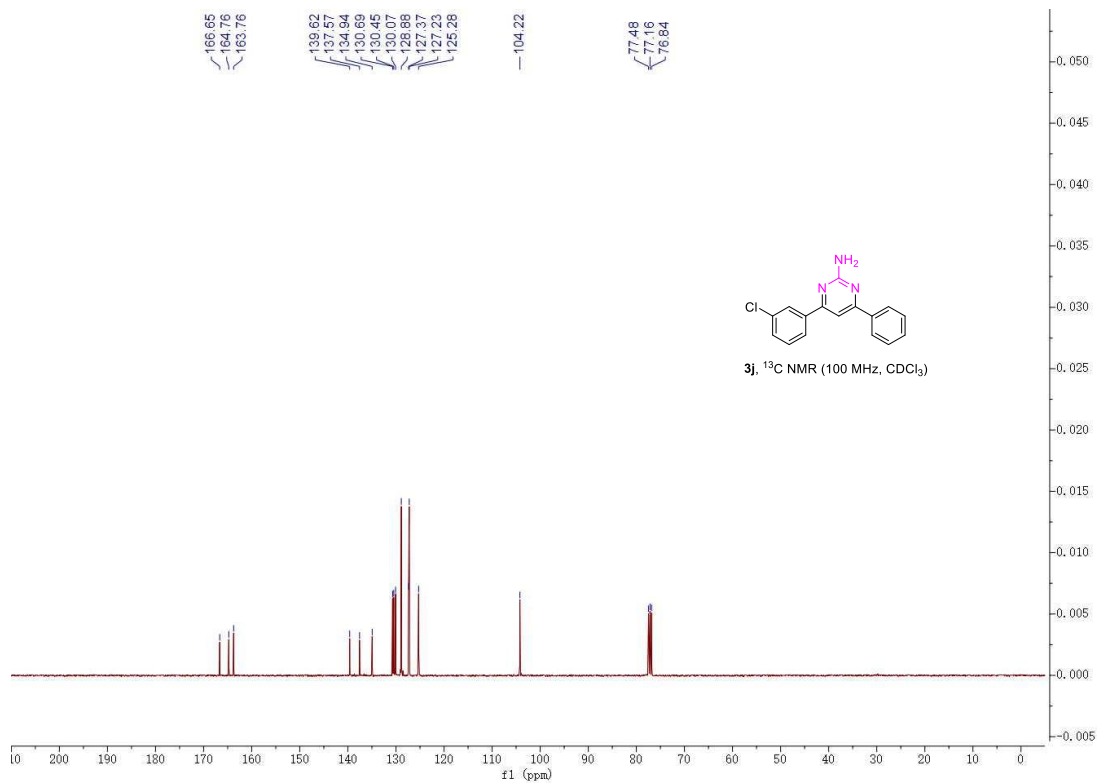

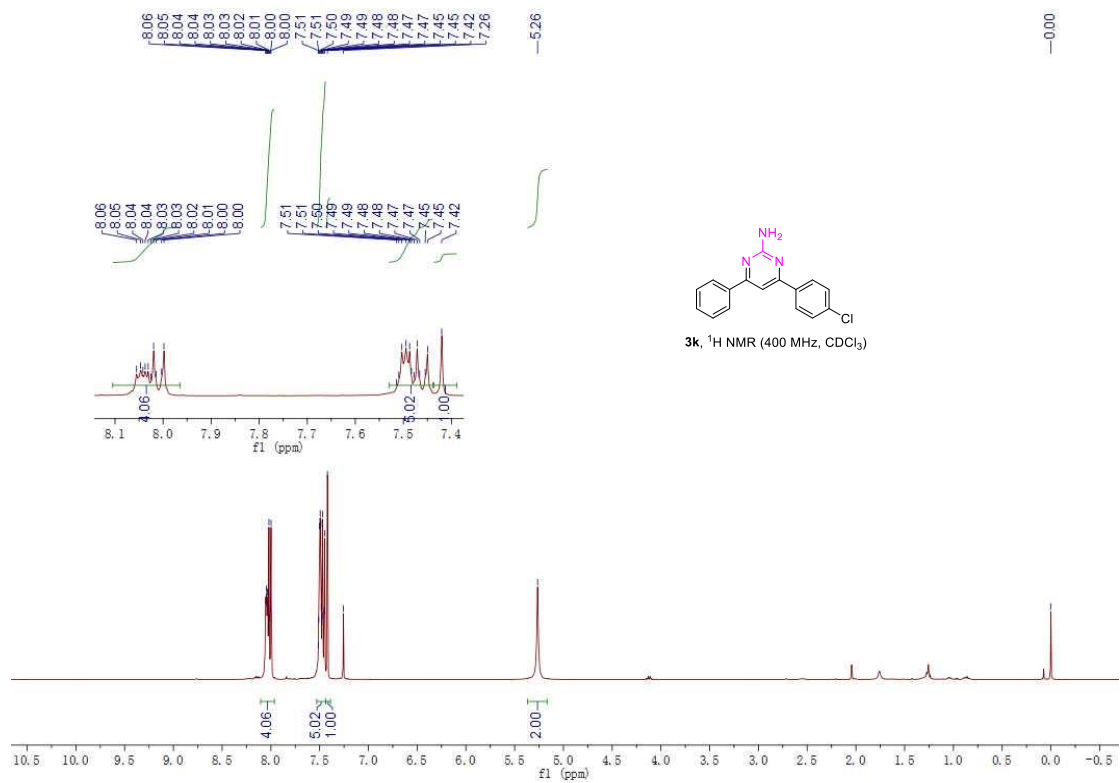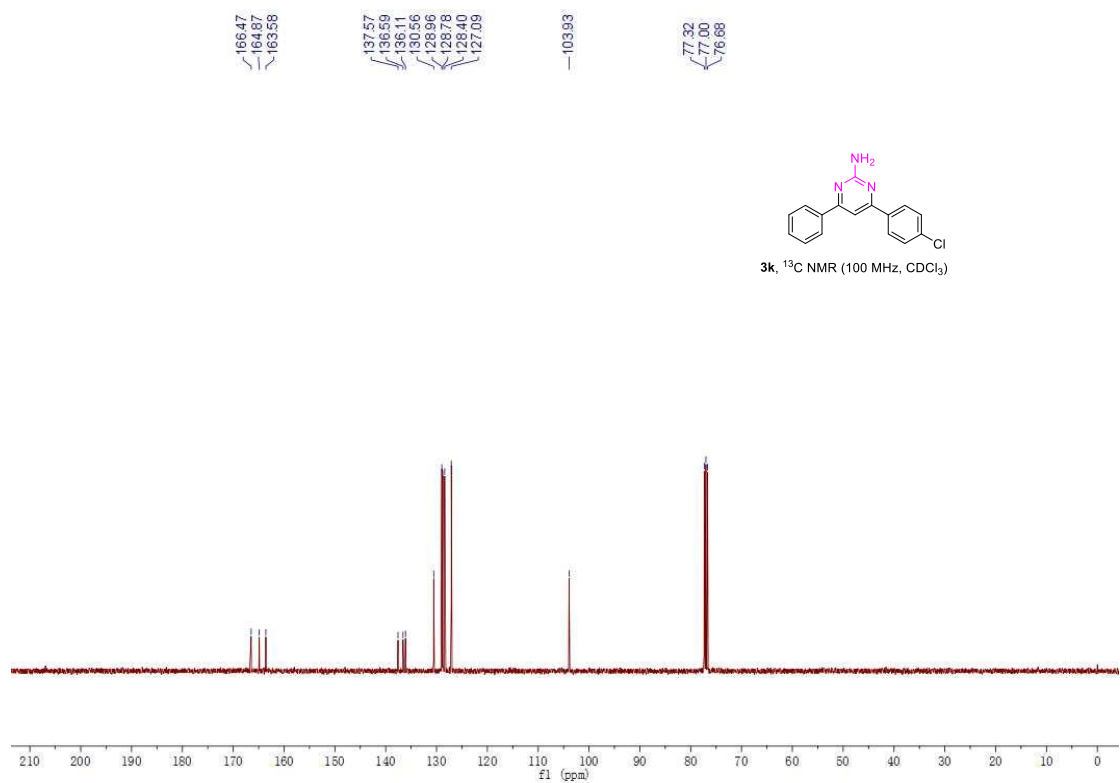

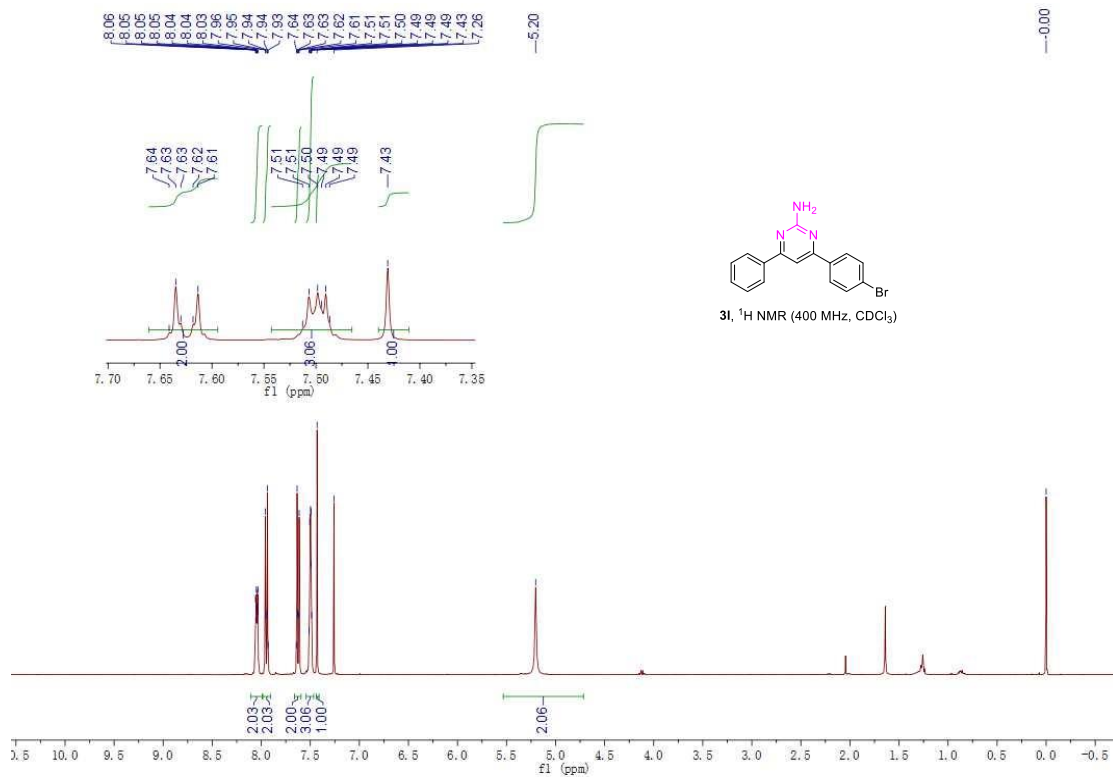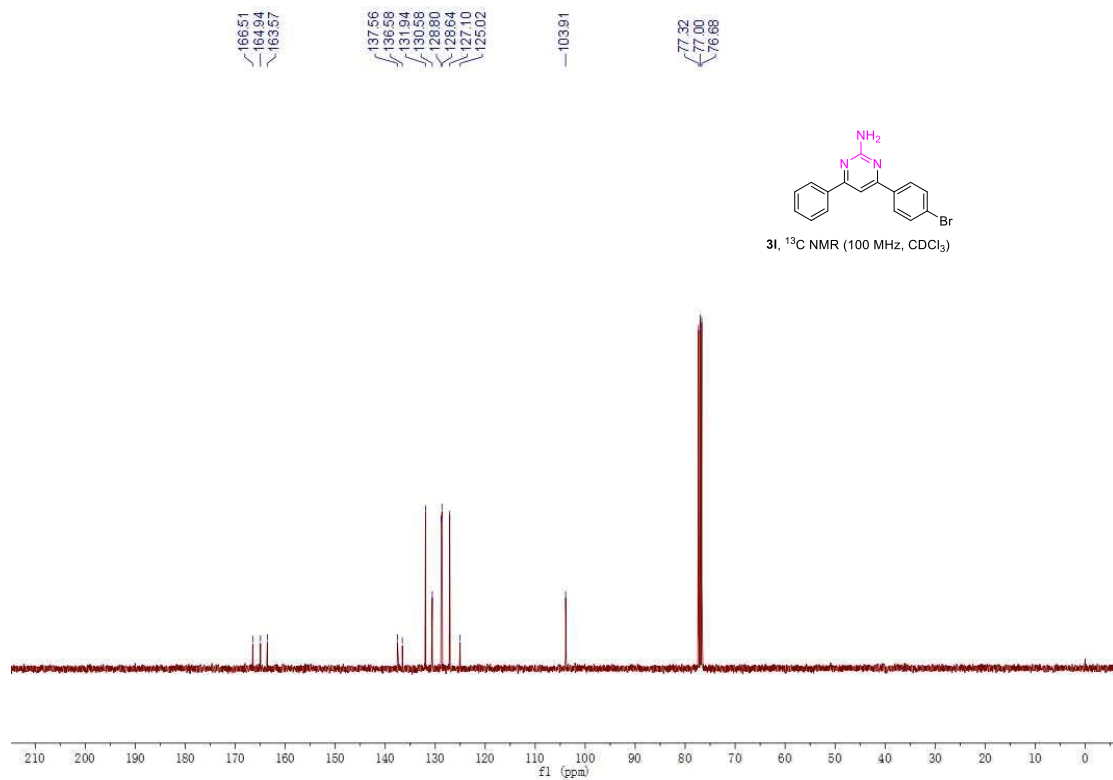

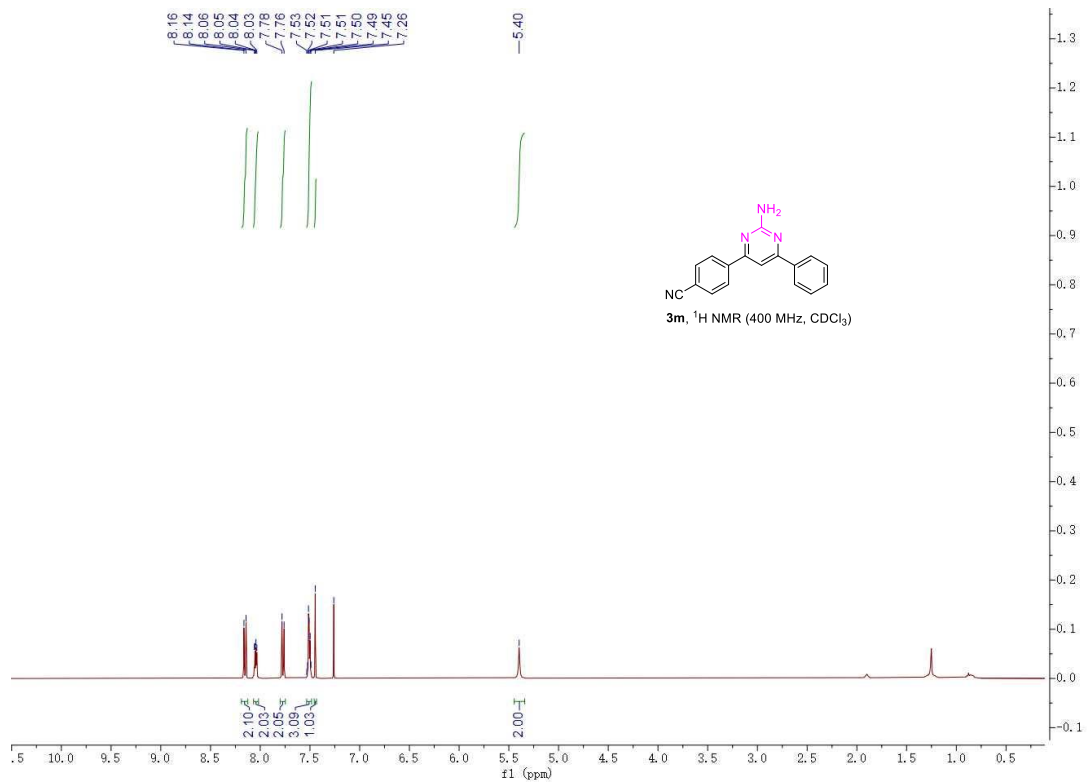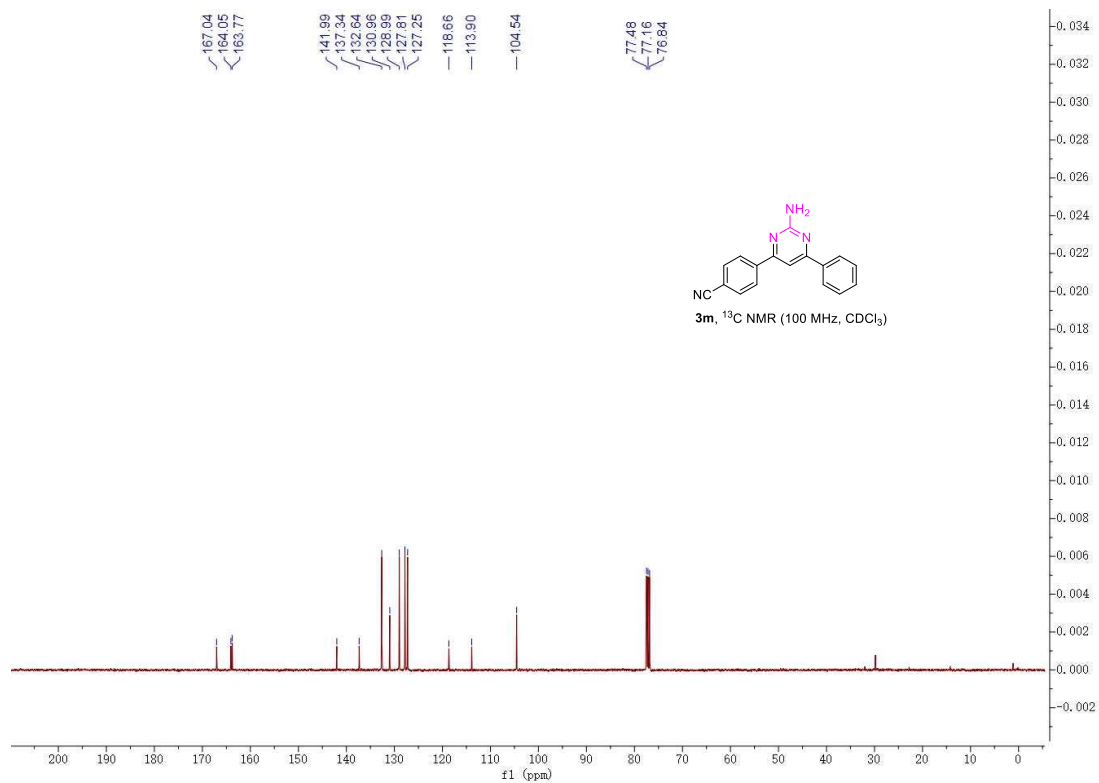

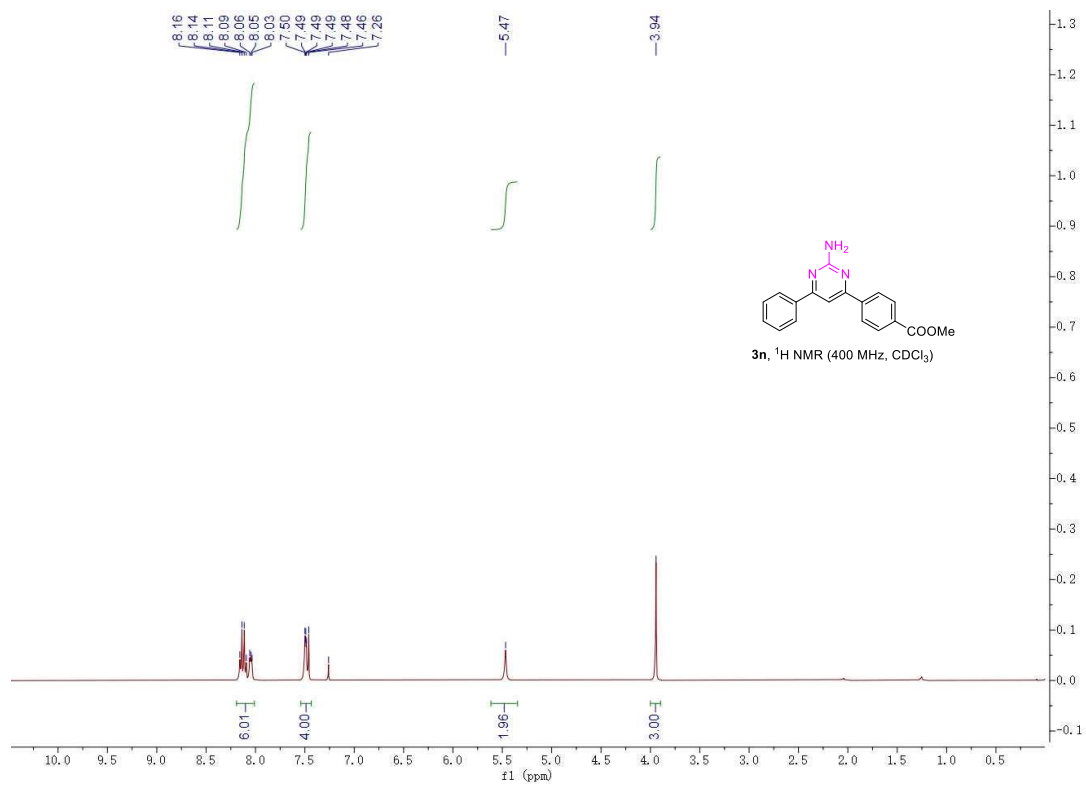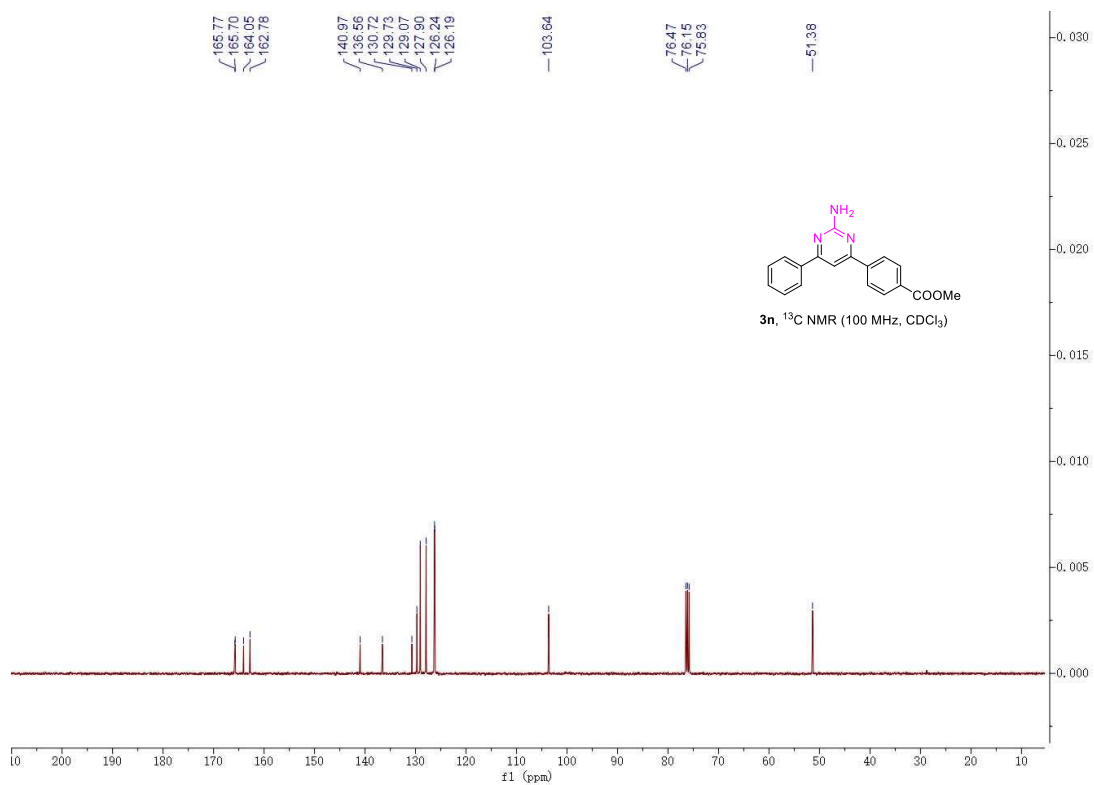



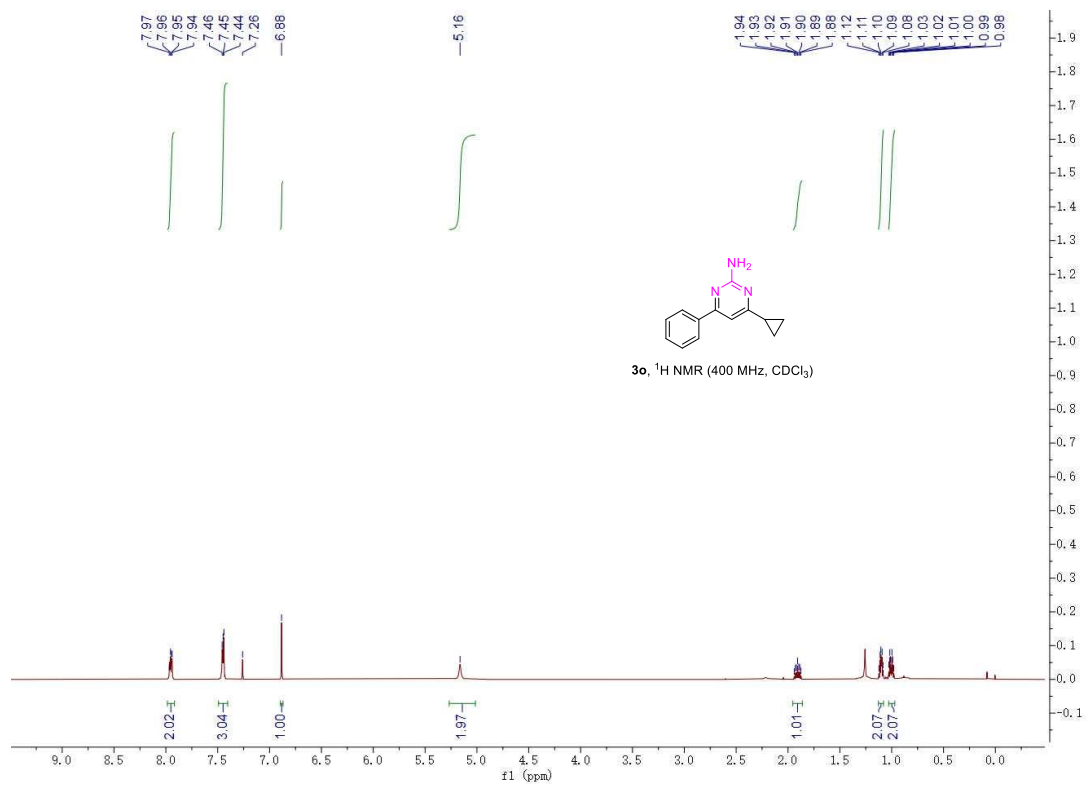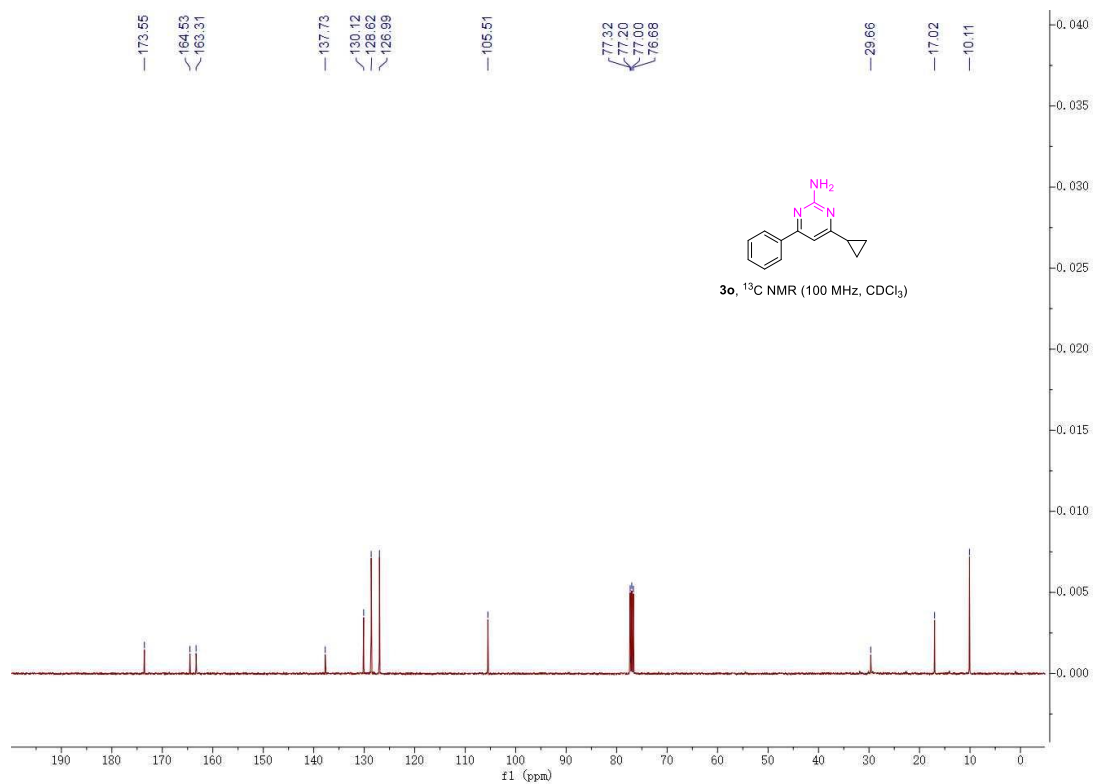

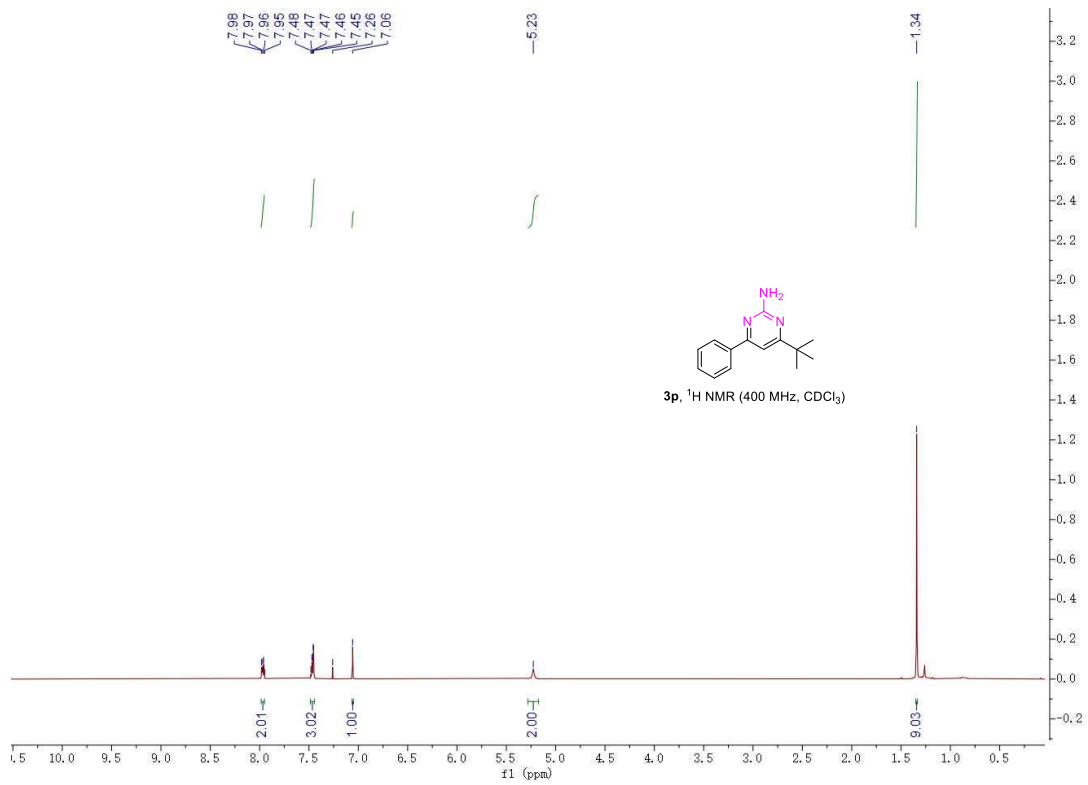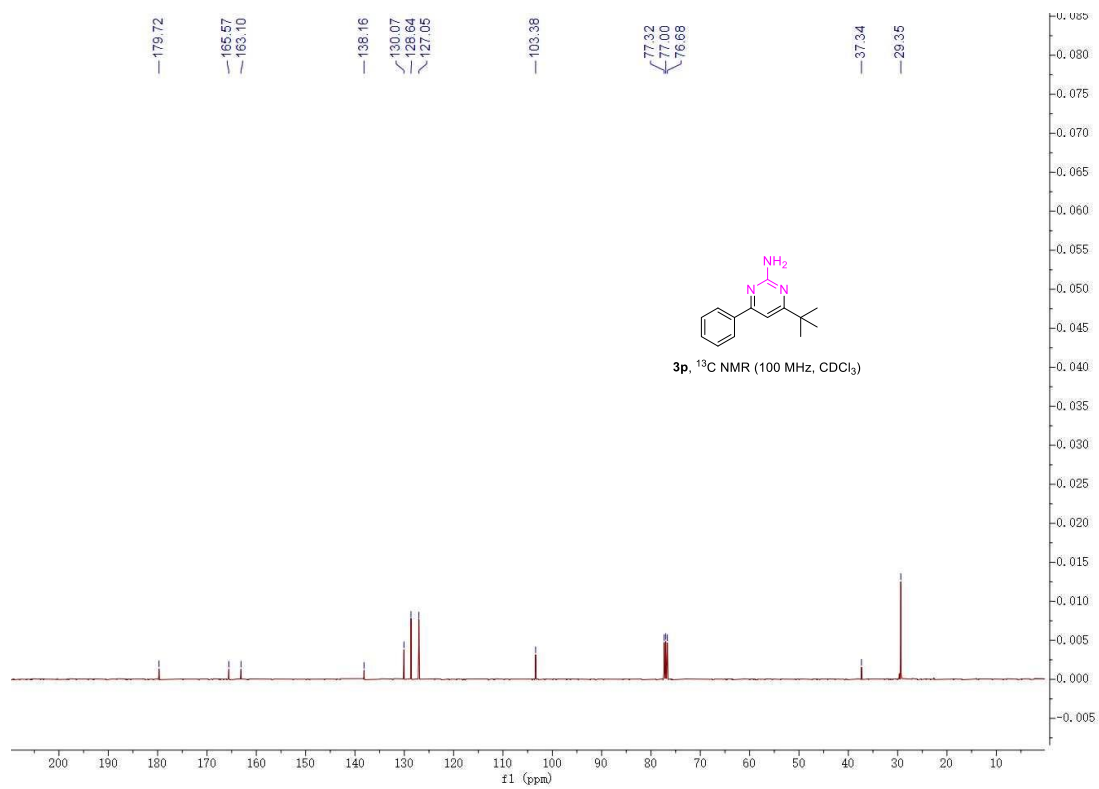

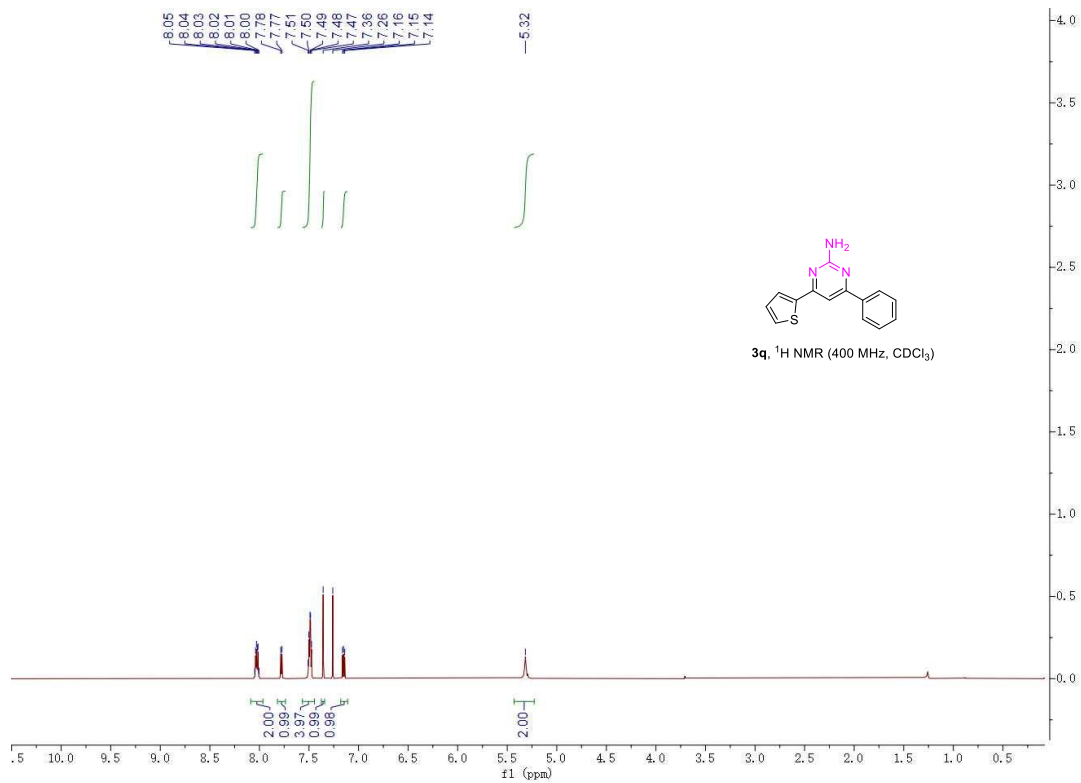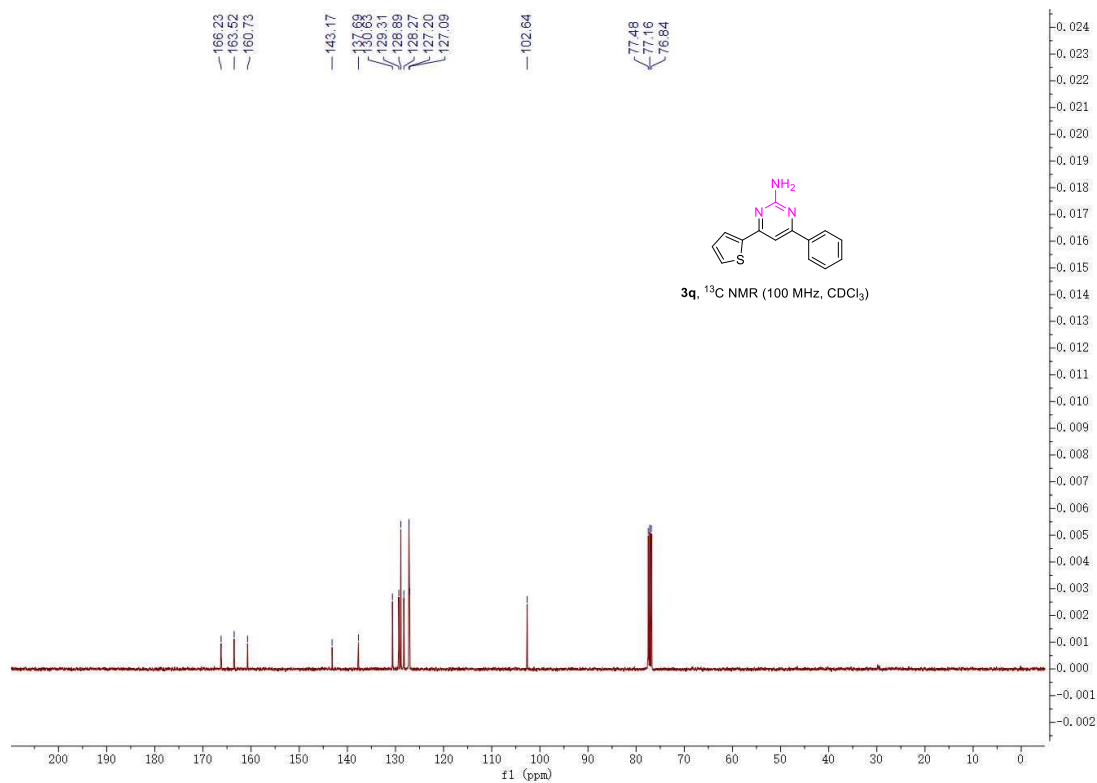

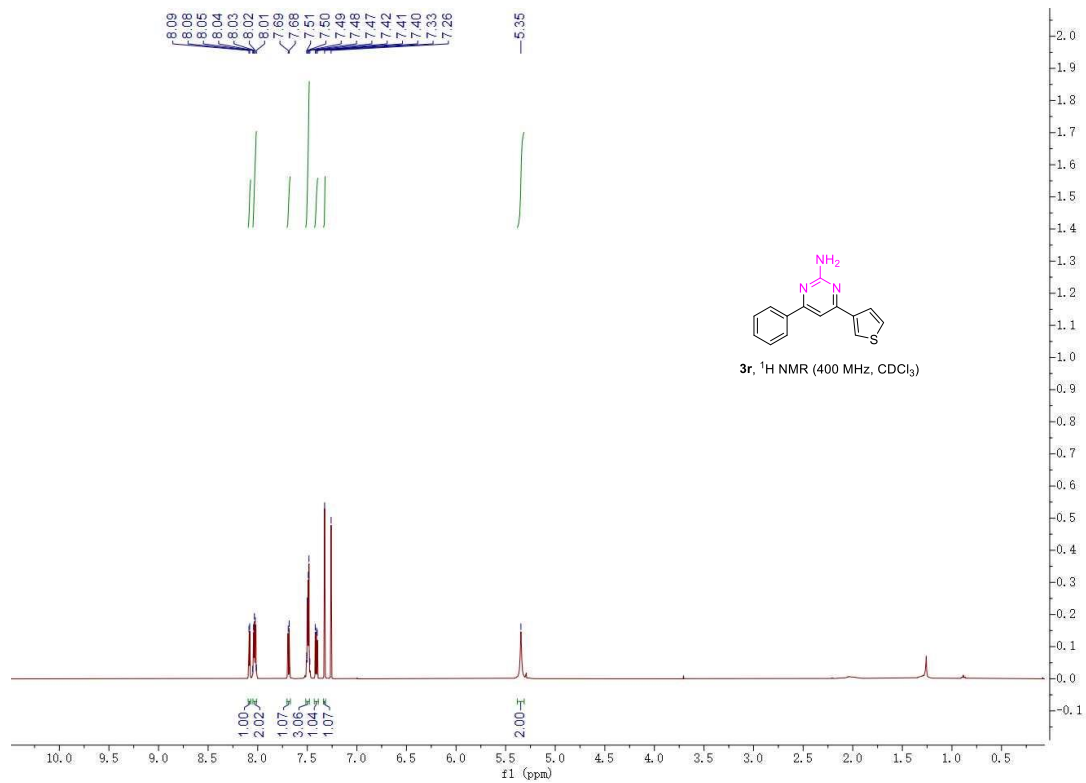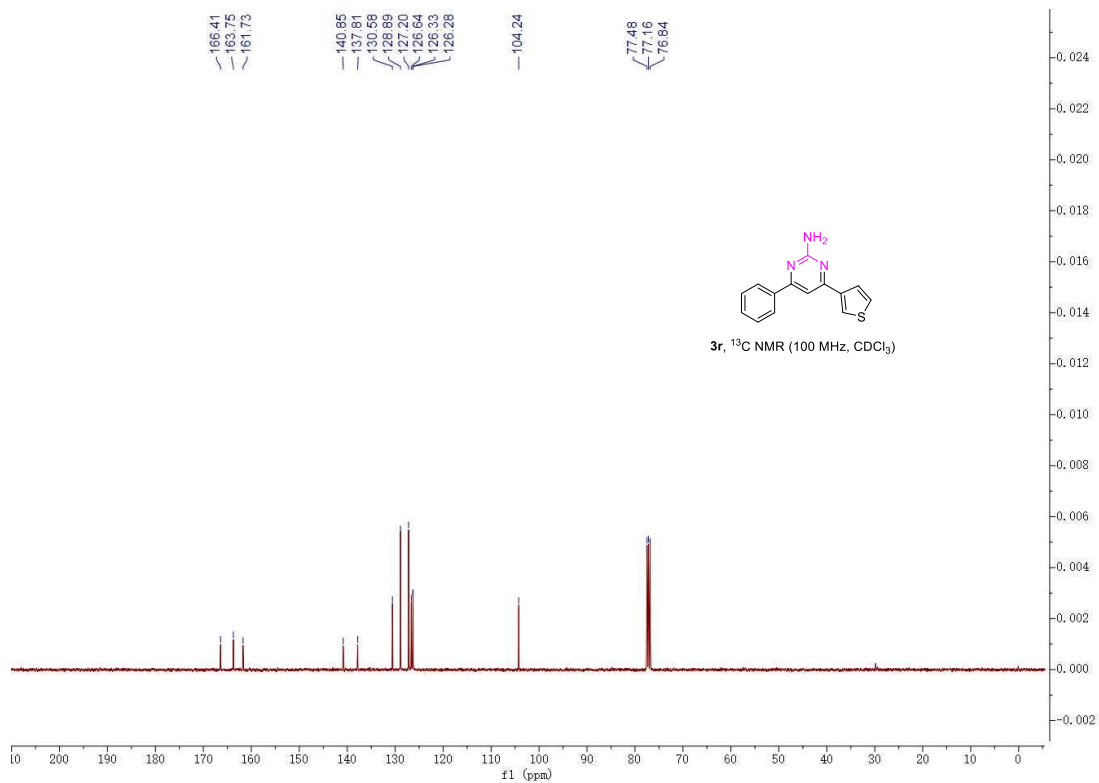

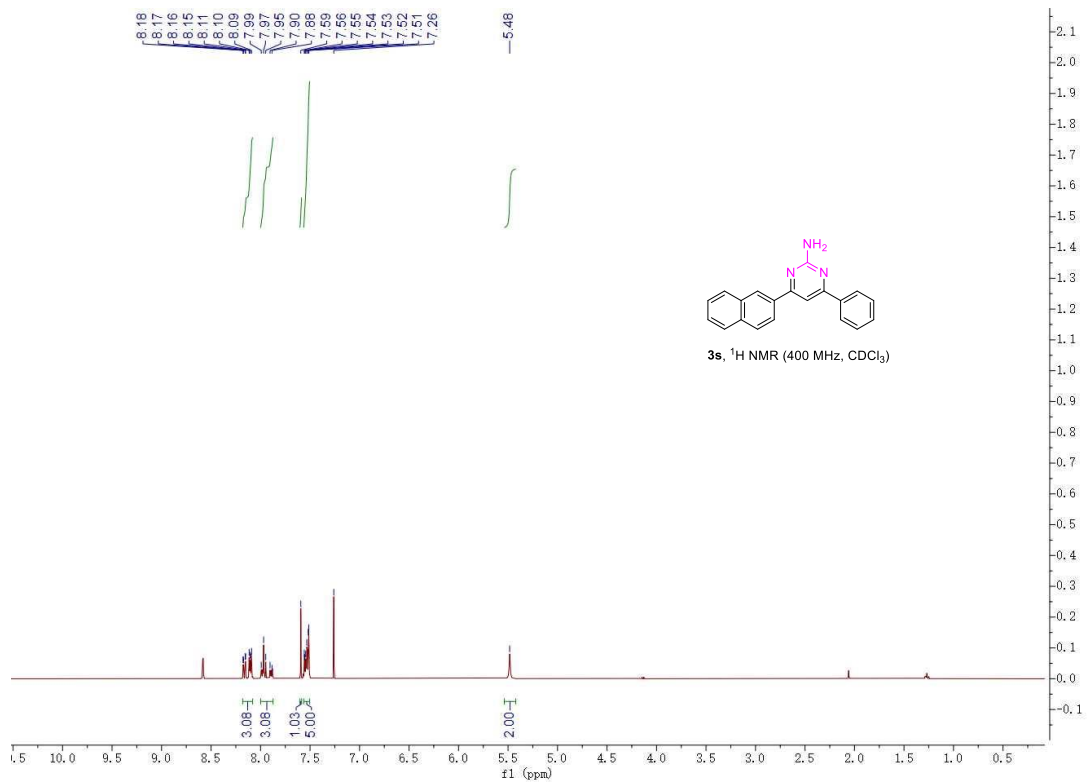

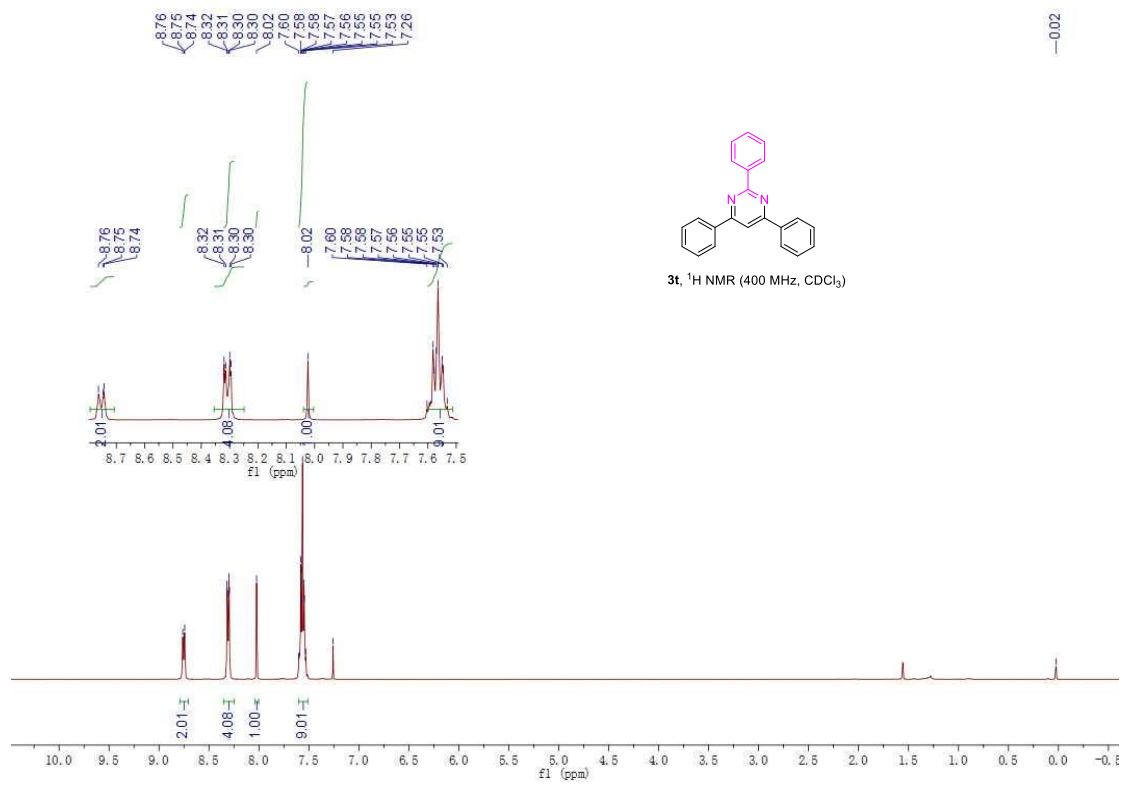

-0.02

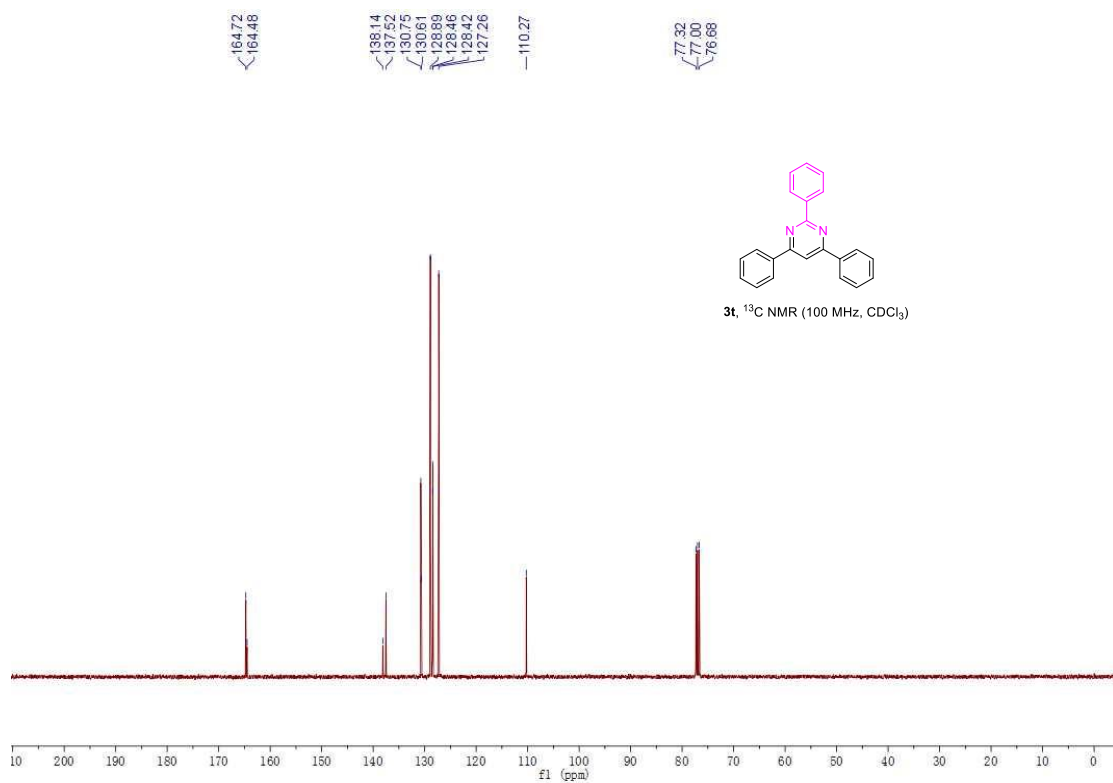

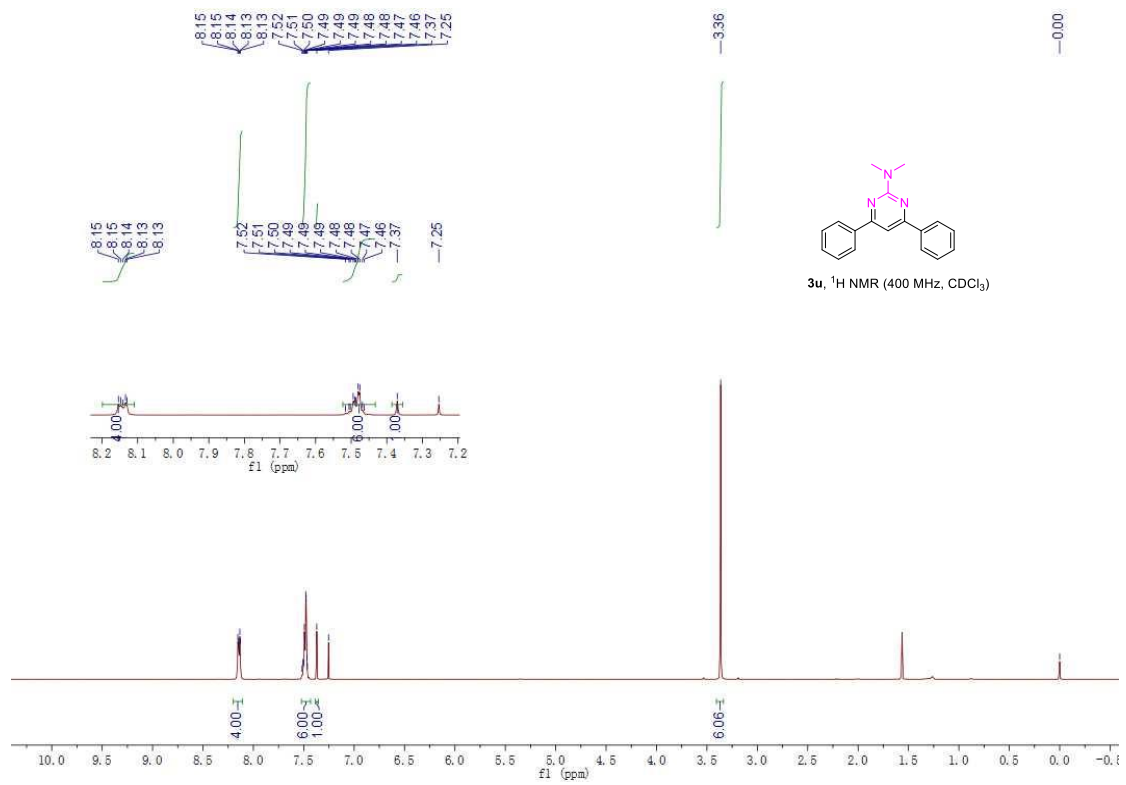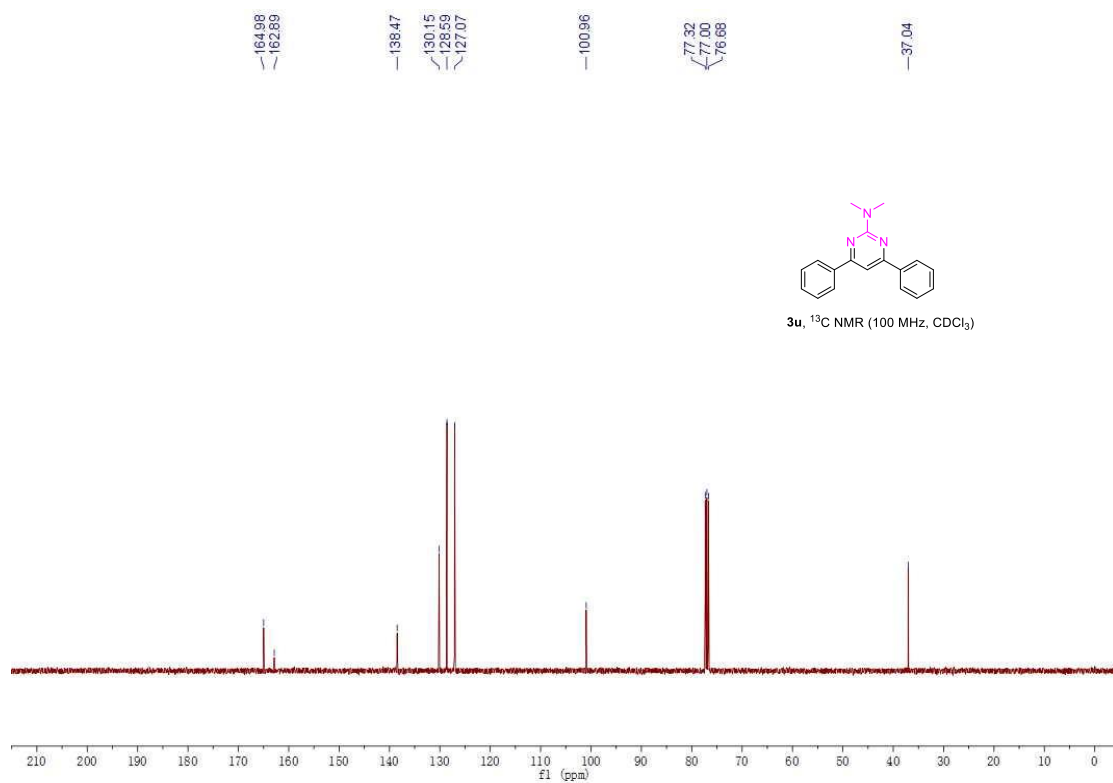

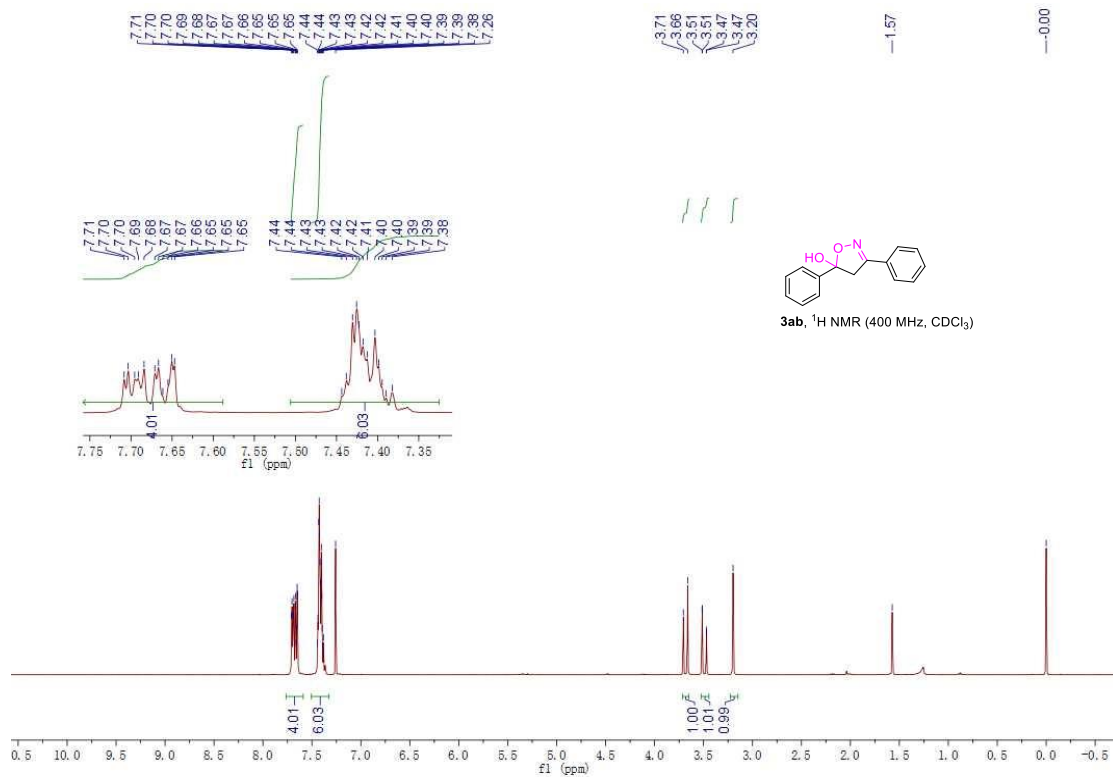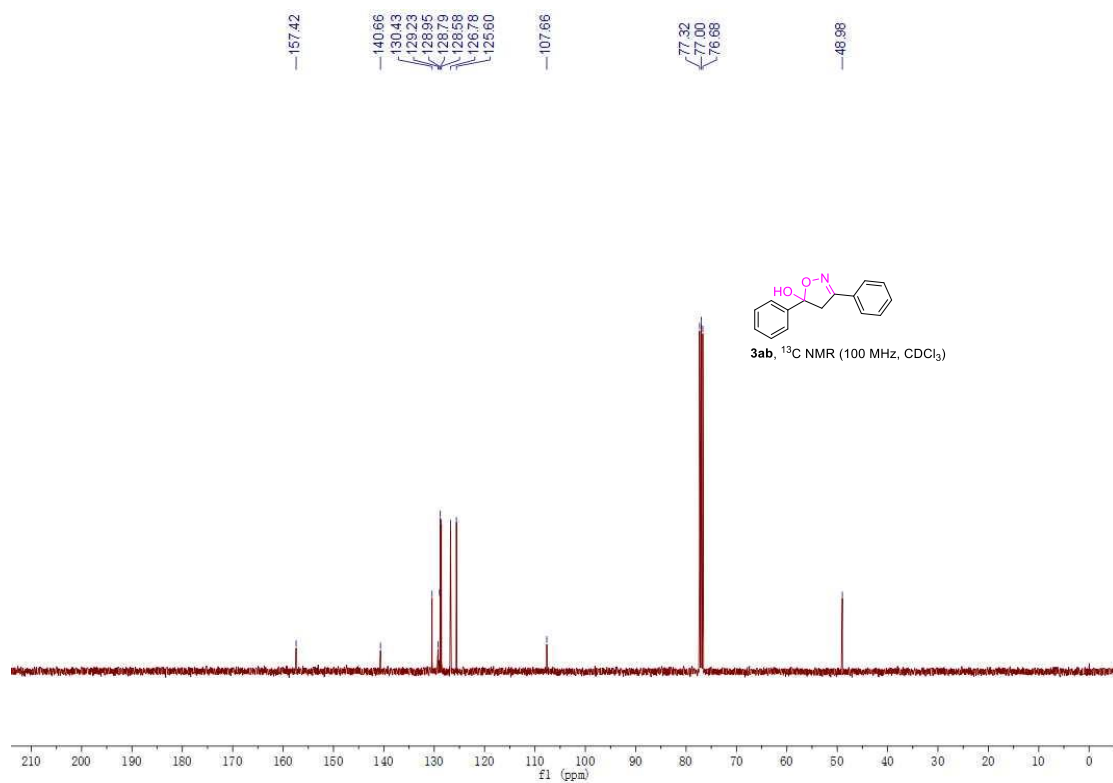



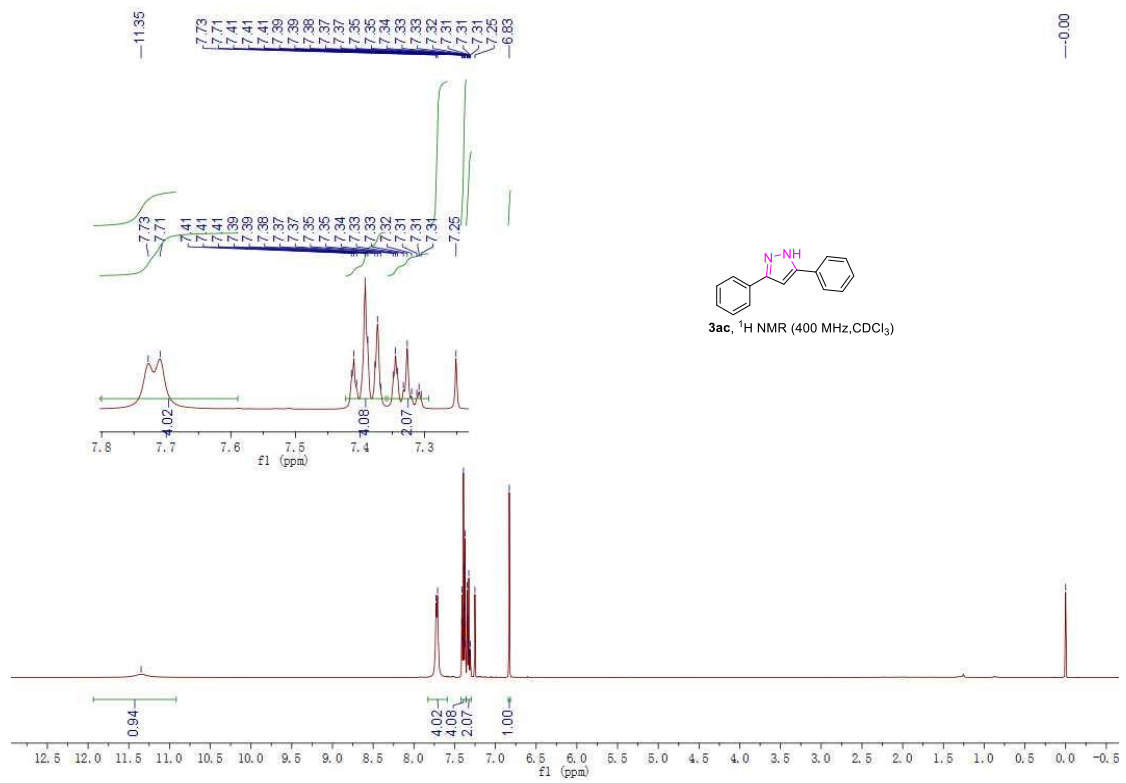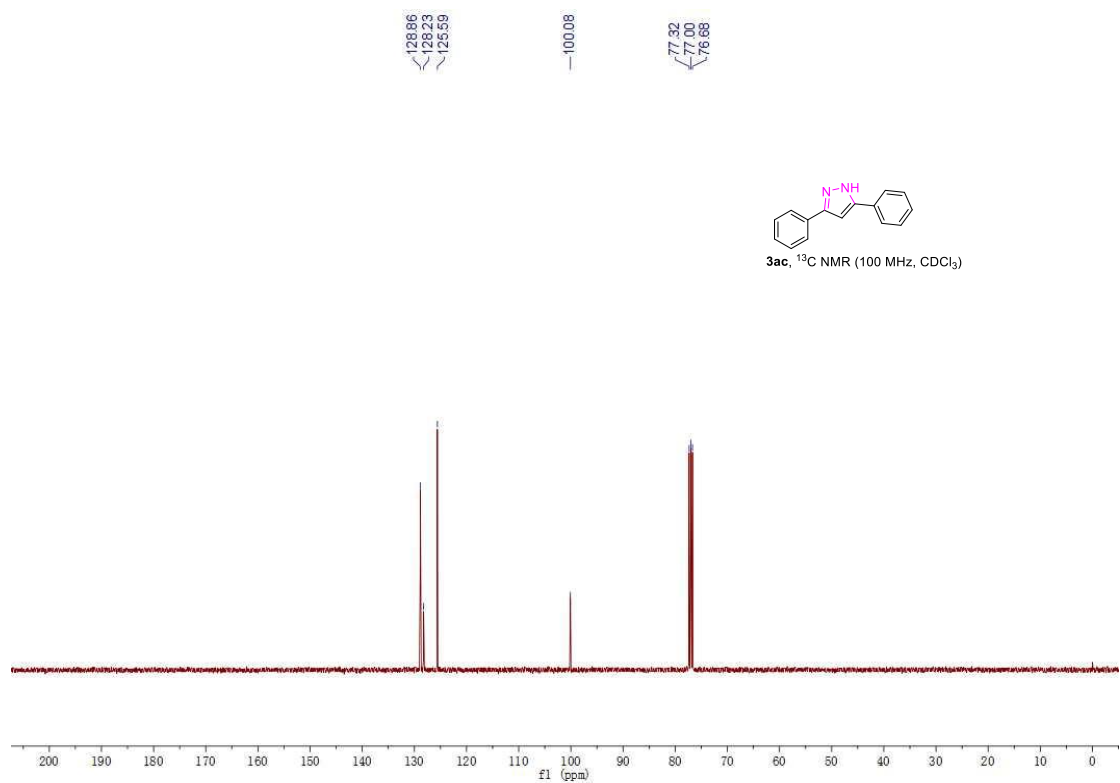

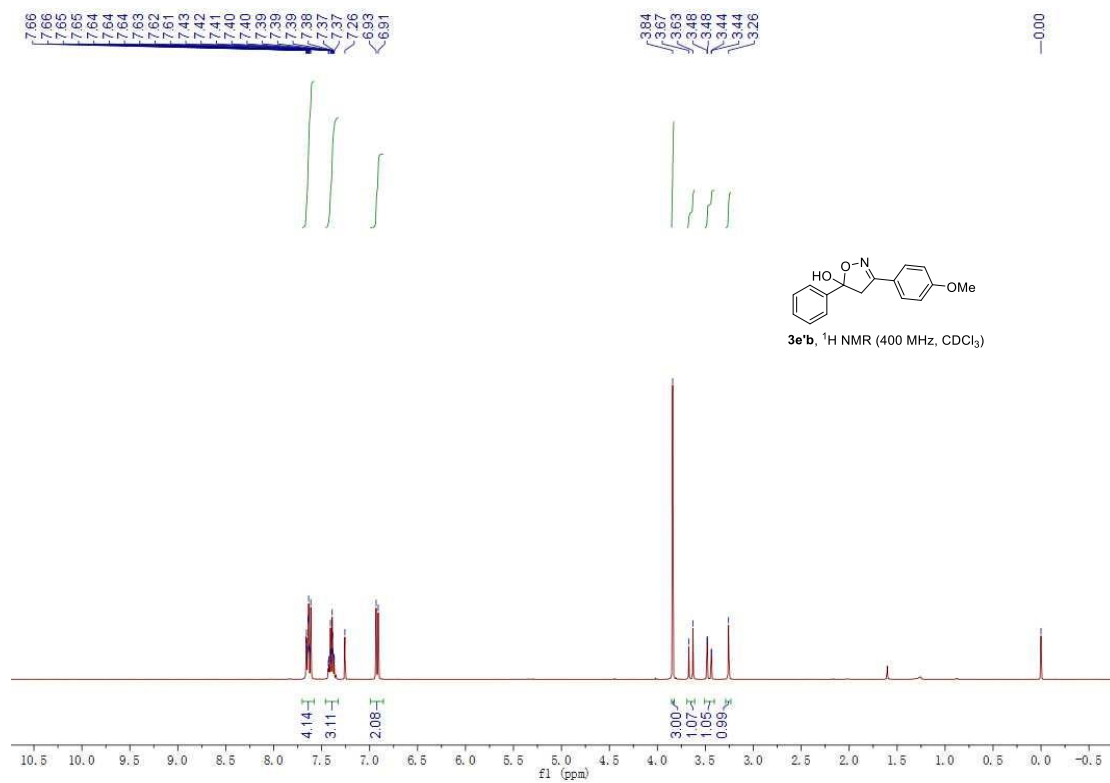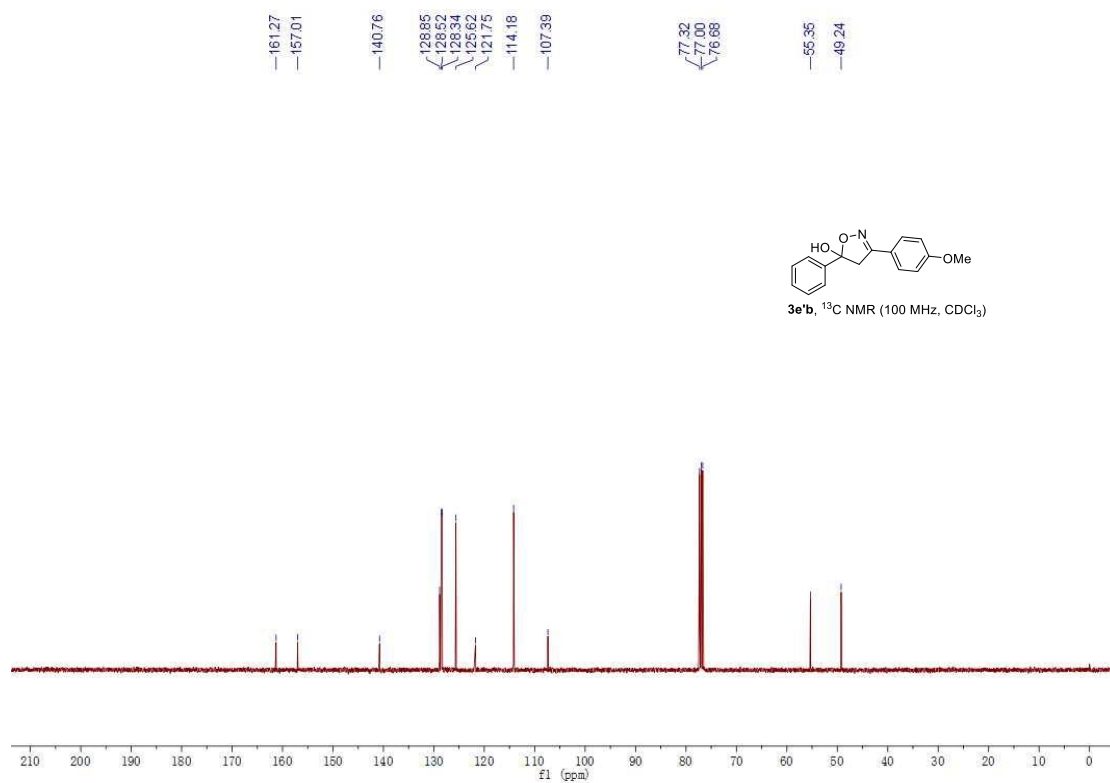

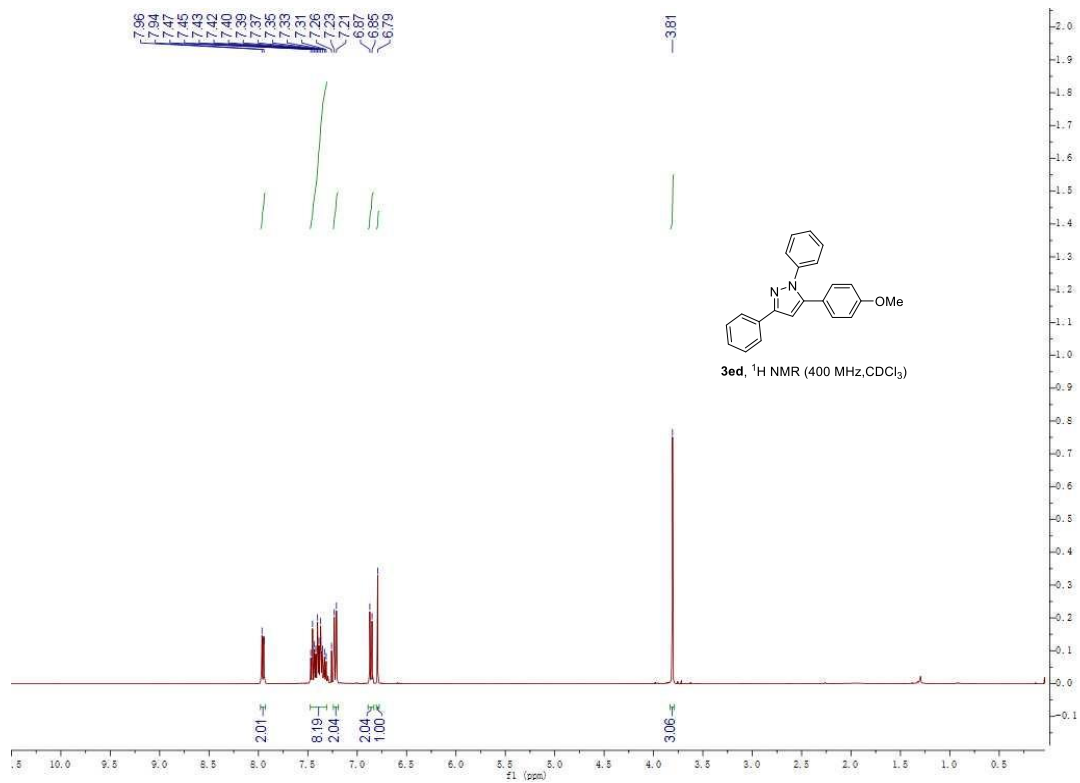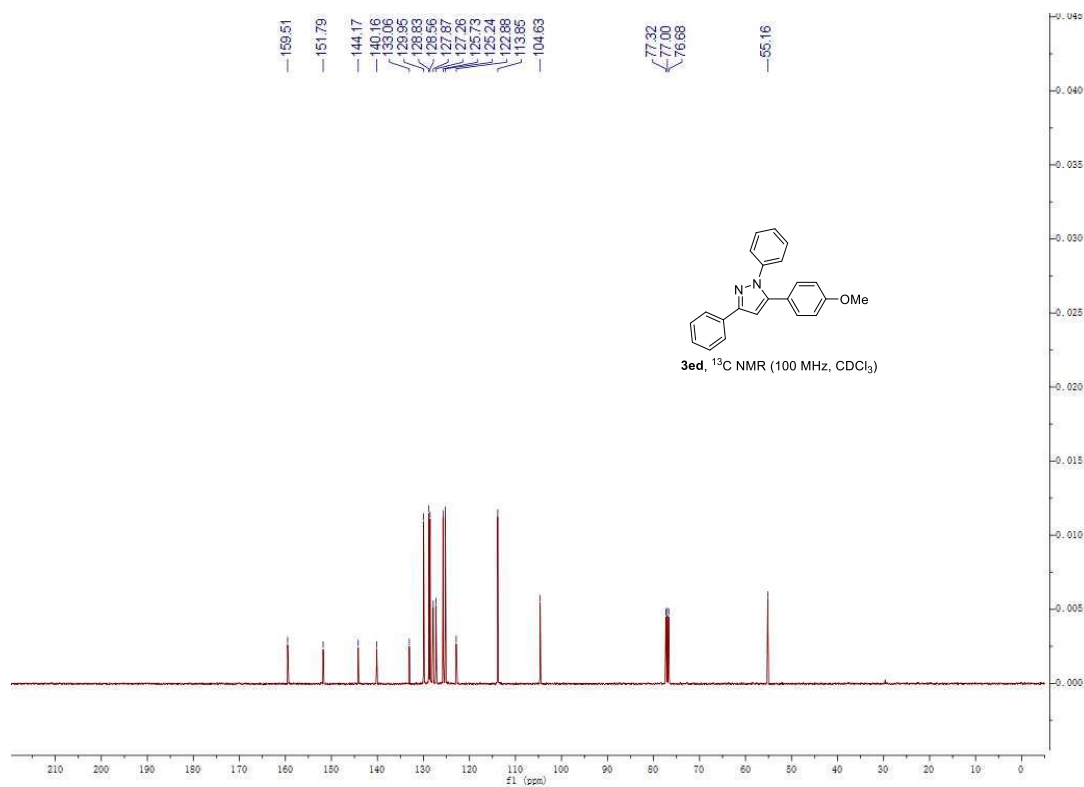

Supplement: d1ra04319f1.pdf [file d1ra04319f1.pdf]
